# Supplementary material for: Development and validation of a metastasis-related Gene Signature for predicting the Overall Survival in patients with Pancreatic Ductal Adenocarcinoma
Source: PubMed Central journal article supplement (PMC7532518; doi:10.7150/jca.47629), 2020-08-29

**Table S1. DEGs identified in PDAC**

| <b>Gene</b>     | <b>logFC</b> | <b>P Value</b> | <b>FDR</b>  | <b>regulated</b> |
|-----------------|--------------|----------------|-------------|------------------|
| <i>LAMC2</i>    | 2.650        | 1.51583E-33    | 2.28981E-29 | Up-Regulated     |
| <i>S100P</i>    | 4.297        | 3.48635E-33    | 2.63324E-29 | Up-Regulated     |
| <i>KRT19</i>    | 3.527        | 7.83878E-33    | 3.94709E-29 | Up-Regulated     |
| <i>GPRC5A</i>   | 2.936        | 2.42274E-32    | 7.59769E-29 | Up-Regulated     |
| <i>ITGA2</i>    | 2.048        | 2.51479E-32    | 7.59769E-29 | Up-Regulated     |
| <i>SLPI</i>     | 2.634        | 1.12073E-31    | 2.82161E-28 | Up-Regulated     |
| <i>ANXA2</i>    | 1.298        | 2.99506E-31    | 6.46334E-28 | Up-Regulated     |
| <i>INHBA</i>    | 3.142        | 2.69629E-30    | 5.09126E-27 | Up-Regulated     |
| <i>GJB2</i>     | 3.389        | 3.20932E-30    | 5.38667E-27 | Up-Regulated     |
| <i>FN1</i>      | 2.787        | 1.02154E-29    | 1.54314E-26 | Up-Regulated     |
| <i>SLC6A14</i>  | 3.817        | 1.86355E-29    | 2.55916E-26 | Up-Regulated     |
| <i>KRT7</i>     | 2.681        | 2.05178E-29    | 2.58285E-26 | Up-Regulated     |
| <i>SULF1</i>    | 3.126        | 3.60334E-29    | 4.18708E-26 | Up-Regulated     |
| <i>SFN</i>      | 2.944        | 6.54358E-29    | 7.06052E-26 | Up-Regulated     |
| <i>AHNAK2</i>   | 2.281        | 8.47941E-29    | 8.53934E-26 | Up-Regulated     |
| <i>TNFRSF21</i> | 1.607        | 2.14461E-28    | 2.02478E-25 | Up-Regulated     |
| <i>COL10A1</i>  | 3.480        | 2.76465E-28    | 2.45664E-25 | Up-Regulated     |
| <i>LAMB3</i>    | 2.223        | 3.55549E-28    | 2.98384E-25 | Up-Regulated     |
| <i>NQO1</i>     | 2.573        | 6.26771E-28    | 4.98316E-25 | Up-Regulated     |
| <i>ANO1</i>     | 1.826        | 6.90453E-28    | 5.21499E-25 | Up-Regulated     |
| <i>SERPINB5</i> | 2.598        | 1.64594E-27    | 1.18398E-24 | Up-Regulated     |
| <i>S100A11</i>  | 1.839        | 1.89543E-27    | 1.30147E-24 | Up-Regulated     |
| <i>IGFBP3</i>   | 2.459        | 2.09147E-27    | 1.37364E-24 | Up-Regulated     |
| <i>S100A10</i>  | 1.439        | 3.54929E-27    | 2.23398E-24 | Up-Regulated     |
| <i>COL11A1</i>  | 3.605        | 4.55117E-27    | 2.75E-24    | Up-Regulated     |
| <i>SDR16C5</i>  | 3.022        | 5.35834E-27    | 3.11319E-24 | Up-Regulated     |
| <i>MBOAT2</i>   | 1.350        | 5.73091E-27    | 3.20634E-24 | Up-Regulated     |
| <i>TMPRSS4</i>  | 2.301        | 7.61661E-27    | 4.10916E-24 | Up-Regulated     |
| <i>S100A16</i>  | 1.380        | 1.03867E-26    | 5.41041E-24 | Up-Regulated     |
| <i>DCBLD1</i>   | 1.237        | 1.46446E-26    | 7.37403E-24 | Up-Regulated     |
| <i>ITGB1BP1</i> | 1.161        | 1.60406E-26    | 7.81644E-24 | Up-Regulated     |
| <i>NHS</i>      | 1.493        | 2.08194E-26    | 9.53022E-24 | Up-Regulated     |
| <i>BIK</i>      | 1.840        | 3.08514E-26    | 1.37071E-23 | Up-Regulated     |
| <i>CTHRC1</i>   | 3.221        | 3.35714E-26    | 1.44894E-23 | Up-Regulated     |
| <i>S100A6</i>   | 2.392        | 3.48733E-26    | 1.46332E-23 | Up-Regulated     |
| <i>CAPG</i>     | 1.813        | 7.40686E-26    | 3.024E-23   | Up-Regulated     |
| <i>GJB3</i>     | 1.206        | 7.8409E-26     | 3.11696E-23 | Up-Regulated     |
| <i>SDC1</i>     | 1.422        | 8.08522E-26    | 3.13167E-23 | Up-Regulated     |
| <i>KDM5B</i>    | 1.053        | 8.31294E-26    | 3.13938E-23 | Up-Regulated     |
| <i>COL1A2</i>   | 3.012        | 9.47339E-26    | 3.49037E-23 | Up-Regulated     |
| <i>NOX4</i>     | 1.997        | 1.15155E-25    | 4.14173E-23 | Up-Regulated     |
| <i>HOXB7</i>    | 1.497        | 2.20995E-25    | 7.76362E-23 | Up-Regulated     |
| <i>TPBG</i>     | 1.330        | 2.32188E-25    | 7.97144E-23 | Up-Regulated     |
| <i>C15orf48</i> | 2.588        | 2.60955E-25    | 8.75998E-23 | Up-Regulated     |
| <i>FHL2</i>     | 1.802        | 3.28089E-25    | 1.07741E-22 | Up-Regulated     |
| <i>ARNTL2</i>   | 1.571        | 5.15371E-25    | 1.65642E-22 | Up-Regulated     |
| <i>MXRA5</i>    | 1.976        | 5.44454E-25    | 1.71344E-22 | Up-Regulated     |
| <i>HOXB3</i>    | 1.354        | 6.25057E-25    | 1.92696E-22 | Up-Regulated     |
| <i>TSPAN1</i>   | 2.076        | 7.43038E-25    | 2.24487E-22 | Up-Regulated     |
| <i>COL5A2</i>   | 2.580        | 8.67099E-25    | 2.54123E-22 | Up-Regulated     |

|          |       |             |             |              |
|----------|-------|-------------|-------------|--------------|
| MYOF     | 1.737 | 8.74778E-25 | 2.54123E-22 | Up-Regulated |
| CTSE     | 3.136 | 1.22047E-24 | 3.47858E-22 | Up-Regulated |
| ADAMTS12 | 1.508 | 1.38002E-24 | 3.86047E-22 | Up-Regulated |
| SHISA2   | 2.153 | 1.94594E-24 | 5.34461E-22 | Up-Regulated |
| THBS2    | 2.681 | 2.2053E-24  | 5.94881E-22 | Up-Regulated |
| SOX4     | 1.139 | 2.48598E-24 | 6.5374E-22  | Up-Regulated |
| EFNA5    | 1.332 | 2.51006E-24 | 6.5374E-22  | Up-Regulated |
| RTP4     | 1.293 | 3.02265E-24 | 7.53528E-22 | Up-Regulated |
| POSTN    | 3.309 | 3.04284E-24 | 7.53528E-22 | Up-Regulated |
| IFI27    | 2.176 | 3.84702E-24 | 9.37307E-22 | Up-Regulated |
| NET1     | 1.170 | 4.25854E-24 | 1.0211E-21  | Up-Regulated |
| MSLN     | 2.889 | 4.34982E-24 | 1.02669E-21 | Up-Regulated |
| AMIGO2   | 1.687 | 4.55706E-24 | 1.05906E-21 | Up-Regulated |
| FXYD3    | 1.948 | 4.89832E-24 | 1.12112E-21 | Up-Regulated |
| DKK1     | 2.605 | 6.63757E-24 | 1.49652E-21 | Up-Regulated |
| LY6E     | 1.441 | 6.99354E-24 | 1.55359E-21 | Up-Regulated |
| OSBPL3   | 1.600 | 7.66898E-24 | 1.67895E-21 | Up-Regulated |
| KLK10    | 2.285 | 8.89584E-24 | 1.91972E-21 | Up-Regulated |
| CEACAM6  | 3.786 | 9.25046E-24 | 1.96813E-21 | Up-Regulated |
| CD9      | 1.272 | 1.16825E-23 | 2.44678E-21 | Up-Regulated |
| STEAP1   | 1.770 | 1.18241E-23 | 2.44678E-21 | Up-Regulated |
| LGALS3   | 1.412 | 1.35063E-23 | 2.75712E-21 | Up-Regulated |
| ITGA3    | 1.502 | 1.63418E-23 | 3.29145E-21 | Up-Regulated |
| NFE2L3   | 1.417 | 1.83919E-23 | 3.65563E-21 | Up-Regulated |
| SMAGP    | 1.293 | 2.08687E-23 | 4.09407E-21 | Up-Regulated |
| SESTD1   | 1.113 | 2.63383E-23 | 5.10084E-21 | Up-Regulated |
| HN1      | 1.578 | 4.4819E-23  | 8.57008E-21 | Up-Regulated |
| CKLF     | 1.335 | 6.04684E-23 | 1.1277E-20  | Up-Regulated |
| PKM      | 1.358 | 7.1455E-23  | 1.31634E-20 | Up-Regulated |
| FERMT1   | 1.786 | 7.94031E-23 | 1.44514E-20 | Up-Regulated |
| TIMP1    | 2.013 | 1.02281E-22 | 1.83936E-20 | Up-Regulated |
| CEACAM5  | 4.088 | 1.13206E-22 | 2.01187E-20 | Up-Regulated |
| FGD6     | 1.354 | 1.37605E-22 | 2.41705E-20 | Up-Regulated |
| MLPH     | 1.898 | 1.4598E-22  | 2.53468E-20 | Up-Regulated |
| CST1     | 2.898 | 1.50379E-22 | 2.54506E-20 | Up-Regulated |
| ACVR1    | 1.185 | 1.52125E-22 | 2.54506E-20 | Up-Regulated |
| CSTB     | 1.250 | 1.52762E-22 | 2.54506E-20 | Up-Regulated |
| NMU      | 2.293 | 1.53317E-22 | 2.54506E-20 | Up-Regulated |
| CDH3     | 1.672 | 1.782E-22   | 2.89738E-20 | Up-Regulated |
| KRT17    | 2.403 | 1.78377E-22 | 2.89738E-20 | Up-Regulated |
| CD55     | 1.902 | 1.90417E-22 | 3.06005E-20 | Up-Regulated |
| HK2      | 1.817 | 2.12681E-22 | 3.38186E-20 | Up-Regulated |
| VCAN     | 2.583 | 2.62213E-22 | 4.12603E-20 | Up-Regulated |
| PFKP     | 1.561 | 3.01228E-22 | 4.69108E-20 | Up-Regulated |
| PPAPDC1A | 1.987 | 3.18243E-22 | 4.90549E-20 | Up-Regulated |
| COL5A1   | 2.057 | 3.74844E-22 | 5.71959E-20 | Up-Regulated |
| CAPN8    | 2.587 | 4.6872E-22  | 7.01038E-20 | Up-Regulated |
| ISG15    | 1.789 | 4.9303E-22  | 7.30167E-20 | Up-Regulated |
| FAM19A5  | 1.674 | 5.60615E-22 | 8.22199E-20 | Up-Regulated |
| LCN2     | 3.038 | 5.72284E-22 | 8.31242E-20 | Up-Regulated |
| ANLN     | 1.890 | 6.21111E-22 | 8.93572E-20 | Up-Regulated |
| FAT1     | 1.356 | 6.38669E-22 | 9.10163E-20 | Up-Regulated |

|                 |       |             |             |              |
|-----------------|-------|-------------|-------------|--------------|
| <i>SDC4</i>     | 1.179 | 6.95445E-22 | 9.81813E-20 | Up-Regulated |
| <i>LGALS3BP</i> | 1.471 | 9.72522E-22 | 1.33554E-19 | Up-Regulated |
| <i>SAMD9</i>    | 1.562 | 9.8573E-22  | 1.34148E-19 | Up-Regulated |
| <i>KCNN4</i>    | 1.514 | 1.09322E-21 | 1.47448E-19 | Up-Regulated |
| <i>MGLL</i>     | 1.511 | 1.19484E-21 | 1.5695E-19  | Up-Regulated |
| <i>MARCKSL1</i> | 1.422 | 1.45721E-21 | 1.86548E-19 | Up-Regulated |
| <i>OSBPL10</i>  | 1.299 | 1.50942E-21 | 1.91608E-19 | Up-Regulated |
| <i>SLC2A1</i>   | 1.558 | 1.6045E-21  | 2.0198E-19  | Up-Regulated |
| <i>C19orf33</i> | 2.277 | 1.65881E-21 | 2.05393E-19 | Up-Regulated |
| <i>EFNB2</i>    | 1.717 | 2.37555E-21 | 2.91748E-19 | Up-Regulated |
| <i>SMYD3</i>    | 1.028 | 2.67288E-21 | 3.20448E-19 | Up-Regulated |
| <i>TMC5</i>     | 2.298 | 3.15814E-21 | 3.7271E-19  | Up-Regulated |
| <i>KCNK1</i>    | 1.745 | 4.20417E-21 | 4.92312E-19 | Up-Regulated |
| <i>ECT2</i>     | 1.224 | 4.30037E-21 | 4.99703E-19 | Up-Regulated |
| <i>MAP4K4</i>   | 1.029 | 5.36191E-21 | 6.13614E-19 | Up-Regulated |
| <i>AHR</i>      | 1.388 | 5.47428E-21 | 6.18614E-19 | Up-Regulated |
| <i>TSPO</i>     | 1.081 | 5.48751E-21 | 6.18614E-19 | Up-Regulated |
| <i>PMEPA1</i>   | 1.536 | 5.77557E-21 | 6.45603E-19 | Up-Regulated |
| <i>TM4SF1</i>   | 1.513 | 5.81239E-21 | 6.45603E-19 | Up-Regulated |
| <i>SYTL2</i>    | 1.578 | 5.98494E-21 | 6.59917E-19 | Up-Regulated |
| <i>COL3A1</i>   | 2.181 | 6.32843E-21 | 6.92733E-19 | Up-Regulated |
| <i>C1orf106</i> | 1.908 | 6.64896E-21 | 7.22584E-19 | Up-Regulated |
| <i>NBL1</i>     | 1.346 | 8.69175E-21 | 9.34735E-19 | Up-Regulated |
| <i>MTMR11</i>   | 1.381 | 8.72486E-21 | 9.34735E-19 | Up-Regulated |
| <i>FZD2</i>     | 1.138 | 9.1288E-21  | 9.71124E-19 | Up-Regulated |
| <i>BPGM</i>     | 1.144 | 1.14898E-20 | 1.197E-18   | Up-Regulated |
| <i>ABHD17C</i>  | 1.880 | 1.40076E-20 | 1.43944E-18 | Up-Regulated |
| <i>HOXC6</i>    | 2.015 | 1.69996E-20 | 1.73511E-18 | Up-Regulated |
| <i>NTM</i>      | 1.360 | 2.01553E-20 | 2.01235E-18 | Up-Regulated |
| <i>SFTA2</i>    | 2.327 | 2.40885E-20 | 2.3783E-18  | Up-Regulated |
| <i>SULF2</i>    | 1.863 | 2.44863E-20 | 2.40188E-18 | Up-Regulated |
| <i>MPZL2</i>    | 1.184 | 2.48877E-20 | 2.42551E-18 | Up-Regulated |
| <i>MST1R</i>    | 1.477 | 2.56504E-20 | 2.48382E-18 | Up-Regulated |
| <i>SPON2</i>    | 1.328 | 2.7176E-20  | 2.61478E-18 | Up-Regulated |
| <i>LEMD1</i>    | 1.882 | 3.5026E-20  | 3.34875E-18 | Up-Regulated |
| <i>JUP</i>      | 1.270 | 3.7489E-20  | 3.56169E-18 | Up-Regulated |
| <i>TMPRSS3</i>  | 1.573 | 3.77929E-20 | 3.56812E-18 | Up-Regulated |
| <i>AGR2</i>     | 2.754 | 3.91238E-20 | 3.67083E-18 | Up-Regulated |
| <i>INPP4B</i>   | 1.572 | 4.11524E-20 | 3.81379E-18 | Up-Regulated |
| <i>APOL1</i>    | 1.015 | 4.44019E-20 | 4.08985E-18 | Up-Regulated |
| <i>LTBP1</i>    | 1.244 | 4.74966E-20 | 4.34839E-18 | Up-Regulated |
| <i>PCDH7</i>    | 1.370 | 5.14774E-20 | 4.68444E-18 | Up-Regulated |
| <i>XAF1</i>     | 1.794 | 6.10238E-20 | 5.39079E-18 | Up-Regulated |
| <i>PLAUR</i>    | 1.502 | 6.62283E-20 | 5.81654E-18 | Up-Regulated |
| <i>KRT23</i>    | 2.223 | 7.04892E-20 | 6.15497E-18 | Up-Regulated |
| <i>KLF5</i>     | 2.085 | 7.29281E-20 | 6.33133E-18 | Up-Regulated |
| <i>CAP1</i>     | 1.128 | 7.81989E-20 | 6.75013E-18 | Up-Regulated |
| <i>RAI14</i>    | 1.204 | 8.56561E-20 | 7.35182E-18 | Up-Regulated |
| <i>SRPX2</i>    | 1.435 | 9.36647E-20 | 7.94887E-18 | Up-Regulated |
| <i>PLAT</i>     | 2.093 | 9.4624E-20  | 7.98542E-18 | Up-Regulated |
| <i>NPC1</i>     | 1.184 | 9.79753E-20 | 8.2223E-18  | Up-Regulated |
| <i>EPHX4</i>    | 1.131 | 1.02922E-19 | 8.54249E-18 | Up-Regulated |

|                |       |             |             |              |
|----------------|-------|-------------|-------------|--------------|
| <i>TRIM59</i>  | 1.357 | 1.03671E-19 | 8.55767E-18 | Up-Regulated |
| <i>RRAS</i>    | 1.120 | 1.06038E-19 | 8.70553E-18 | Up-Regulated |
| <i>CST4</i>    | 1.359 | 1.53495E-19 | 1.22682E-17 | Up-Regulated |
| <i>ANKRD22</i> | 1.468 | 1.70526E-19 | 1.35577E-17 | Up-Regulated |
| <i>ITPR3</i>   | 1.044 | 1.74898E-19 | 1.38325E-17 | Up-Regulated |
| <i>GABRP</i>   | 3.114 | 1.91682E-19 | 1.50809E-17 | Up-Regulated |
| <i>DKK3</i>    | 1.346 | 1.94999E-19 | 1.52625E-17 | Up-Regulated |
| <i>SPARC</i>   | 1.835 | 2.12078E-19 | 1.62573E-17 | Up-Regulated |
| <i>B4GALT5</i> | 1.059 | 2.21415E-19 | 1.68075E-17 | Up-Regulated |
| <i>ANXA3</i>   | 1.651 | 2.34191E-19 | 1.76884E-17 | Up-Regulated |
| <i>FXYD5</i>   | 1.535 | 2.47063E-19 | 1.84759E-17 | Up-Regulated |
| <i>RAB31</i>   | 1.866 | 2.73711E-19 | 2.03678E-17 | Up-Regulated |
| <i>PLAU</i>    | 1.695 | 2.75283E-19 | 2.03844E-17 | Up-Regulated |
| <i>BHLHE40</i> | 1.302 | 2.80005E-19 | 2.0633E-17  | Up-Regulated |
| <i>COL6A3</i>  | 1.795 | 2.8611E-19  | 2.08791E-17 | Up-Regulated |
| <i>FOXQ1</i>   | 2.130 | 3.01042E-19 | 2.18632E-17 | Up-Regulated |
| <i>MCU</i>     | 1.158 | 3.13963E-19 | 2.26924E-17 | Up-Regulated |
| <i>KYNU</i>    | 1.413 | 3.85769E-19 | 2.76181E-17 | Up-Regulated |
| <i>TNFSF4</i>  | 1.336 | 4.01772E-19 | 2.86281E-17 | Up-Regulated |
| <i>OLFML2B</i> | 1.926 | 4.0393E-19  | 2.86468E-17 | Up-Regulated |
| <i>PRKCI</i>   | 1.072 | 4.09814E-19 | 2.87937E-17 | Up-Regulated |
| <i>SPOCK1</i>  | 1.585 | 4.15053E-19 | 2.90268E-17 | Up-Regulated |
| <i>RACGAP1</i> | 1.419 | 4.56045E-19 | 3.1601E-17  | Up-Regulated |
| <i>TMSB10</i>  | 1.205 | 5.59327E-19 | 3.84054E-17 | Up-Regulated |
| <i>ENO2</i>    | 1.475 | 6.4911E-19  | 4.43686E-17 | Up-Regulated |
| <i>NMI</i>     | 1.158 | 7.3301E-19  | 4.98777E-17 | Up-Regulated |
| <i>GALNT5</i>  | 1.265 | 7.44558E-19 | 5.04363E-17 | Up-Regulated |
| <i>FAP</i>     | 2.128 | 7.56228E-19 | 5.09981E-17 | Up-Regulated |
| <i>GPX8</i>    | 1.353 | 8.32964E-19 | 5.52453E-17 | Up-Regulated |
| <i>SGPP2</i>   | 1.936 | 9.02938E-19 | 5.95624E-17 | Up-Regulated |
| <i>STYK1</i>   | 1.455 | 1.03591E-18 | 6.80369E-17 | Up-Regulated |
| <i>DDX60</i>   | 1.454 | 1.24758E-18 | 8.11378E-17 | Up-Regulated |
| <i>SGIP1</i>   | 1.100 | 1.32494E-18 | 8.51685E-17 | Up-Regulated |
| <i>SLC24A3</i> | 1.224 | 1.33326E-18 | 8.53401E-17 | Up-Regulated |
| <i>EFNA1</i>   | 1.186 | 1.56813E-18 | 9.78849E-17 | Up-Regulated |
| <i>BACE2</i>   | 1.036 | 1.74271E-18 | 1.08335E-16 | Up-Regulated |
| <i>COL4A1</i>  | 1.488 | 1.77377E-18 | 1.09814E-16 | Up-Regulated |
| <i>PALLD</i>   | 1.644 | 1.92738E-18 | 1.18354E-16 | Up-Regulated |
| <i>VCL</i>     | 1.026 | 1.94015E-18 | 1.18656E-16 | Up-Regulated |
| <i>MMP28</i>   | 1.264 | 1.97516E-18 | 1.20262E-16 | Up-Regulated |
| <i>IFI44</i>   | 1.484 | 1.98233E-18 | 1.20262E-16 | Up-Regulated |
| <i>PNMA1</i>   | 1.363 | 2.0156E-18  | 1.21791E-16 | Up-Regulated |
| <i>SEMA3C</i>  | 1.930 | 2.06285E-18 | 1.23656E-16 | Up-Regulated |
| <i>S100A4</i>  | 1.891 | 2.18637E-18 | 1.30029E-16 | Up-Regulated |
| <i>STIL</i>    | 1.006 | 2.22737E-18 | 1.31948E-16 | Up-Regulated |
| <i>PRC1</i>    | 1.267 | 2.37343E-18 | 1.39506E-16 | Up-Regulated |
| <i>ACTN1</i>   | 1.056 | 2.64075E-18 | 1.54617E-16 | Up-Regulated |
| <i>TPM4</i>    | 1.102 | 2.73351E-18 | 1.58707E-16 | Up-Regulated |
| <i>ZNF532</i>  | 1.159 | 2.74213E-18 | 1.58707E-16 | Up-Regulated |
| <i>AEBP1</i>   | 1.840 | 3.13313E-18 | 1.80645E-16 | Up-Regulated |
| <i>OAS3</i>    | 1.022 | 3.29969E-18 | 1.89525E-16 | Up-Regulated |
| <i>PLEK2</i>   | 1.196 | 3.32845E-18 | 1.90261E-16 | Up-Regulated |

|                 |       |             |             |              |
|-----------------|-------|-------------|-------------|--------------|
| <i>C1GALT1</i>  | 1.198 | 3.55139E-18 | 2.00926E-16 | Up-Regulated |
| <i>KDELC1</i>   | 1.285 | 4.06469E-18 | 2.27412E-16 | Up-Regulated |
| <i>ECM1</i>     | 1.293 | 4.17247E-18 | 2.30877E-16 | Up-Regulated |
| <i>LIPH</i>     | 1.393 | 4.28271E-18 | 2.36112E-16 | Up-Regulated |
| <i>NUAK1</i>    | 1.308 | 4.40085E-18 | 2.39997E-16 | Up-Regulated |
| <i>LIMS1</i>    | 1.056 | 4.94723E-18 | 2.6501E-16  | Up-Regulated |
| <i>EPS8</i>     | 1.214 | 5.0295E-18  | 2.67995E-16 | Up-Regulated |
| <i>STEAP2</i>   | 1.081 | 5.99628E-18 | 3.10845E-16 | Up-Regulated |
| <i>CEP55</i>    | 1.535 | 6.00866E-18 | 3.10845E-16 | Up-Regulated |
| <i>COL12A1</i>  | 1.991 | 6.12271E-18 | 3.14778E-16 | Up-Regulated |
| <i>TRIB2</i>    | 1.280 | 6.12635E-18 | 3.14778E-16 | Up-Regulated |
| <i>FNDC1</i>    | 2.137 | 6.18868E-18 | 3.16902E-16 | Up-Regulated |
| <i>PPL</i>      | 1.259 | 6.2734E-18  | 3.20155E-16 | Up-Regulated |
| <i>WISP1</i>    | 1.376 | 6.3148E-18  | 3.21183E-16 | Up-Regulated |
| <i>SLC16A4</i>  | 1.625 | 7.102E-18   | 3.58806E-16 | Up-Regulated |
| <i>PI3</i>      | 1.712 | 7.21087E-18 | 3.63091E-16 | Up-Regulated |
| <i>GPX2</i>     | 2.203 | 7.74425E-18 | 3.87366E-16 | Up-Regulated |
| <i>SPAG1</i>    | 1.290 | 8.67938E-18 | 4.29871E-16 | Up-Regulated |
| <i>COL4A2</i>   | 1.442 | 8.86198E-18 | 4.37481E-16 | Up-Regulated |
| <i>NCEH1</i>    | 1.420 | 9.50648E-18 | 4.64741E-16 | Up-Regulated |
| <i>CRIP1</i>    | 1.967 | 9.68521E-18 | 4.71951E-16 | Up-Regulated |
| <i>SMS</i>      | 1.119 | 1.02033E-17 | 4.95599E-16 | Up-Regulated |
| <i>LOXL1</i>    | 1.559 | 1.03237E-17 | 4.96659E-16 | Up-Regulated |
| <i>AK4</i>      | 1.202 | 1.20991E-17 | 5.75807E-16 | Up-Regulated |
| <i>OAS1</i>     | 1.373 | 1.2353E-17  | 5.83603E-16 | Up-Regulated |
| <i>WNT5A</i>    | 1.291 | 1.23628E-17 | 5.83603E-16 | Up-Regulated |
| <i>TGFBI</i>    | 1.478 | 1.26796E-17 | 5.94838E-16 | Up-Regulated |
| <i>COMP</i>     | 2.410 | 1.34936E-17 | 6.31068E-16 | Up-Regulated |
| <i>PON2</i>     | 1.153 | 1.3991E-17  | 6.47403E-16 | Up-Regulated |
| <i>MELK</i>     | 1.344 | 1.55736E-17 | 7.10741E-16 | Up-Regulated |
| <i>BGN</i>      | 1.586 | 1.59439E-17 | 7.25449E-16 | Up-Regulated |
| <i>PRRG1</i>    | 1.113 | 1.62923E-17 | 7.39075E-16 | Up-Regulated |
| <i>TMEM158</i>  | 1.604 | 2.11202E-17 | 9.35939E-16 | Up-Regulated |
| <i>MMP7</i>     | 2.582 | 2.11277E-17 | 9.35939E-16 | Up-Regulated |
| <i>MFAP2</i>    | 1.436 | 2.25372E-17 | 9.9546E-16  | Up-Regulated |
| <i>MX1</i>      | 1.383 | 2.36066E-17 | 1.03362E-15 | Up-Regulated |
| <i>LDHA</i>     | 1.038 | 2.41231E-17 | 1.05015E-15 | Up-Regulated |
| <i>RSAD2</i>    | 1.336 | 2.68468E-17 | 1.16203E-15 | Up-Regulated |
| <i>TCN1</i>     | 2.807 | 2.69243E-17 | 1.16205E-15 | Up-Regulated |
| <i>EPPK1</i>    | 1.470 | 2.78442E-17 | 1.19833E-15 | Up-Regulated |
| <i>TMEM200A</i> | 1.866 | 3.09337E-17 | 1.32375E-15 | Up-Regulated |
| <i>MICALL2</i>  | 1.026 | 3.11866E-17 | 1.3308E-15  | Up-Regulated |
| <i>GCNT3</i>    | 2.276 | 3.24691E-17 | 1.37775E-15 | Up-Regulated |
| <i>MAL2</i>     | 1.980 | 3.71409E-17 | 1.56718E-15 | Up-Regulated |
| <i>SQLE</i>     | 1.101 | 3.96162E-17 | 1.65316E-15 | Up-Regulated |
| <i>TIGD1</i>    | 1.022 | 4.25751E-17 | 1.76202E-15 | Up-Regulated |
| <i>TOP2A</i>    | 2.074 | 5.65143E-17 | 2.29491E-15 | Up-Regulated |
| <i>CORO1C</i>   | 1.165 | 5.99609E-17 | 2.41539E-15 | Up-Regulated |
| <i>MXRA8</i>    | 1.046 | 6.28608E-17 | 2.52E-15    | Up-Regulated |
| <i>THY1</i>     | 1.339 | 6.28914E-17 | 2.52E-15    | Up-Regulated |
| <i>MMP11</i>    | 1.411 | 6.40908E-17 | 2.5545E-15  | Up-Regulated |
| <i>CLIC1</i>    | 1.023 | 6.58877E-17 | 2.61233E-15 | Up-Regulated |

|                  |       |             |                          |
|------------------|-------|-------------|--------------------------|
| <i>CTSB</i>      | 1.060 | 6.75911E-17 | 2.65894E-15 Up-Regulated |
| <i>ZG16B</i>     | 1.795 | 7.33611E-17 | 2.84152E-15 Up-Regulated |
| <i>OLR1</i>      | 2.105 | 8.03876E-17 | 3.07427E-15 Up-Regulated |
| <i>SLC9B2</i>    | 1.031 | 8.22732E-17 | 3.13843E-15 Up-Regulated |
| <i>TFF1</i>      | 3.213 | 8.83286E-17 | 3.32741E-15 Up-Regulated |
| <i>MMP1</i>      | 3.116 | 8.92279E-17 | 3.35293E-15 Up-Regulated |
| <i>CDH11</i>     | 1.338 | 1.03343E-16 | 3.81742E-15 Up-Regulated |
| <i>CEP170</i>    | 1.217 | 1.1912E-16  | 4.35695E-15 Up-Regulated |
| <i>TGFB11I</i>   | 1.373 | 1.32404E-16 | 4.7849E-15 Up-Regulated  |
| <i>LY75</i>      | 1.845 | 1.35219E-16 | 4.85183E-15 Up-Regulated |
| <i>KIF14</i>     | 1.181 | 1.48625E-16 | 5.30763E-15 Up-Regulated |
| <i>GPR137B</i>   | 1.372 | 1.5115E-16  | 5.3724E-15 Up-Regulated  |
| <i>KPNA2</i>     | 1.169 | 1.53669E-16 | 5.44913E-15 Up-Regulated |
| <i>ARL4C</i>     | 1.320 | 1.60701E-16 | 5.67183E-15 Up-Regulated |
| <i>OPN3</i>      | 1.080 | 1.89396E-16 | 6.60744E-15 Up-Regulated |
| <i>YWHAZ</i>     | 1.015 | 1.9324E-16  | 6.72598E-15 Up-Regulated |
| <i>SLC39A10</i>  | 1.140 | 1.9613E-16  | 6.81089E-15 Up-Regulated |
| <i>CMTM3</i>     | 1.005 | 2.07359E-16 | 7.15152E-15 Up-Regulated |
| <i>ATP2B4</i>    | 1.122 | 2.09161E-16 | 7.18186E-15 Up-Regulated |
| <i>CXCL5</i>     | 2.714 | 2.22186E-16 | 7.57095E-15 Up-Regulated |
| <i>SRGAP2B</i>   | 1.127 | 2.25556E-16 | 7.65673E-15 Up-Regulated |
| <i>MSMO1</i>     | 1.215 | 2.28505E-16 | 7.72215E-15 Up-Regulated |
| <i>HOXB2</i>     | 1.124 | 2.31411E-16 | 7.80288E-15 Up-Regulated |
| <i>NT5DC2</i>    | 1.180 | 2.40667E-16 | 8.0216E-15 Up-Regulated  |
| <i>FKBP7</i>     | 1.174 | 3.0456E-16  | 9.97977E-15 Up-Regulated |
| <i>PMAIP1</i>    | 1.513 | 3.05557E-16 | 9.99078E-15 Up-Regulated |
| <i>CCL20</i>     | 2.283 | 3.07064E-16 | 1.00184E-14 Up-Regulated |
| <i>CKS2</i>      | 1.816 | 3.2139E-16  | 1.04371E-14 Up-Regulated |
| <i>CENPU</i>     | 1.441 | 3.24358E-16 | 1.04618E-14 Up-Regulated |
| <i>MALL</i>      | 1.746 | 3.24811E-16 | 1.04618E-14 Up-Regulated |
| <i>YWHAB</i>     | 1.005 | 3.31212E-16 | 1.06227E-14 Up-Regulated |
| <i>EDNRA</i>     | 1.782 | 3.34831E-16 | 1.0716E-14 Up-Regulated  |
| <i>COL16A1</i>   | 1.193 | 3.3594E-16  | 1.07288E-14 Up-Regulated |
| <i>BEAN1</i>     | 1.118 | 3.38959E-16 | 1.08024E-14 Up-Regulated |
| <i>BAIAP2L1</i>  | 1.167 | 3.46907E-16 | 1.09861E-14 Up-Regulated |
| <i>PLXDC2</i>    | 1.344 | 3.87247E-16 | 1.21364E-14 Up-Regulated |
| <i>NDC80</i>     | 1.431 | 4.33743E-16 | 1.34817E-14 Up-Regulated |
| <i>LRRN1</i>     | 1.442 | 4.37089E-16 | 1.35473E-14 Up-Regulated |
| <i>CTSK</i>      | 1.657 | 4.52339E-16 | 1.39166E-14 Up-Regulated |
| <i>FAM83H</i>    | 1.013 | 5.10153E-16 | 1.55593E-14 Up-Regulated |
| <i>MX2</i>       | 1.116 | 5.47241E-16 | 1.65664E-14 Up-Regulated |
| <i>LGALS1</i>    | 1.589 | 5.93138E-16 | 1.77777E-14 Up-Regulated |
| <i>TRIM29</i>    | 1.230 | 6.16585E-16 | 1.83727E-14 Up-Regulated |
| <i>TXN</i>       | 1.012 | 6.17749E-16 | 1.83727E-14 Up-Regulated |
| <i>TNFAIP6</i>   | 1.771 | 6.17858E-16 | 1.83727E-14 Up-Regulated |
| <i>ANXA1</i>     | 1.519 | 6.74158E-16 | 1.98129E-14 Up-Regulated |
| <i>DACT1</i>     | 1.484 | 6.99529E-16 | 2.04788E-14 Up-Regulated |
| <i>CST2</i>      | 1.255 | 7.16182E-16 | 2.08854E-14 Up-Regulated |
| <i>HIST2H2BE</i> | 1.308 | 7.55608E-16 | 2.18663E-14 Up-Regulated |
| <i>HK1</i>       | 1.091 | 7.64906E-16 | 2.20509E-14 Up-Regulated |
| <i>SLC44A4</i>   | 1.777 | 9.6845E-16  | 2.72937E-14 Up-Regulated |
| <i>F5</i>        | 1.562 | 9.9096E-16  | 2.78242E-14 Up-Regulated |

|                  |       |             |             |              |
|------------------|-------|-------------|-------------|--------------|
| <i>CD58</i>      | 1.223 | 1.00986E-15 | 2.83022E-14 | Up-Regulated |
| <i>ADAM9</i>     | 1.407 | 1.02266E-15 | 2.86081E-14 | Up-Regulated |
| <i>ERO1L</i>     | 1.161 | 1.14599E-15 | 3.15325E-14 | Up-Regulated |
| <i>SH3KBP1</i>   | 1.431 | 1.15764E-15 | 3.17951E-14 | Up-Regulated |
| <i>PANX1</i>     | 1.020 | 1.18528E-15 | 3.24951E-14 | Up-Regulated |
| <i>GBP2</i>      | 1.186 | 1.26479E-15 | 3.4425E-14  | Up-Regulated |
| <i>IFI6</i>      | 1.684 | 1.34166E-15 | 3.6321E-14  | Up-Regulated |
| <i>PPFIBP1</i>   | 1.043 | 1.38446E-15 | 3.72129E-14 | Up-Regulated |
| <i>VASP</i>      | 1.011 | 1.48913E-15 | 3.95339E-14 | Up-Regulated |
| <i>FRMD6</i>     | 1.312 | 1.65809E-15 | 4.37121E-14 | Up-Regulated |
| <i>SLC12A2</i>   | 1.255 | 1.82547E-15 | 4.79574E-14 | Up-Regulated |
| <i>WNT2</i>      | 1.150 | 1.86012E-15 | 4.84466E-14 | Up-Regulated |
| <i>SHROOM3</i>   | 1.322 | 1.87381E-15 | 4.8719E-14  | Up-Regulated |
| <i>CXCL8</i>     | 2.250 | 2.06172E-15 | 5.29666E-14 | Up-Regulated |
| <i>PCDHB10</i>   | 1.085 | 2.13187E-15 | 5.4583E-14  | Up-Regulated |
| <i>BCL10</i>     | 1.016 | 2.36054E-15 | 5.98897E-14 | Up-Regulated |
| <i>TNFAIP2</i>   | 1.051 | 2.36292E-15 | 5.98897E-14 | Up-Regulated |
| <i>DPYSL3</i>    | 1.416 | 2.3915E-15  | 6.04113E-14 | Up-Regulated |
| <i>GRHL1</i>     | 1.044 | 2.77137E-15 | 6.89691E-14 | Up-Regulated |
| <i>DUOX2</i>     | 2.509 | 2.8058E-15  | 6.94826E-14 | Up-Regulated |
| <i>KIF20A</i>    | 1.135 | 2.87583E-15 | 7.11003E-14 | Up-Regulated |
| <i>IGF2BP2</i>   | 1.138 | 3.10675E-15 | 7.59393E-14 | Up-Regulated |
| <i>SGK223</i>    | 1.055 | 3.12857E-15 | 7.63493E-14 | Up-Regulated |
| <i>MIA</i>       | 1.458 | 3.27425E-15 | 7.92641E-14 | Up-Regulated |
| <i>CORO2A</i>    | 1.494 | 3.43756E-15 | 8.25561E-14 | Up-Regulated |
| <i>PXDN</i>      | 1.352 | 3.93118E-15 | 9.39626E-14 | Up-Regulated |
| <i>HEPH</i>      | 1.703 | 4.27913E-15 | 1.01001E-13 | Up-Regulated |
| <i>MDK</i>       | 1.407 | 4.37578E-15 | 1.03121E-13 | Up-Regulated |
| <i>CAMK2N1</i>   | 1.069 | 4.42386E-15 | 1.03447E-13 | Up-Regulated |
| <i>NUSAP1</i>    | 1.264 | 4.86734E-15 | 1.13014E-13 | Up-Regulated |
| <i>TWIST1</i>    | 1.532 | 4.87368E-15 | 1.13014E-13 | Up-Regulated |
| <i>ITGB6</i>     | 1.716 | 5.35752E-15 | 1.23558E-13 | Up-Regulated |
| <i>MMP2</i>      | 1.571 | 5.74944E-15 | 1.31393E-13 | Up-Regulated |
| <i>EPS8L1</i>    | 1.096 | 5.78189E-15 | 1.31736E-13 | Up-Regulated |
| <i>SIPA1L2</i>   | 1.028 | 6.21682E-15 | 1.4122E-13  | Up-Regulated |
| <i>EPHA2</i>     | 1.110 | 7.12237E-15 | 1.60344E-13 | Up-Regulated |
| <i>EPST11</i>    | 1.169 | 7.36535E-15 | 1.64344E-13 | Up-Regulated |
| <i>GOLM1</i>     | 1.259 | 7.88583E-15 | 1.73903E-13 | Up-Regulated |
| <i>ZWINT</i>     | 1.281 | 9.18079E-15 | 2.00412E-13 | Up-Regulated |
| <i>PCDHB14</i>   | 1.128 | 9.9268E-15  | 2.14527E-13 | Up-Regulated |
| <i>PERP</i>      | 1.298 | 9.99365E-15 | 2.15355E-13 | Up-Regulated |
| <i>ISLR</i>      | 1.504 | 1.04452E-14 | 2.24126E-13 | Up-Regulated |
| <i>NPR3</i>      | 1.491 | 1.05178E-14 | 2.25365E-13 | Up-Regulated |
| <i>PLOD2</i>     | 1.068 | 1.07931E-14 | 2.30609E-13 | Up-Regulated |
| <i>DPCR1</i>     | 2.320 | 1.13321E-14 | 2.41442E-13 | Up-Regulated |
| <i>SERPINH1</i>  | 1.264 | 1.19385E-14 | 2.52228E-13 | Up-Regulated |
| <i>RARRES3</i>   | 1.444 | 1.19768E-14 | 2.52453E-13 | Up-Regulated |
| <i>CENPW</i>     | 1.121 | 1.21959E-14 | 2.5659E-13  | Up-Regulated |
| <i>DFNA5</i>     | 1.012 | 1.31129E-14 | 2.73554E-13 | Up-Regulated |
| <i>HIST1H2BD</i> | 1.231 | 1.72907E-14 | 3.52964E-13 | Up-Regulated |
| <i>CENPK</i>     | 1.466 | 1.8014E-14  | 3.67233E-13 | Up-Regulated |
| <i>S100A2</i>    | 1.904 | 1.83378E-14 | 3.73331E-13 | Up-Regulated |

|            |       |             |             |              |
|------------|-------|-------------|-------------|--------------|
| LAMB1      | 1.167 | 2.09315E-14 | 4.19908E-13 | Up-Regulated |
| CCNB1      | 1.303 | 2.32886E-14 | 4.59657E-13 | Up-Regulated |
| MN1        | 1.311 | 3.07782E-14 | 5.95407E-13 | Up-Regulated |
| GREM1      | 2.467 | 3.09335E-14 | 5.96784E-13 | Up-Regulated |
| RHPN2      | 1.428 | 3.12839E-14 | 6.02557E-13 | Up-Regulated |
| ANXA10     | 2.381 | 3.2268E-14  | 6.1858E-13  | Up-Regulated |
| CDCA7      | 1.553 | 3.34621E-14 | 6.3823E-13  | Up-Regulated |
| F2R        | 1.090 | 3.49847E-14 | 6.64753E-13 | Up-Regulated |
| MACC1      | 1.086 | 4.00144E-14 | 7.50878E-13 | Up-Regulated |
| ITGB1      | 1.152 | 4.48617E-14 | 8.32531E-13 | Up-Regulated |
| RARRES1    | 1.974 | 4.7124E-14  | 8.70238E-13 | Up-Regulated |
| F3         | 1.054 | 4.80561E-14 | 8.84209E-13 | Up-Regulated |
| EGLN3      | 1.353 | 4.87081E-14 | 8.91008E-13 | Up-Regulated |
| TUFT1      | 1.089 | 5.38506E-14 | 9.67261E-13 | Up-Regulated |
| PRR15      | 1.380 | 5.79512E-14 | 1.03232E-12 | Up-Regulated |
| ARHGAP42   | 1.096 | 5.87083E-14 | 1.04458E-12 | Up-Regulated |
| MATN3      | 1.764 | 5.94879E-14 | 1.05721E-12 | Up-Regulated |
| VILL       | 1.380 | 6.14047E-14 | 1.08491E-12 | Up-Regulated |
| PDGFRB     | 1.062 | 6.3265E-14  | 1.11255E-12 | Up-Regulated |
| KIAA0101   | 1.130 | 6.56639E-14 | 1.15072E-12 | Up-Regulated |
| BUB1B      | 1.243 | 6.57914E-14 | 1.15162E-12 | Up-Regulated |
| FAM213B    | 1.012 | 7.32318E-14 | 1.26862E-12 | Up-Regulated |
| SERPINA1   | 1.716 | 7.33583E-14 | 1.26936E-12 | Up-Regulated |
| ZNF365     | 1.079 | 7.55467E-14 | 1.30424E-12 | Up-Regulated |
| ASPN       | 1.422 | 8.02843E-14 | 1.37347E-12 | Up-Regulated |
| GALNT4     | 1.152 | 8.29722E-14 | 1.41146E-12 | Up-Regulated |
| S100A14    | 1.276 | 8.35303E-14 | 1.41936E-12 | Up-Regulated |
| ASPHD2     | 1.013 | 8.36892E-14 | 1.42046E-12 | Up-Regulated |
| IFI44L     | 1.567 | 8.58892E-14 | 1.45453E-12 | Up-Regulated |
| LUM        | 1.234 | 8.7128E-14  | 1.47291E-12 | Up-Regulated |
| IL18       | 1.261 | 8.87455E-14 | 1.49619E-12 | Up-Regulated |
| C1orf116   | 1.277 | 8.89306E-14 | 1.49764E-12 | Up-Regulated |
| DLGAP5     | 1.323 | 9.52373E-14 | 1.58792E-12 | Up-Regulated |
| HIST1H2AC  | 1.115 | 9.75386E-14 | 1.62092E-12 | Up-Regulated |
| NDNF       | 1.081 | 1.01828E-13 | 1.68664E-12 | Up-Regulated |
| CLDN18     | 2.542 | 1.06104E-13 | 1.75554E-12 | Up-Regulated |
| SUGCT      | 1.128 | 1.06298E-13 | 1.75683E-12 | Up-Regulated |
| RAB34      | 1.109 | 1.09476E-13 | 1.80146E-12 | Up-Regulated |
| LBH        | 1.101 | 1.1385E-13  | 1.86532E-12 | Up-Regulated |
| COL1A1     | 1.345 | 1.15758E-13 | 1.89452E-12 | Up-Regulated |
| KRT8       | 1.419 | 1.16049E-13 | 1.89723E-12 | Up-Regulated |
| LIF        | 1.126 | 1.23973E-13 | 2.01585E-12 | Up-Regulated |
| ARPC1B     | 1.233 | 1.60263E-13 | 2.535E-12   | Up-Regulated |
| ST6GALNAC1 | 1.959 | 1.63561E-13 | 2.57638E-12 | Up-Regulated |
| CLDN1      | 1.419 | 1.68431E-13 | 2.64207E-12 | Up-Regulated |
| LRRC15     | 1.085 | 1.89821E-13 | 2.92305E-12 | Up-Regulated |
| BCAS1      | 1.197 | 2.04639E-13 | 3.12249E-12 | Up-Regulated |
| TIMP2      | 1.062 | 2.05992E-13 | 3.13998E-12 | Up-Regulated |
| NEK2       | 1.128 | 2.21945E-13 | 3.36617E-12 | Up-Regulated |
| GINS1      | 1.102 | 2.22607E-13 | 3.37281E-12 | Up-Regulated |
| DTL        | 1.103 | 2.3368E-13  | 3.52644E-12 | Up-Regulated |
| FBN1       | 1.455 | 2.46313E-13 | 3.70968E-12 | Up-Regulated |



|                   |       |             |             |              |
|-------------------|-------|-------------|-------------|--------------|
| <i>VSIG2</i>      | 1.163 | 2.47333E-13 | 3.72133E-12 | Up-Regulated |
| <i>MXD1</i>       | 1.308 | 2.61033E-13 | 3.90026E-12 | Up-Regulated |
| <i>IGFL2</i>      | 1.096 | 2.72275E-13 | 4.04821E-12 | Up-Regulated |
| <i>CSGALNACT2</i> | 1.054 | 2.74257E-13 | 4.07368E-12 | Up-Regulated |
| <i>LIMA1</i>      | 1.291 | 2.92145E-13 | 4.29712E-12 | Up-Regulated |
| <i>CXCL3</i>      | 1.599 | 3.02208E-13 | 4.4279E-12  | Up-Regulated |
| <i>FA2H</i>       | 1.100 | 3.08748E-13 | 4.51059E-12 | Up-Regulated |
| <i>PTPRR</i>      | 1.226 | 3.68252E-13 | 5.27281E-12 | Up-Regulated |
| <i>TRNP1</i>      | 1.066 | 3.68829E-13 | 5.27607E-12 | Up-Regulated |
| <i>LAMP5</i>      | 1.428 | 4.08386E-13 | 5.74938E-12 | Up-Regulated |
| <i>AOC1</i>       | 2.178 | 4.14177E-13 | 5.82547E-12 | Up-Regulated |
| <i>ANXA8L1</i>    | 1.445 | 4.81922E-13 | 6.70959E-12 | Up-Regulated |
| <i>CDC20</i>      | 1.255 | 4.87416E-13 | 6.77983E-12 | Up-Regulated |
| <i>FAM83D</i>     | 1.515 | 5.12608E-13 | 7.0846E-12  | Up-Regulated |
| <i>FSCN1</i>      | 1.005 | 5.74227E-13 | 7.84292E-12 | Up-Regulated |
| <i>GSDMB</i>      | 1.077 | 6.62235E-13 | 8.90803E-12 | Up-Regulated |
| <i>RNF183</i>     | 1.186 | 6.81454E-13 | 9.10171E-12 | Up-Regulated |
| <i>PTTG1</i>      | 1.089 | 7.25558E-13 | 9.63118E-12 | Up-Regulated |
| <i>SERPINB2</i>   | 1.831 | 7.51731E-13 | 9.93495E-12 | Up-Regulated |
| <i>C1QTNF3</i>    | 1.038 | 8.28342E-13 | 1.08431E-11 | Up-Regulated |
| <i>CDC42EP5</i>   | 1.369 | 8.56337E-13 | 1.1142E-11  | Up-Regulated |
| <i>NNMT</i>       | 1.499 | 8.61793E-13 | 1.11937E-11 | Up-Regulated |
| <i>IL1R2</i>      | 1.360 | 9.42321E-13 | 1.21138E-11 | Up-Regulated |
| <i>AURKA</i>      | 1.088 | 9.48464E-13 | 1.21729E-11 | Up-Regulated |
| <i>FZD7</i>       | 1.105 | 9.92186E-13 | 1.26695E-11 | Up-Regulated |
| <i>IFIT3</i>      | 1.061 | 1.21111E-12 | 1.50452E-11 | Up-Regulated |
| <i>RAB25</i>      | 1.549 | 1.22381E-12 | 1.51905E-11 | Up-Regulated |
| <i>CMPK2</i>      | 1.011 | 1.22575E-12 | 1.52021E-11 | Up-Regulated |
| <i>ROBO1</i>      | 1.270 | 1.30972E-12 | 1.60982E-11 | Up-Regulated |
| <i>FGF14</i>      | 1.546 | 1.33946E-12 | 1.64236E-11 | Up-Regulated |
| <i>PELI1</i>      | 1.022 | 1.39069E-12 | 1.69417E-11 | Up-Regulated |
| <i>CLEC5A</i>     | 1.196 | 1.4365E-12  | 1.7392E-11  | Up-Regulated |
| <i>ABRACL</i>     | 1.193 | 1.45235E-12 | 1.75514E-11 | Up-Regulated |
| <i>TNFRSF11B</i>  | 1.205 | 1.73798E-12 | 2.06561E-11 | Up-Regulated |
| <i>PLAC8</i>      | 2.011 | 1.85054E-12 | 2.19077E-11 | Up-Regulated |
| <i>TMEM154</i>    | 1.049 | 1.88921E-12 | 2.22783E-11 | Up-Regulated |
| <i>CSTA</i>       | 1.561 | 1.89723E-12 | 2.23554E-11 | Up-Regulated |
| <i>ACTA2</i>      | 1.317 | 1.90984E-12 | 2.24864E-11 | Up-Regulated |
| <i>LIPG</i>       | 1.119 | 2.08247E-12 | 2.43105E-11 | Up-Regulated |
| <i>CP</i>         | 1.717 | 2.14414E-12 | 2.49032E-11 | Up-Regulated |
| <i>KIF11</i>      | 1.211 | 2.16689E-12 | 2.51021E-11 | Up-Regulated |
| <i>TPX2</i>       | 1.051 | 2.8211E-12  | 3.19452E-11 | Up-Regulated |
| <i>HILPDA</i>     | 1.031 | 3.23456E-12 | 3.60068E-11 | Up-Regulated |
| <i>COTL1</i>      | 1.188 | 3.28959E-12 | 3.65656E-11 | Up-Regulated |
| <i>PSCA</i>       | 1.891 | 3.70686E-12 | 4.06061E-11 | Up-Regulated |
| <i>ZNF521</i>     | 1.330 | 3.84208E-12 | 4.1905E-11  | Up-Regulated |
| <i>LXN</i>        | 1.223 | 3.91008E-12 | 4.25852E-11 | Up-Regulated |
| <i>ADAM12</i>     | 1.365 | 4.24067E-12 | 4.57242E-11 | Up-Regulated |
| <i>C5orf46</i>    | 1.143 | 4.46416E-12 | 4.77928E-11 | Up-Regulated |
| <i>DHRS9</i>      | 1.606 | 4.50451E-12 | 4.81906E-11 | Up-Regulated |
| <i>GBP1</i>       | 1.458 | 4.50928E-12 | 4.82075E-11 | Up-Regulated |
| <i>IFIT1</i>      | 1.170 | 4.55423E-12 | 4.86192E-11 | Up-Regulated |

|                 |       |             |             |              |
|-----------------|-------|-------------|-------------|--------------|
| <i>DUSP6</i>    | 1.077 | 4.93668E-12 | 5.22956E-11 | Up-Regulated |
| <i>ID1</i>      | 1.385 | 5.06156E-12 | 5.34311E-11 | Up-Regulated |
| <i>SLC16A1</i>  | 1.041 | 5.52143E-12 | 5.76014E-11 | Up-Regulated |
| <i>RAD51AP1</i> | 1.068 | 5.81156E-12 | 6.02122E-11 | Up-Regulated |
| <i>CCDC109B</i> | 1.240 | 6.18085E-12 | 6.33433E-11 | Up-Regulated |
| <i>EPS8L3</i>   | 1.592 | 6.29704E-12 | 6.44465E-11 | Up-Regulated |
| <i>CEMIP</i>    | 1.332 | 6.33802E-12 | 6.47782E-11 | Up-Regulated |
| <i>MUC20</i>    | 1.023 | 6.76482E-12 | 6.86757E-11 | Up-Regulated |
| <i>RRM2</i>     | 1.293 | 6.98133E-12 | 7.06836E-11 | Up-Regulated |
| <i>GBP3</i>     | 1.490 | 7.04097E-12 | 7.10875E-11 | Up-Regulated |
| <i>NUF2</i>     | 1.256 | 7.78147E-12 | 7.77426E-11 | Up-Regulated |
| <i>SLC16A3</i>  | 1.163 | 9.07766E-12 | 8.93919E-11 | Up-Regulated |
| <i>ADAM28</i>   | 1.061 | 9.40456E-12 | 9.21305E-11 | Up-Regulated |
| <i>PLS1</i>     | 1.662 | 1.00685E-11 | 9.7622E-11  | Up-Regulated |
| <i>EZR</i>      | 1.032 | 1.01101E-11 | 9.78996E-11 | Up-Regulated |
| <i>LGALS4</i>   | 2.041 | 1.05443E-11 | 1.01196E-10 | Up-Regulated |
| <i>TTK</i>      | 1.126 | 1.22197E-11 | 1.15514E-10 | Up-Regulated |
| <i>IFITM1</i>   | 1.031 | 1.29914E-11 | 1.21893E-10 | Up-Regulated |
| <i>PDZK1IP1</i> | 1.466 | 1.42537E-11 | 1.31934E-10 | Up-Regulated |
| <i>MSN</i>      | 1.045 | 1.44262E-11 | 1.33123E-10 | Up-Regulated |
| <i>CLIC3</i>    | 1.289 | 1.48269E-11 | 1.35955E-10 | Up-Regulated |
| <i>HMCN1</i>    | 1.263 | 1.62071E-11 | 1.46777E-10 | Up-Regulated |
| <i>AREG</i>     | 1.699 | 1.63141E-11 | 1.47658E-10 | Up-Regulated |
| <i>IRF7</i>     | 1.004 | 1.70301E-11 | 1.53038E-10 | Up-Regulated |
| <i>IFI16</i>    | 1.176 | 1.74167E-11 | 1.5614E-10  | Up-Regulated |
| <i>GLT8D2</i>   | 1.108 | 1.80352E-11 | 1.61111E-10 | Up-Regulated |
| <i>PPARG</i>    | 1.023 | 1.81673E-11 | 1.62196E-10 | Up-Regulated |
| <i>NREP</i>     | 1.109 | 1.99065E-11 | 1.7575E-10  | Up-Regulated |
| <i>VSIG1</i>    | 1.814 | 2.01317E-11 | 1.77634E-10 | Up-Regulated |
| <i>COL8A1</i>   | 1.204 | 2.05518E-11 | 1.80497E-10 | Up-Regulated |
| <i>KRT6B</i>    | 1.279 | 2.38659E-11 | 2.06601E-10 | Up-Regulated |
| <i>SCEL</i>     | 1.232 | 2.44237E-11 | 2.10946E-10 | Up-Regulated |
| <i>DSG2</i>     | 1.184 | 2.7692E-11  | 2.36387E-10 | Up-Regulated |
| <i>PSMB8</i>    | 1.040 | 3.25116E-11 | 2.7239E-10  | Up-Regulated |
| <i>FLRT3</i>    | 1.135 | 3.29429E-11 | 2.75851E-10 | Up-Regulated |
| <i>SFRP2</i>    | 1.815 | 3.43849E-11 | 2.86338E-10 | Up-Regulated |
| <i>PHACTR3</i>  | 1.220 | 3.58874E-11 | 2.97539E-10 | Up-Regulated |
| <i>MMP12</i>    | 2.147 | 4.71547E-11 | 3.81327E-10 | Up-Regulated |
| <i>GPR87</i>    | 1.353 | 5.02891E-11 | 4.04078E-10 | Up-Regulated |
| <i>TOX3</i>     | 1.534 | 5.56197E-11 | 4.43139E-10 | Up-Regulated |
| <i>LSR</i>      | 1.191 | 6.25717E-11 | 4.89745E-10 | Up-Regulated |
| <i>SFRP4</i>    | 1.914 | 6.42451E-11 | 5.02322E-10 | Up-Regulated |
| <i>RNF145</i>   | 1.042 | 6.76187E-11 | 5.25436E-10 | Up-Regulated |
| <i>CDKN2B</i>   | 1.077 | 6.79886E-11 | 5.27791E-10 | Up-Regulated |
| <i>PRRX1</i>    | 1.203 | 6.87445E-11 | 5.32608E-10 | Up-Regulated |
| <i>ALOX5AP</i>  | 1.383 | 7.00964E-11 | 5.41902E-10 | Up-Regulated |
| <i>ACSL5</i>    | 1.352 | 7.19655E-11 | 5.55095E-10 | Up-Regulated |
| <i>KLK7</i>     | 1.313 | 7.95897E-11 | 6.06907E-10 | Up-Regulated |
| <i>SYT13</i>    | 1.205 | 8.08083E-11 | 6.15267E-10 | Up-Regulated |
| <i>MOXD1</i>    | 1.287 | 8.32639E-11 | 6.3237E-10  | Up-Regulated |
| <i>C9orf152</i> | 1.432 | 9.24155E-11 | 6.92474E-10 | Up-Regulated |
| <i>TMEM45B</i>  | 1.321 | 9.30149E-11 | 6.9643E-10  | Up-Regulated |

|                  |       |             |             |              |
|------------------|-------|-------------|-------------|--------------|
| <i>C1R</i>       | 1.098 | 9.92438E-11 | 7.3489E-10  | Up-Regulated |
| <i>PCSK5</i>     | 1.049 | 1.07449E-10 | 7.87543E-10 | Up-Regulated |
| <i>IRF6</i>      | 1.078 | 1.2177E-10  | 8.81809E-10 | Up-Regulated |
| <i>SPP1</i>      | 1.573 | 1.29766E-10 | 9.35231E-10 | Up-Regulated |
| <i>NCF2</i>      | 1.244 | 1.44798E-10 | 1.0337E-09  | Up-Regulated |
| <i>GPNUMB</i>    | 1.310 | 1.45843E-10 | 1.03969E-09 | Up-Regulated |
| <i>MYL9</i>      | 1.245 | 1.59559E-10 | 1.12525E-09 | Up-Regulated |
| <i>KRT18</i>     | 1.122 | 1.69825E-10 | 1.19098E-09 | Up-Regulated |
| <i>TSPAN8</i>    | 1.851 | 1.70566E-10 | 1.19563E-09 | Up-Regulated |
| <i>PLCB4</i>     | 1.121 | 1.87122E-10 | 1.30081E-09 | Up-Regulated |
| <i>CLDN2</i>     | 1.346 | 1.93792E-10 | 1.34409E-09 | Up-Regulated |
| <i>LOX</i>       | 1.406 | 1.94504E-10 | 1.34655E-09 | Up-Regulated |
| <i>CTSC</i>      | 1.133 | 2.22578E-10 | 1.53039E-09 | Up-Regulated |
| <i>TREM1</i>     | 1.070 | 2.44615E-10 | 1.66449E-09 | Up-Regulated |
| <i>ARL14</i>     | 1.887 | 2.46616E-10 | 1.67358E-09 | Up-Regulated |
| <i>COL6A2</i>    | 1.104 | 2.69673E-10 | 1.81133E-09 | Up-Regulated |
| <i>TAGLN</i>     | 1.202 | 2.75256E-10 | 1.84473E-09 | Up-Regulated |
| <i>COL17A1</i>   | 1.003 | 3.72999E-10 | 2.42554E-09 | Up-Regulated |
| <i>PSMB9</i>     | 1.156 | 4.07741E-10 | 2.62211E-09 | Up-Regulated |
| <i>PCOLCE</i>    | 1.006 | 4.18709E-10 | 2.68123E-09 | Up-Regulated |
| <i>CRISPLD1</i>  | 1.301 | 4.35228E-10 | 2.77313E-09 | Up-Regulated |
| <i>MUC16</i>     | 1.409 | 4.47633E-10 | 2.84474E-09 | Up-Regulated |
| <i>GJA1</i>      | 1.110 | 4.49878E-10 | 2.8566E-09  | Up-Regulated |
| <i>MUC5B</i>     | 1.402 | 5.43885E-10 | 3.38104E-09 | Up-Regulated |
| <i>SERPINB3</i>  | 1.566 | 6.17616E-10 | 3.7941E-09  | Up-Regulated |
| <i>CFH</i>       | 1.021 | 7.14439E-10 | 4.33949E-09 | Up-Regulated |
| <i>PLEKHG1</i>   | 1.031 | 7.15791E-10 | 4.34596E-09 | Up-Regulated |
| <i>THBS1</i>     | 1.270 | 7.48846E-10 | 4.53026E-09 | Up-Regulated |
| <i>BIRC3</i>     | 1.037 | 7.49465E-10 | 4.53219E-09 | Up-Regulated |
| <i>GEM</i>       | 1.159 | 1.02838E-09 | 6.05405E-09 | Up-Regulated |
| <i>CHSY1</i>     | 1.010 | 1.0327E-09  | 6.07713E-09 | Up-Regulated |
| <i>PLA2G10</i>   | 1.041 | 1.05918E-09 | 6.22326E-09 | Up-Regulated |
| <i>GALNT3</i>    | 1.049 | 1.07759E-09 | 6.32161E-09 | Up-Regulated |
| <i>HIST1H2BC</i> | 1.024 | 1.16447E-09 | 6.77337E-09 | Up-Regulated |
| <i>AGR3</i>      | 1.959 | 1.16719E-09 | 6.78397E-09 | Up-Regulated |
| <i>PROM1</i>     | 1.636 | 1.22819E-09 | 7.10029E-09 | Up-Regulated |
| <i>SOX9</i>      | 1.133 | 1.36763E-09 | 7.82556E-09 | Up-Regulated |
| <i>SPON1</i>     | 1.158 | 1.53745E-09 | 8.70166E-09 | Up-Regulated |
| <i>CYP3A5</i>    | 1.519 | 1.69432E-09 | 9.51112E-09 | Up-Regulated |
| <i>CXCL14</i>    | 1.494 | 1.73761E-09 | 9.72161E-09 | Up-Regulated |
| <i>SNAI2</i>     | 1.096 | 1.88E-09    | 1.04179E-08 | Up-Regulated |
| <i>ELF3</i>      | 1.138 | 2.12018E-09 | 1.16084E-08 | Up-Regulated |
| <i>RASEF</i>     | 1.015 | 2.31281E-09 | 1.25764E-08 | Up-Regulated |
| <i>PBK</i>       | 1.143 | 2.62141E-09 | 1.40821E-08 | Up-Regulated |
| <i>CGN</i>       | 1.055 | 3.05972E-09 | 1.62062E-08 | Up-Regulated |
| <i>TRIM31</i>    | 1.006 | 3.3439E-09  | 1.75331E-08 | Up-Regulated |
| <i>HLA-B</i>     | 1.026 | 3.66143E-09 | 1.90591E-08 | Up-Regulated |
| <i>KLK6</i>      | 1.078 | 4.11824E-09 | 2.11887E-08 | Up-Regulated |
| <i>SULT1C2</i>   | 1.442 | 4.46631E-09 | 2.27548E-08 | Up-Regulated |
| <i>BASP1</i>     | 1.004 | 4.70389E-09 | 2.38366E-08 | Up-Regulated |
| <i>HSD17B6</i>   | 1.103 | 4.75381E-09 | 2.40654E-08 | Up-Regulated |
| <i>MUC1</i>      | 1.410 | 5.01873E-09 | 2.53385E-08 | Up-Regulated |

|                |       |             |             |              |
|----------------|-------|-------------|-------------|--------------|
| <i>PMP22</i>   | 1.033 | 5.20828E-09 | 2.62429E-08 | Up-Regulated |
| <i>ODAM</i>    | 1.256 | 5.26415E-09 | 2.65042E-08 | Up-Regulated |
| <i>MFAP5</i>   | 1.455 | 6.06717E-09 | 3.01482E-08 | Up-Regulated |
| <i>APOC1</i>   | 1.076 | 7.67199E-09 | 3.72048E-08 | Up-Regulated |
| <i>XDH</i>     | 1.088 | 8.06859E-09 | 3.89406E-08 | Up-Regulated |
| <i>SLC26A9</i> | 1.361 | 8.7117E-09  | 4.1698E-08  | Up-Regulated |
| <i>EGR2</i>    | 1.063 | 1.20023E-08 | 5.61368E-08 | Up-Regulated |
| <i>CYP4F3</i>  | 1.191 | 1.26475E-08 | 5.89124E-08 | Up-Regulated |
| <i>AKR1C3</i>  | 1.209 | 1.44312E-08 | 6.65218E-08 | Up-Regulated |
| <i>PLEKHA2</i> | 1.043 | 1.5081E-08  | 6.92441E-08 | Up-Regulated |
| <i>BCL2A1</i>  | 1.427 | 1.69932E-08 | 7.73191E-08 | Up-Regulated |
| <i>PTPN12</i>  | 1.076 | 1.85753E-08 | 8.36856E-08 | Up-Regulated |
| <i>CST6</i>    | 1.077 | 2.12425E-08 | 9.43236E-08 | Up-Regulated |
| <i>OLFM4</i>   | 2.251 | 2.14327E-08 | 9.51124E-08 | Up-Regulated |
| <i>IL7</i>     | 1.036 | 2.25141E-08 | 9.93857E-08 | Up-Regulated |
| <i>DUSP5</i>   | 1.005 | 2.32028E-08 | 1.02038E-07 | Up-Regulated |
| <i>CYP1B1</i>  | 1.448 | 2.32558E-08 | 1.02212E-07 | Up-Regulated |
| <i>MUC13</i>   | 1.198 | 3.38845E-08 | 1.44024E-07 | Up-Regulated |
| <i>HAS3</i>    | 1.032 | 3.49404E-08 | 1.4797E-07  | Up-Regulated |
| <i>SPRR3</i>   | 1.380 | 4.57081E-08 | 1.89117E-07 | Up-Regulated |
| <i>TFF2</i>    | 1.942 | 4.61486E-08 | 1.90835E-07 | Up-Regulated |
| <i>PLA2G7</i>  | 1.084 | 4.95178E-08 | 2.03045E-07 | Up-Regulated |
| <i>GIMAP2</i>  | 1.173 | 5.75441E-08 | 2.33296E-07 | Up-Regulated |
| <i>EPYC</i>    | 1.617 | 6.60456E-08 | 2.64849E-07 | Up-Regulated |
| <i>SLCO1B3</i> | 1.216 | 8.08402E-08 | 3.1926E-07  | Up-Regulated |
| <i>LY96</i>    | 1.261 | 9.14146E-08 | 3.56548E-07 | Up-Regulated |
| <i>CCL18</i>   | 1.263 | 9.68537E-08 | 3.75435E-07 | Up-Regulated |
| <i>RGS1</i>    | 1.106 | 9.72708E-08 | 3.76859E-07 | Up-Regulated |
| <i>F2RL2</i>   | 1.129 | 1.19647E-07 | 4.55033E-07 | Up-Regulated |
| <i>C3</i>      | 1.154 | 1.62999E-07 | 6.08116E-07 | Up-Regulated |
| <i>CLEC2B</i>  | 1.012 | 2.06775E-07 | 7.56854E-07 | Up-Regulated |
| <i>GDA</i>     | 1.098 | 2.25459E-07 | 8.18752E-07 | Up-Regulated |
| <i>TYROBP</i>  | 1.075 | 2.85602E-07 | 1.01462E-06 | Up-Regulated |
| <i>PTGS2</i>   | 1.334 | 2.87499E-07 | 1.02043E-06 | Up-Regulated |
| <i>STMN2</i>   | 1.103 | 3.30991E-07 | 1.16089E-06 | Up-Regulated |
| <i>LYZ</i>     | 1.804 | 4.12868E-07 | 1.4236E-06  | Up-Regulated |
| <i>C5AR1</i>   | 1.046 | 4.53852E-07 | 1.55357E-06 | Up-Regulated |
| <i>SUCNR1</i>  | 1.012 | 4.61086E-07 | 1.57654E-06 | Up-Regulated |
| <i>REG4</i>    | 2.122 | 5.30651E-07 | 1.79691E-06 | Up-Regulated |
| <i>CXCR4</i>   | 1.169 | 5.3842E-07  | 1.8224E-06  | Up-Regulated |
| <i>MMP10</i>   | 1.113 | 5.96684E-07 | 2.00078E-06 | Up-Regulated |
| <i>TFF3</i>    | 1.248 | 7.11225E-07 | 2.3549E-06  | Up-Regulated |
| <i>LY6D</i>    | 1.252 | 7.91683E-07 | 2.59812E-06 | Up-Regulated |
| <i>CHI3L1</i>  | 1.135 | 8.01269E-07 | 2.62616E-06 | Up-Regulated |
| <i>AKR1B10</i> | 1.549 | 1.40075E-06 | 4.40461E-06 | Up-Regulated |
| <i>VNN1</i>    | 1.201 | 1.41073E-06 | 4.43045E-06 | Up-Regulated |
| <i>CLRN3</i>   | 1.370 | 1.63449E-06 | 5.07097E-06 | Up-Regulated |
| <i>RNF128</i>  | 1.217 | 1.73336E-06 | 5.35135E-06 | Up-Regulated |
| <i>IGFBP1</i>  | 1.032 | 2.41993E-06 | 7.2936E-06  | Up-Regulated |
| <i>FCER1G</i>  | 1.014 | 3.6384E-06  | 1.06453E-05 | Up-Regulated |
| <i>DMBT1</i>   | 1.282 | 5.95487E-06 | 1.68233E-05 | Up-Regulated |
| <i>HSD17B2</i> | 1.153 | 7.64269E-06 | 2.11254E-05 | Up-Regulated |

|                 |        |             |             |                |
|-----------------|--------|-------------|-------------|----------------|
| <i>HPGD</i>     | 1.069  | 9.79595E-06 | 2.64956E-05 | Up-Regulated   |
| <i>EPCAM</i>    | 1.121  | 1.09428E-05 | 2.93302E-05 | Up-Regulated   |
| <i>CYP2C18</i>  | 1.003  | 2.34638E-05 | 5.91529E-05 | Up-Regulated   |
| <i>ACTG2</i>    | 1.070  | 0.000247756 | 0.000515652 | Up-Regulated   |
| <i>CDH17</i>    | 1.044  | 0.0002552   | 0.000529546 | Up-Regulated   |
| <i>FCGR3A</i>   | 1.110  | 0.000476806 | 0.00094212  | Up-Regulated   |
| <i>CRISP3</i>   | 1.191  | 0.002721655 | 0.004742021 | Up-Regulated   |
| <i>MYRIP</i>    | -1.482 | 8.40241E-22 | 1.17525E-19 | Down-Regulated |
| <i>CBFA2T3</i>  | -1.169 | 8.62691E-22 | 1.19558E-19 | Down-Regulated |
| <i>PDCD4</i>    | -1.060 | 2.46429E-19 | 1.84759E-17 | Down-Regulated |
| <i>BBIP1</i>    | -1.116 | 1.17597E-18 | 7.69011E-17 | Down-Regulated |
| <i>BTG2</i>     | -1.234 | 1.53958E-18 | 9.65015E-17 | Down-Regulated |
| <i>FAM46C</i>   | -1.363 | 2.14506E-18 | 1.28076E-16 | Down-Regulated |
| <i>ACAT1</i>    | -1.063 | 8.59424E-18 | 4.27055E-16 | Down-Regulated |
| <i>P2RX1</i>    | -1.575 | 2.33424E-17 | 1.02802E-15 | Down-Regulated |
| <i>PAIP2B</i>   | -1.700 | 3.15264E-17 | 1.34152E-15 | Down-Regulated |
| <i>FKBP11</i>   | -1.162 | 5.88817E-17 | 2.37825E-15 | Down-Regulated |
| <i>ECHDC3</i>   | -1.105 | 6.35463E-17 | 2.5395E-15  | Down-Regulated |
| <i>PTGER4</i>   | -1.088 | 2.19625E-16 | 7.50602E-15 | Down-Regulated |
| <i>KLB</i>      | -1.293 | 3.43929E-16 | 1.09377E-14 | Down-Regulated |
| <i>CA4</i>      | -1.128 | 3.88208E-16 | 1.21414E-14 | Down-Regulated |
| <i>BRSK2</i>    | -1.016 | 4.96551E-16 | 1.52148E-14 | Down-Regulated |
| <i>TPST2</i>    | -1.987 | 5.39493E-16 | 1.63646E-14 | Down-Regulated |
| <i>CCDC110</i>  | -1.689 | 9.47242E-16 | 2.67459E-14 | Down-Regulated |
| <i>GPHA2</i>    | -1.654 | 1.96692E-15 | 5.08771E-14 | Down-Regulated |
| <i>FAM129A</i>  | -1.181 | 2.00717E-15 | 5.1653E-14  | Down-Regulated |
| <i>MT1G</i>     | -1.387 | 2.55929E-15 | 6.43272E-14 | Down-Regulated |
| <i>SLC39A5</i>  | -1.462 | 3.3546E-15  | 8.08206E-14 | Down-Regulated |
| <i>GUCA1C</i>   | -1.778 | 3.71712E-15 | 8.89871E-14 | Down-Regulated |
| <i>AKAP7</i>    | -1.249 | 5.4876E-15  | 1.25981E-13 | Down-Regulated |
| <i>CTNND2</i>   | -1.372 | 7.14833E-15 | 1.6045E-13  | Down-Regulated |
| <i>MAT1A</i>    | -1.205 | 7.29331E-15 | 1.62977E-13 | Down-Regulated |
| <i>TRHDE</i>    | -1.871 | 7.37905E-15 | 1.64407E-13 | Down-Regulated |
| <i>SPX</i>      | -1.919 | 9.0344E-15  | 1.97788E-13 | Down-Regulated |
| <i>PSAT1</i>    | -1.776 | 9.54439E-15 | 2.0745E-13  | Down-Regulated |
| <i>LIFR</i>     | -1.129 | 1.14751E-14 | 2.44146E-13 | Down-Regulated |
| <i>LGALS2</i>   | -1.847 | 1.55359E-14 | 3.18866E-13 | Down-Regulated |
| <i>PM20D1</i>   | -1.984 | 1.58022E-14 | 3.23892E-13 | Down-Regulated |
| <i>CCKBR</i>    | -1.211 | 2.0991E-14  | 4.20545E-13 | Down-Regulated |
| <i>MT1F</i>     | -1.171 | 2.29597E-14 | 4.5456E-13  | Down-Regulated |
| <i>ECI2</i>     | -1.042 | 2.94533E-14 | 5.74093E-13 | Down-Regulated |
| <i>SLC16A10</i> | -1.698 | 3.23866E-14 | 6.20066E-13 | Down-Regulated |
| <i>SEL1L</i>    | -1.494 | 3.59901E-14 | 6.81287E-13 | Down-Regulated |
| <i>MT1H</i>     | -1.128 | 3.65473E-14 | 6.90967E-13 | Down-Regulated |
| <i>C5</i>       | -1.451 | 4.49308E-14 | 8.3279E-13  | Down-Regulated |
| <i>SLC1A2</i>   | -1.176 | 5.12602E-14 | 9.30693E-13 | Down-Regulated |
| <i>ALB</i>      | -2.309 | 5.18738E-14 | 9.37512E-13 | Down-Regulated |
| <i>ERO1LB</i>   | -1.780 | 5.50567E-14 | 9.8775E-13  | Down-Regulated |
| <i>GNMT</i>     | -2.376 | 7.85779E-14 | 1.34886E-12 | Down-Regulated |
| <i>EPHX2</i>    | -1.174 | 1.06802E-13 | 1.76322E-12 | Down-Regulated |
| <i>SPACA3</i>   | -1.199 | 1.17106E-13 | 1.91243E-12 | Down-Regulated |
| <i>AQP12B</i>   | -1.489 | 1.71105E-13 | 2.67846E-12 | Down-Regulated |

|                 |        |             |             |                |
|-----------------|--------|-------------|-------------|----------------|
| <i>SERPINI1</i> | -1.302 | 3.62392E-13 | 5.19876E-12 | Down-Regulated |
| <i>PDK4</i>     | -1.768 | 5.31427E-13 | 7.30626E-12 | Down-Regulated |
| <i>NUCB2</i>    | -1.276 | 5.52708E-13 | 7.57642E-12 | Down-Regulated |
| <i>GLS2</i>     | -1.115 | 5.6076E-13  | 7.67981E-12 | Down-Regulated |
| <i>BACE1</i>    | -1.465 | 5.91272E-13 | 8.03939E-12 | Down-Regulated |
| <i>AOX1</i>     | -1.697 | 9.37851E-13 | 1.20778E-11 | Down-Regulated |
| <i>NRG4</i>     | -1.215 | 9.97368E-13 | 1.27249E-11 | Down-Regulated |
| <i>KIAA1324</i> | -1.452 | 1.00066E-12 | 1.2755E-11  | Down-Regulated |
| <i>F8</i>       | -1.178 | 1.00765E-12 | 1.28127E-11 | Down-Regulated |
| <i>FAM150B</i>  | -1.863 | 1.0731E-12  | 1.35199E-11 | Down-Regulated |
| <i>TMEM52</i>   | -1.770 | 1.40472E-12 | 1.70989E-11 | Down-Regulated |
| <i>SLC30A2</i>  | -1.110 | 1.99525E-12 | 2.34372E-11 | Down-Regulated |
| <i>CTH</i>      | -1.137 | 2.07194E-12 | 2.4225E-11  | Down-Regulated |
| <i>BNIP3</i>    | -1.512 | 2.18662E-12 | 2.52918E-11 | Down-Regulated |
| <i>KCNK3</i>    | -1.176 | 4.35528E-12 | 4.68262E-11 | Down-Regulated |
| <i>TEX11</i>    | -2.158 | 6.38059E-12 | 6.5133E-11  | Down-Regulated |
| <i>RBPJL</i>    | -1.938 | 6.99278E-12 | 7.07522E-11 | Down-Regulated |
| <i>RGN</i>      | -1.284 | 7.45329E-12 | 7.47606E-11 | Down-Regulated |
| <i>SLC43A1</i>  | -1.398 | 9.76318E-12 | 9.52115E-11 | Down-Regulated |
| <i>MT1M</i>     | -1.488 | 9.81885E-12 | 9.56309E-11 | Down-Regulated |
| <i>EPHX1</i>    | -1.428 | 1.03011E-11 | 9.94046E-11 | Down-Regulated |
| <i>PRDX4</i>    | -1.117 | 1.13658E-11 | 1.07847E-10 | Down-Regulated |
| <i>AQP8</i>     | -2.859 | 1.3214E-11  | 1.2363E-10  | Down-Regulated |
| <i>EGF</i>      | -2.062 | 1.46148E-11 | 1.34371E-10 | Down-Regulated |
| <i>ZG16</i>     | -1.340 | 1.47795E-11 | 1.35637E-10 | Down-Regulated |
| <i>KIRREL2</i>  | -1.070 | 1.59822E-11 | 1.45002E-10 | Down-Regulated |
| <i>TMED6</i>    | -2.716 | 1.67971E-11 | 1.51214E-10 | Down-Regulated |
| <i>ACADL</i>    | -1.485 | 2.39616E-11 | 2.0731E-10  | Down-Regulated |
| <i>PLCE1</i>    | -1.272 | 2.8532E-11  | 2.42819E-10 | Down-Regulated |
| <i>GCAT</i>     | -1.021 | 2.99221E-11 | 2.52939E-10 | Down-Regulated |
| <i>RNF186</i>   | -1.488 | 3.21021E-11 | 2.69109E-10 | Down-Regulated |
| <i>PDIA2</i>    | -2.318 | 3.58459E-11 | 2.97358E-10 | Down-Regulated |
| <i>LMO3</i>     | -1.314 | 4.8459E-11  | 3.91037E-10 | Down-Regulated |
| <i>GAS2</i>     | -1.259 | 4.89485E-11 | 3.93956E-10 | Down-Regulated |
| <i>DPEP1</i>    | -1.261 | 9.81142E-11 | 7.28311E-10 | Down-Regulated |
| <i>ANPEP</i>    | -2.043 | 1.60954E-10 | 1.13351E-09 | Down-Regulated |
| <i>CXCL12</i>   | -1.111 | 2.186E-10   | 1.50509E-09 | Down-Regulated |
| <i>NR5A2</i>    | -1.683 | 3.26824E-10 | 2.15307E-09 | Down-Regulated |
| <i>SLC39A14</i> | -1.132 | 3.79902E-10 | 2.46406E-09 | Down-Regulated |
| <i>TSPAN7</i>   | -1.059 | 5.02373E-10 | 3.15477E-09 | Down-Regulated |
| <i>ABAT</i>     | -1.126 | 7.637E-10   | 4.60537E-09 | Down-Regulated |
| <i>ERP27</i>    | -2.723 | 1.21515E-09 | 7.04108E-09 | Down-Regulated |
| <i>REEP1</i>    | -1.065 | 1.42719E-09 | 8.13549E-09 | Down-Regulated |
| <i>KLK1</i>     | -2.217 | 1.43191E-09 | 8.15322E-09 | Down-Regulated |
| <i>RNASE1</i>   | -1.188 | 1.47475E-09 | 8.38136E-09 | Down-Regulated |
| <i>HOMER2</i>   | -1.319 | 2.964E-09   | 1.57379E-08 | Down-Regulated |
| <i>SERPINI2</i> | -3.170 | 3.17071E-09 | 1.67471E-08 | Down-Regulated |
| <i>SPAG4</i>    | -1.014 | 3.92013E-09 | 2.02522E-08 | Down-Regulated |
| <i>PAK3</i>     | -1.011 | 3.97762E-09 | 2.05211E-08 | Down-Regulated |
| <i>CTRL</i>     | -3.077 | 5.40512E-09 | 2.71488E-08 | Down-Regulated |
| <i>FGL1</i>     | -1.844 | 6.59196E-09 | 3.24465E-08 | Down-Regulated |
| <i>NRCAM</i>    | -1.102 | 6.90993E-09 | 3.38571E-08 | Down-Regulated |

|                 |        |             |             |                |
|-----------------|--------|-------------|-------------|----------------|
| <i>BEX5</i>     | -1.033 | 7.49611E-09 | 3.64455E-08 | Down-Regulated |
| <i>PDZK1</i>    | -1.118 | 1.59658E-08 | 7.28861E-08 | Down-Regulated |
| <i>GSTA1</i>    | -1.704 | 3.50039E-08 | 1.48198E-07 | Down-Regulated |
| <i>NPY1R</i>    | -1.280 | 3.85082E-08 | 1.61316E-07 | Down-Regulated |
| <i>EPB41L4B</i> | -1.091 | 3.95106E-08 | 1.65149E-07 | Down-Regulated |
| <i>DPT</i>      | -1.140 | 4.88095E-08 | 2.0063E-07  | Down-Regulated |
| <i>CELA2B</i>   | -2.910 | 7.96277E-08 | 3.15049E-07 | Down-Regulated |
| <i>IMPA2</i>    | -1.271 | 2.57283E-07 | 9.23381E-07 | Down-Regulated |
| <i>SYCN</i>     | -2.962 | 3.50146E-07 | 1.22324E-06 | Down-Regulated |
| <i>TMEM97</i>   | -1.307 | 3.63873E-07 | 1.26689E-06 | Down-Regulated |
| <i>PNLIPRP1</i> | -2.740 | 4.21575E-07 | 1.45097E-06 | Down-Regulated |
| <i>SLC38A5</i>  | -1.031 | 4.52858E-07 | 1.55051E-06 | Down-Regulated |
| <i>SYBU</i>     | -1.169 | 4.89612E-07 | 1.66691E-06 | Down-Regulated |
| <i>KCNJ16</i>   | -1.465 | 6.22018E-07 | 2.07973E-06 | Down-Regulated |
| <i>IGFBP2</i>   | -1.565 | 1.31278E-06 | 4.14785E-06 | Down-Regulated |
| <i>SLC4A4</i>   | -1.317 | 1.59884E-06 | 4.96649E-06 | Down-Regulated |
| <i>CUZD1</i>    | -2.539 | 1.83578E-06 | 5.64345E-06 | Down-Regulated |
| <i>CPA2</i>     | -2.602 | 2.01216E-06 | 6.14675E-06 | Down-Regulated |
| <i>IL22RA1</i>  | -1.023 | 2.49217E-06 | 7.49188E-06 | Down-Regulated |
| <i>GP2</i>      | -2.474 | 2.93914E-06 | 8.72788E-06 | Down-Regulated |
| <i>ADH1B</i>    | -1.178 | 3.72565E-06 | 1.089E-05   | Down-Regulated |
| <i>HBB</i>      | -1.189 | 4.08678E-06 | 1.18607E-05 | Down-Regulated |
| <i>BEX1</i>     | -1.253 | 4.10013E-06 | 1.18949E-05 | Down-Regulated |
| <i>IAPP</i>     | -1.846 | 4.65086E-06 | 1.33516E-05 | Down-Regulated |
| <i>HBA2</i>     | -1.142 | 7.00797E-06 | 1.95246E-05 | Down-Regulated |
| <i>HBA1</i>     | -1.130 | 7.81029E-06 | 2.1555E-05  | Down-Regulated |
| <i>CLPS</i>     | -2.545 | 1.06328E-05 | 2.85799E-05 | Down-Regulated |
| <i>CTRC</i>     | -2.378 | 1.46022E-05 | 3.81496E-05 | Down-Regulated |
| <i>LYVE1</i>    | -1.014 | 1.83383E-05 | 4.70719E-05 | Down-Regulated |
| <i>PRSS3</i>    | -1.765 | 1.86821E-05 | 4.78974E-05 | Down-Regulated |
| <i>CELA2A</i>   | -2.554 | 3.81136E-05 | 9.19572E-05 | Down-Regulated |
| <i>AMY1B</i>    | -1.891 | 3.8715E-05  | 9.32592E-05 | Down-Regulated |
| <i>PLA2G1B</i>  | -2.451 | 7.56929E-05 | 0.000173219 | Down-Regulated |
| <i>CELA3B</i>   | -2.147 | 0.000105385 | 0.000234975 | Down-Regulated |
| <i>AZGP1</i>    | -1.267 | 0.000116793 | 0.00025854  | Down-Regulated |
| <i>CEL</i>      | -2.232 | 0.000126807 | 0.000278625 | Down-Regulated |
| <i>FAM3B</i>    | -1.154 | 0.00016175  | 0.000348669 | Down-Regulated |
| <i>CPA1</i>     | -2.353 | 0.00017442  | 0.000373955 | Down-Regulated |
| <i>CELA3A</i>   | -2.034 | 0.000322585 | 0.000657621 | Down-Regulated |
| <i>C6</i>       | -1.022 | 0.000326766 | 0.000665335 | Down-Regulated |
| <i>CTRB2</i>    | -1.893 | 0.000660523 | 0.001273336 | Down-Regulated |
| <i>PRSS1</i>    | -1.802 | 0.000969536 | 0.001814172 | Down-Regulated |
| <i>PNLIP</i>    | -1.942 | 0.001089736 | 0.002023298 | Down-Regulated |
| <i>REG1B</i>    | -1.863 | 0.00111134  | 0.002060371 | Down-Regulated |
| <i>REG1A</i>    | -1.512 | 0.001363792 | 0.002495027 | Down-Regulated |
| <i>CPB1</i>     | -1.805 | 0.001696906 | 0.003048698 | Down-Regulated |
| <i>REG3G</i>    | -1.111 | 0.007999744 | 0.012858495 | Down-Regulated |
| <i>REG3A</i>    | -1.015 | 0.031836087 | 0.045884547 | Down-Regulated |

---

**Table S2. A list of 1791 MTGs with expression level  $\geq 0.5$  TPM in PDAC derived from HCMDB****Genes**

AAMP, ABCA2, ABCB1, ABCC5, ABCG2, ABI1, ABI2, ABL1, ABL2, ACE, ACE2, ACKR1, ACKR2, ACKR3, ACOT8, ACP5, ACTA2, ACTB, ACTL6A, ACTN4, ACTR2, ACTR3, ACVR1C, ADAM10, ADAM12, ADAM15, ADAM17, ADAM23, ADAM28, ADAM8, ADAM9, ADAMTS1, ADAMTS13, ADAMTS18, ADIPOQ, ADM, ADORA2B, ADRB2, AFAP1L1, AFAP1L2, AGER, AGO1, AGO2, AGO4, AGR2, AGR3, AGT, AGTR1, AHR, AIFM1, AJUBA, AKAP12, AKR1C2, AKR1C3, AKT1, AKT2, AKT3, ALCAM, ALDH1A1, ALDH1A3, ALDH3A1, ALDH7A1, ALDOA, ALK, ALOX5, ALPL, ALPP, ALYREF, AMACR, AMBP, AMFR, AMOT, ANGPT1, ANGPT2, ANGPTL2, ANGPTL4, ANGPTL6, ANKRD12, ANO1, ANO9, ANTXR1, ANXA1, ANXA2, ANXA2R, ANXA3, ANXA4, ANXA7, APAF1, APBA2, APC, APEX1, API5, APMAP, APOBEC3G, APOM, AQP1, AQP3, AQP5, AQP8, AR, ARF6, ARG1, ARHGAP35, ARHGAP5, ARHGDIA, ARHGDIB, ARHGEF1, ARHGEF2, ARHGEF39, ARID1A, ARID4A, ARID4B, ARL2BP, ARL6IP5, ARMC8, ARNT, ARNTL, ARRB1, ARTN, ASAP1, ASCL2, ASPN, ASS1, ATAD2, ATF3, ATF4, ATG10, ATM, ATP11A, ATP2A3, ATP5B, ATP6V1C1, ATP1F1, AURKA, AURKB, AUTS2, AXIN2, AXL, B2M, B3GAT1, B3GNT3, B3GNT7, B3GNT8, B4GALT1, B4GALT3, BAD, BAG1, BAG2, BAG3, BAIAP2, BAK1, BAP1, BAX, BAZ2A, BBC3, BCAM, BCAR1, BCAT1, BCL2, BCL2L1, BCL2L11, BCL2L12, BCL2L2, BCL9, BDKRB2, BDNF, BECN1, BGN, BIN1, BIRC2, BIRC3, BIRC5, BIRC7, BMI1, BMP1, BMP2, BMP4, BMP5, BMP6, BMP7, BNIP3, BRAF, BRCA1, BRCA2, BRD7, BRMS1, BRS3, BSG, BST2, BTG1, BVES, C14orf166, C1QA, C1QBP, C6orf106, CA2, CA9, CACUL1, CACYBP, CADM1, CALCA, CALR, CALU, CAMP, CANX, CAP1, CAPG, CAPNS1, CARD10, CARD9, CASP10, CASP3, CASP8, CASP9, CASS4, CAT, CAV1, CBL, CBLB, CBR1, CBR3, CBX4, CBX5, CBX7, CBX8, CCAR2, CCDC88A, CCDC88C, CCL14, CCL18, CCL19, CCL2, CCL21, CCL22, CCL3, CCL5, CCL7, CCL8, CCNA2, CCNB1, CCNB2, CCND1, CCND2, CCNG1, CCNG2, CCR1, CCR4, CCR5, CCR7, CCR9, CD109, CD14, CD151, CD164, CD200, CD22, CD24, CD274, CD276, CD34, CD4, CD40, CD44, CD47, CD55, CD63, CD74, CD80, CD81, CD82, CD9, CDC42, CDC73, CDCA8, CDCP1, CDH1, CDH11, CDH12, CDH13, CDH17, CDH2, CDH3, CDK1, CDK4, CDK5RAP3, CDK8, CDKN1A, CDKN1B, CDKN2A, CDX2, CEACAM1, CEACAM3, CEACAM5, CEACAM6, CEBPA, CEBPB, CEMIP, CENPW, CERS2, CERS6, CFL1, CFTR, CHAF1B, CHD1L, CHEK1, CHEK2, CHFR, CHGA, CHI3L1, CHRM3, CHRNA7, CHUK, CITED1, CITED2, CKS1B, CLCA1, CLCA2, CLCN3, CLDN1, CLDN11, CLDN16, CLDN18, CLDN3, CLDN4, CLDN5, CLDN7, CLEC4G, CLIC1, CLIC3, CLIC4, CLIP1, CLOCK, CLU, CMTM3, CNBP, CNR1, CNTN1, COL18A1, COL1A1, COL3A1, COL4A6, COPS3, CORO1C, CPE, CPEB2, CPEB4, CPNE3, CR1, CRABP2, CREB1, CREB3, CREB5, CREM, CRIM1, CRK, CRKL, CRMP1, CRP, CRTC2, CRYAB, CSE1L, CSF1, CSNK1A1, CSNK2A1, CSNK2B, CSPG4, CST3, CST6, CSTA, CTGF, CTHRC1, CTLA4, CTNNA1, CTNNAL1, CTNNB1, CTNND1, CTNND2, CTSB, CTSD, CTSH, CTSK, CTSL, CTSS, CTSZ, CTTN, CUL1, CUX1, CX3CR1, CXADR, CXCL1, CXCL10, CXCL12, CXCL14, CXCL2, CXCL3, CXCL6, CXCL8, CXCR1, CXCR2, CXCR3, CXCR4, CXCR6, CXXC4, CYB5R3, CYCS, CYLD, CYP1B1, CYP2J2, CYP3A4, CYP3A5, CYR61, DAB2, DAB2IP, DACH1, DACT2, DAG1, DAPK1, DDA1, DDB2, DDIT3, DDR1, DDR2, DEK, DEPDC1B, DEPTOR, DHFR, DIABLO, DIAPH1, DICER1, DIRAS1, DIRAS3, DIXDC1, DKK1, DKK3, DKK4, DLC1, DLEC1, DLL1, DLL4, DNAJA3, DNAJB4, DNAJB6, DNM2, DNMT3A, DNMT3B, DOCK1, DOCK4, DPEP1, DPP4, DPYD, DPYSL3, DRG1, DROSHA, DSC3, DSG3, DUSP1, DUSP6, DVL2, E2F1, E2F3, EBAG9, ECE1, ECE2, ECM1, ECT2, EDN1, EDNRA, EDNRB, EFEMP1, EFN1, EFN2, EGF, EGFL7, EGFR, EGLN3, EGR1, EGR3, EHD2, EHMT2, EIF1AX, EIF3I, EIF4B, EIF4E, EIF4EBP1, EIF5A2, EIF6, ELAVL1, ELAVL4, ELF1, ELF5, ELK3, ELMO1, EMP1, EMP3, ENAH, ENG, ENO1, ENO2, ENPP1, ENPP2, ENTPD1, EP300, EPAS1, EPB41L3, EPC1, EPCAM,



---

EPHA1, EPHA10, EPHA2, EPHA4, EPHA7, EPHB1, EPHB2, EPHB3, EPHB4, EPOR, EPS8, EPSTI1, ERAP1, ERBB2, ERBB3, ERCC1, EREG, ERG, ERP29, ESAM, ESM1, ESR1, ESRP1, ETS1, ETS2, ETV1, ETV4, ETV7, EVI5, EVL, EYA2, EZH2, EZR, F11R, F2R, F2RL1, F3, F7, FABP1, FABP3, FABP5, FADD, FAIM2, FAM120A, FAM134A, FAM3B, FANCD2, FAP, FAS, FASLG, FASN, FBLN5, FBN1, FBN2, FBXO11, FBXW7, FCGRT, FDFT1, FER, FERMT1, FERMT2, FERMT3, FGF1, FGF19, FGF2, FGFBP1, FGFR1, FGFR2, FGFR3, FGFR4, FGL2, FHIT, FHL2, FILIP1, FKBP5, FLI1, FLNA, FLOT1, FLOT2, FLT1, FLT4, FMNL2, FMNL3, FN1, FNDC3B, FOLH1, FOS, FOSB, FOSL1, FOXA2, FOXC1, FOXC2, FOXD3, FOXF2, FOXJ1, FOXJ2, FOXK1, FOXL1, FOXM1, FOXN3, FOXO1, FOXO3, FOXO4, FOXP3, FOXQ1, FPR2, FRAT1, FSCN1, FSCN2, FST, FSTL1, FUBP1, FURIN, FUS, FXR1, FXYD3, FXYD5, FYN, FZD2, FZD7, G3BP1, G3BP2, G6PD, GAB1, GAB2, GADD45A, GAL3ST2, GALNT3, GAS1, GAS6, GATA3, GATA4, GATA6, GBP2, GCNT1, GCNT2, GDF15, GDNF, GEMIN2, GFRA1, GGCT, GHITM, GHR, GHRL, GIT1, GJA1, GJB1, GJB2, GKN1, GKN2, GLG1, GLI1, GLI2, GLI3, GLRX3, GMNN, GNA12, GNA13, GNAI1, GNB3, GNPTG, GOLPH3, GPC3, GPC5, GPER1, GPI, GPNMB, GPR4, GPR68, GPR87, GPX1, GPX3, GRB2, GRB7, GRINA, GRM4, GRN, GSC, GSDMB, GSK3B, GSN, GSTM1, GSTM3, GSTP1, GUSB, GZMB, H2AFX, HAMP, HAS1, HAX1, HBEGF, HDAC1, HDAC10, HDAC2, HDAC4, HDGF, HES1, HEY1, HGF, HIC1, HIF1A, HIP1, HK1, HK2, HMGA1, HMGA2, HMGB1, HMMR, HMOX1, HNF1A, HNF4A, HNRNPA1, HNRNPAB, HNRNPD, HNRNPK, HNRNPM, HOMER1, HOPX, HOXA1, HOXA5, HOXA9, HOXB13, HOXB5, HOXB7, HOXB9, HOXC8, HOXD9, HP, HPN, HPSE, HRAS, HRC, HSF1, HSP90AA1, HSP90AB1, HSP90B1, HSPA4, HSPA5, HSPA9, HSPB1, HSPB2, HSPD1, HTATIP2, HTRA1, HTRA2, HTRA3, HTT, HVCN1, HYAL1, HYAL3, IBSP, ICAM1, ID1, ID2, ID3, IDH1, IDO1, IFIT2, IFITM1, IFNAR2, IGF1, IGF1R, IGF2BP1, IGF2BP3, IGFBP1, IGFBP2, IGFBP3, IGFBP4, IGFBP5, IGFBP7, IGSF8, IHH, IKBKB, IKBKE, IL10, IL11, IL12A, IL13RA1, IL13RA2, IL17RA, IL17RB, IL18, IL1A, IL1B, IL1RL1, IL23A, IL24, IL2RG, IL32, IL34, IL4R, IL6, IL7, IL7R, ILK, IMP3, ING1, ING4, ING5, INHBA, INPP4B, INPPL1, INS, IQGAP1, IQSEC1, IRAK1, IRF7, IRS1, IRS2, IRX1, IRX2, ISG15, ITGA2, ITGA3, ITGA4, ITGA5, ITGA6, ITGAM, ITGAV, ITGB1, ITGB2, ITGB3, ITGB3BP, ITGB4, ITGB5, ITGB6, ITGB8, ITIH1, ITIH3, IVNS1ABP, JAG1, JAG2, JAK1, JAK2, JAM3, JDP2, JUN, JUP, KARS, KAT5, KATNA1, KCNMA1, KCNN4, KDM1A, KDM3A, KDM4B, KDM4C, KDM5A, KDM6B, KDR, KEAP1, KHDRBS1, KIAA0100, KIAA1524, KIF14, KIF2C, KIF3C, KISS1, KISS1R, KIT, KITLG, KL, KLF2, KLF4, KLF5, KLF6, KLF8, KLK13, KLK3, KLK4, KLK6, KLK7, KLK8, KRAS, KRT14, KRT17, KRT18, KRT19, KRT20, KRT5, KRT6A, KRT7, KRT8, L1CAM, LAMA5, LAMB3, LAMC2, LAMP3, LAMTOR1, LAP3, LAPTM4B, LARP7, LASP1, LAT, LATS2, LCN2, LCP1, LDHA, LECT1, LEF1, LEP, LEPR, LGALS1, LGALS2, LGALS3, LGALS3BP, LGALS8, LGALS9, LGI4, LGR4, LGR5, LIF, LIFR, LIMA1, LIMK1, LIMK2, LIMS1, LIPH, LLGL1, LLGL2, LMCD1, LMNA, LOX, LOXL2, LOXL4, LPAR1, LPAR2, LRG1, LRP5, LRP6, LRRRC26, LRRFIP1, LTB4R2, LTBP1, LYN, LYNX1, LYPD3, LYVE1, LZTS1, MACC1, MACROD1, MAEL, MAF, MAGEA3, MAGED1, MAL, MAML1, MAOA, MAP1LC3A, MAP1LC3B, MAP2, MAP2K4, MAP2K7, MAP3K1, MAP3K11, MAP3K7, MAP7D3, MAPK1, MAPK12, MAPK13, MAPK14, MAPK3, MAPK7, MAPK8, MAPK9, MAPKAP1, MARCKS, MARK2, MASP2, MBD1, MBD2, MBNL1, MCAM, MCL1, MCTS1, MDC1, MDK, MDM2, MECP2, MED19, MED23, MET, METAP2, MFAP3L, MGAT3, MGAT5, MGEA5, MGMT, MIA, MIA3, MICA, MIEN1, MIF, MITF, MKI67, MKL1, MLF2, MLH1, MME, MMP1, MMP10, MMP11, MMP12, MMP13, MMP14, MMP15, MMP16, MMP17, MMP2, MMP28, MMP3, MMP7, MMP9, MMS19, MOB1A, MPP3, MPZL1, MRC2, MRPL44, MSH2, MSI1, MSLN, MSN, MSR1, MSRA, MST1, MST1R, MTA1, MTA2, MTA3, MTAP, MTBP, MTDH, MTHFR, MTNR1A, MTOR, MTSS1, MUC1, MUC13, MUC16, MUC20, MUC4, MUC5AC, MUC6, MUCL1, MX1, MXD1, MYB, MYC, MYCN, MYD88, MYH9, MYO10, MYO1B, MYO5A, MYO9B, MZF1, NAA10, NAB2, NAMPT, NAT1, NBN, NCL, NCOA2, NCOA3, NCOA4,

---

---

NCOR2, NCR3LG1, NDC80, NDRG1, NDRG2, NDUFA13, NDUFB9, NEDD4, NEDD4L, NEDD9, NES, NET1, NEU1, NF2, NFATC1, NFATC2, NFE2L2, NFIB, NFKB1, NFKB2, NGF, NGFR, NISCH, NLRP1, NLRP3, NME1, NME2, NME3, NME9, NMU, NOB1, NOD2, NOG, NOL3, NOS2, NOS3, NOTCH1, NOTCH3, NOX1, NPEPPS, NPPA, NR1H4, NR2C2, NR2F2, NR4A1, NR4A2, NRAS, NRF1, NRG1, NRP1, NRP2, NT5E, NTN1, NTRK1, NTRK2, NUA1, NUCB2, NUCKS1, NUDCD1, NUPR1, OCIAD1, OCLN, ODAM, ODC1, OGG1, OGT, OLR1, ONECUT1, OPCML, ORAI1, ORM2, OSBPL5, OSM, OTUB1, P2RY2, P4HA2, PAG1, PAK1, PAK4, PALLD, PAQR3, PARD3, PARD6A, PARK7, PARP1, PARVA, PARVB, PAX5, PAX8, PBX3, PBXIP1, PCBP1, PCDH10, PCDH9, PCMT1, PCNA, PCSK9, PDCD1, PDCD4, PDCD6IP, PDGFB, PDGFRA, PDGFRB, PDIA3, PDLIM1, PDLIM7, PDPN, PEAK1, PEBP1, PEBP4, PECAM1, PELP1, PER1, PFN1, PGF, PGK1, PGR, PHB, PIAS1, PIEZO1, PIGR, PIK3CA, PIK3CG, PIK3R1, PIM1, PIN1, PIP, PIP4K2A, PITPNM1, PITPNM3, PITX1, PIWIL1, PIWIL2, PIWIL4, PKD1, PKM, PKP3, PLA1A, PLA2G10, PLA2G16, PLA2G2A, PLA2G3, PLAGL1, PLAU, PLAU, PLCE1, PLD1, PLD2, PLEC, PLK1, PLK4, PLOD2, PLS3, PLXDC1, PLXNB1, PLXND1, PMEL, PML, PMP22, PODXL, POMC, POSTN, POU5F1, PPA1, PPAR, PPARG, PPARGC1A, PPIA, PPM1D, PPP1R13L, PPP1R9B, PPP2CA, PPP3CA, PPT1, PRAF2, PRAME, PRDM2, PRDX1, PRDX2, PRDX4, PRDX6, PREP, PREX1, PREX2, PRKAA1, PRKCA, PRKCE, PRKCG, PRKCI, PRKCZ, PRKD1, PRKD2, PRKD3, PRKDC, PRLR, PRMT1, PRMT7, PRNP, PROC, PROM1, PROX1, PRRX1, PRSS3, PRSS8, PSAP, PSCA, PSMA7, PSMD10, PSME2, PSME3, PTAFR, PTCH1, PTEN, PTGER1, PTGER3, PTGES, PTGIS, PTGS1, PTGS2, PTH1R, PTHLH, PTK2, PTK2B, PTK6, PTK7, PTP4A1, PTP4A2, PTP4A3, PTPN1, PTPN11, PTPN13, PTPN2, PTPN3, PTPN6, PTPRD, PTPRR, PTTG1, PTX3, PXN, RAB11FIP4, RAB1A, RAB1B, RAB22A, RAB23, RAB25, RAB27B, RAB37, RAB3D, RAB40B, RAB5A, RABEP1, RABGEF1, RAC1, RAC2, RAC3, RACGAP1, RAD21, RAD51, RADIL, RAF1, RALA, RALB, RALBP1, RALGAPA2, RALGDS, RAN, RAP1A, RAP1B, RAPGEF3, RARB, RARG, RARRES3, RASA1, RASAL2, RASSF1, RASSF10, RASSF2, RASSF5, RB1, RBBP8, RBM5, RCN1, RDX, RECK, RECQL, REG4, RELA, RELB, RERG, RET, RETN, RETNLB, RFW2, RGS16, RGS2, RGS5, RHOA, RHOB, RHOC, RICTOR, RIOK3, RLN2, RNASE1, RNF111, RNF180, RNF41, RNH1, ROBO1, ROCK1, ROCK2, ROR1, RPL39, RPS27, RPS6KA3, RPS6KB1, RPSA, RRAS2, RRM1, RRP1B, RSF1, RTKN, RUNX2, RUNX3, RXRA, S100A10, S100A11, S100A14, S100A2, S100A4, S100A6, S100A7, S100A8, S100A9, S100B, S100P, S1PR1, SAA1, SAE1, SALL4, SAMD9, SATB1, SATB2, SCARA3, SCARB2, SCGB2A1, SCGB2A2, SCGB3A1, SCGN, SCN1B, SCRIN1, SCUBE2, SDC1, SDC2, SDC4, SDCBP, SDHB, SDPR, SELE, SELP, SELPLG, SEMA3E, SEMA3F, SEMA4B, SEMA4C, SEMA4D, SEMA5A, SEMA6B, SENP1, SENP3, SERBP1, SERPINA5, SERPINB3, SERPINB4, SERPINB5, SERPIND1, SERPINE1, SERPINE2, SERPINF1, SESN2, SET, SETD1A, SETD2, SETDB1, SFN, SFRP1, SFRP2, SFTPA1, SGK1, SH2B1, SHC1, SHH, SIAH1, SIK1, SIRT1, SIRT6, SIRT7, SIX1, SKIL, SKP2, SLC16A4, SLC1A5, SLC2A1, SLC2A3, SLC39A4, SLC39A6, SLC3A2, SLC9A1, SLIT2, SLITRK3, SLPI, SMAD1, SMAD2, SMAD3, SMAD4, SMAD6, SMAD7, SMARCA4, SMARCB1, SMARCC1, SMARCE1, SMO, SMPD3, SMURF1, SMURF2, SMYD3, SNAI1, SNAI2, SNCG, SND1, SOCS1, SOCS3, SOD2, SOD3, SOX12, SOX17, SOX2, SOX4, SOX8, SOX9, SP1, SP3, SPAG9, SPARC, SPDEF, SPHK1, SPINK1, SPINT1, SPINT2, SPN, SPOCK1, SPON2, SPP1, SQLE, SRA1, SRC, SRF, SRGN, SRPK1, SRR, SRXN1, SS18, SSR4, SSTR2, SSX2IP, ST14, ST3GAL1, ST6GAL1, ST6GALNAC2, ST8SIA1, STARD13, STAT1, STAT3, STAT5A, STAT5B, STAT6, STC1, STC2, STIM1, STK11, STMN1, STOML2, STUB1, STX2, STX6, STYK1, SULF2, SUV39H1, SUZ12, SYK, SYNJ2, SYNPO2, SYTL1, SYTL2, TAC1, TACC3, TACR1, TACSTD2, TAGLN, TAP1, TAZ, TBK1, TBL1XR1, TBX2, TBX21, TBX3, TBXAS1, TCF12, TCF3, TCF7L2, TEK, TES, TET1, TET2, TFAP4, TFCP2, TFF1, TFF2, TFF3, TFPI2, TG, TGFA, TGFB1, TGFB2, TGFB1, TGFB2, TGFB1, TGFB2,

---

---

TGFBR3, TGIF2, TGM2, THBS1, THBS2, THPO, THRB, THY1, TIAM1, TIMP1, TIMP2, TIMP3, TJP1, TLR2, TLR3, TLR4, TM4SF1, TM4SF5, TMBIM1, TMBIM4, TMBIM6, TMEM100, TMEM88, TMEM8B, TMEM97, TMPRSS2, TMPRSS4, TMSB15A, TMSB4X, TNC, TNF, TNFAIP1, TNFAIP2, TNFAIP3, TNFAIP8, TNFAIP8L2, TNFRSF10A, TNFRSF10B, TNFRSF11A, TNFRSF11B, TNFRSF12A, TNFRSF1A, TNFRSF1B, TNFRSF25, TNFRSF4, TNFSF11, TNFSF12, TNFSF13, TNK2, TNN, TNS1, TNS2, TNS3, TNS4, TOP2A, TP53, TP63, TP73, TPBG, TPD52, TPM1, TPM2, TPM3, TPP1, TPST1, TPX2, TRAF4, TRAF6, TRAP1, TRIM16, TRIM25, TRIM28, TRIM29, TRIM32, TRIM33, TRIP10, TRIT1, TRPC1, TRPM7, TRPS1, TRPV6, TSC2, TSG101, TSLP, TSPAN12, TSPAN2, TSPAN7, TSPAN8, TTC36, TTC9, TTF2, TUBB4B, TUSC3, TWIST1, TWIST2, TXN, TXNDC12, TXNIP, TYK2, TYMP, TYMS, TYRP1, UBA2, UBD, UBE2C, UBE2I, UBE2N, UBE2V1, UCHL1, UCP2, UGCG, UGT2B15, UGT2B17, UHRF1, UIMC1, ULK1, UMPS, UNC45A, UNC5B, UPF1, UPP1, USP14, USP22, USP28, UTRN, VANGL1, VASH1, VASP, VAV2, VAV3, VCAM1, VCAN, VCP, VDR, VEGFA, VEGFB, VEGFC, VEZT, VIM, VLDLR, VMP1, VSNL1, VTCN1, VWCE, WASF1, WASF2, WASF3, WASL, WFDC2, WIF1, WISP1, WISP2, WISP3, WLS, WNT11, WNT2B, WNT5A, WNT7B, WRAP53, WSB1, WT1, WWOX, WWP1, WWTR1, XCR1, XIAP, XRCC1, XRCC2, XRCC5, YAP1, YBX1, YES1, YWHAE, YWHAG, YWHAZ, YY1, ZBTB16, ZBTB20, ZBTB33, ZBTB7A, ZDHHC2, ZEB1, ZEB2, ZFH3, ZFP36, ZFX, ZHX2, ZNF148, ZNF217, ZNF350, ZNF382, ZNF592, ZNF703.

---

Table S3. 246 DE-MTGs identified in PDAC

| <b>Gene</b>     | <b>logFC</b> | <b>P Value</b> | <b>FDR</b>  | <b>regulated</b> |
|-----------------|--------------|----------------|-------------|------------------|
| <i>LAMC2</i>    | 2.650        | 1.51583E-33    | 2.28981E-29 | Up-Regulated     |
| <i>S100P</i>    | 4.297        | 3.48635E-33    | 2.63324E-29 | Up-Regulated     |
| <i>KRT19</i>    | 3.527        | 7.83878E-33    | 3.94709E-29 | Up-Regulated     |
| <i>ITGA2</i>    | 2.048        | 2.51479E-32    | 7.59769E-29 | Up-Regulated     |
| <i>SLPI</i>     | 2.634        | 1.12073E-31    | 2.82161E-28 | Up-Regulated     |
| <i>ANXA2</i>    | 1.298        | 2.99506E-31    | 6.46334E-28 | Up-Regulated     |
| <i>INHBA</i>    | 3.142        | 2.69629E-30    | 5.09126E-27 | Up-Regulated     |
| <i>GJB2</i>     | 3.389        | 3.20932E-30    | 5.38667E-27 | Up-Regulated     |
| <i>FN1</i>      | 2.787        | 1.02154E-29    | 1.54314E-26 | Up-Regulated     |
| <i>KRT7</i>     | 2.681        | 2.05178E-29    | 2.58285E-26 | Up-Regulated     |
| <i>SFN</i>      | 2.944        | 6.54358E-29    | 7.06052E-26 | Up-Regulated     |
| <i>LAMB3</i>    | 2.223        | 3.55549E-28    | 2.98384E-25 | Up-Regulated     |
| <i>ANO1</i>     | 1.826        | 6.90453E-28    | 5.21499E-25 | Up-Regulated     |
| <i>SERPINB5</i> | 2.598        | 1.64594E-27    | 1.18398E-24 | Up-Regulated     |
| <i>S100A11</i>  | 1.839        | 1.89543E-27    | 1.30147E-24 | Up-Regulated     |
| <i>IGFBP3</i>   | 2.459        | 2.09147E-27    | 1.37364E-24 | Up-Regulated     |
| <i>S100A10</i>  | 1.439        | 3.54929E-27    | 2.23398E-24 | Up-Regulated     |
| <i>TMPRSS4</i>  | 2.301        | 7.61661E-27    | 4.10916E-24 | Up-Regulated     |
| <i>CTHRC1</i>   | 3.221        | 3.35714E-26    | 1.44894E-23 | Up-Regulated     |
| <i>S100A6</i>   | 2.392        | 3.48733E-26    | 1.46332E-23 | Up-Regulated     |
| <i>CAPG</i>     | 1.813        | 7.40686E-26    | 3.024E-23   | Up-Regulated     |
| <i>SDC1</i>     | 1.422        | 8.08522E-26    | 3.13167E-23 | Up-Regulated     |
| <i>HOXB7</i>    | 1.497        | 2.20995E-25    | 7.76362E-23 | Up-Regulated     |
| <i>TPBG</i>     | 1.330        | 2.32188E-25    | 7.97144E-23 | Up-Regulated     |
| <i>FHL2</i>     | 1.802        | 3.28089E-25    | 1.07741E-22 | Up-Regulated     |
| <i>THBS2</i>    | 2.681        | 2.2053E-24     | 5.94881E-22 | Up-Regulated     |
| <i>SOX4</i>     | 1.139        | 2.48598E-24    | 6.5374E-22  | Up-Regulated     |
| <i>POSTN</i>    | 3.309        | 3.04284E-24    | 7.53528E-22 | Up-Regulated     |
| <i>NET1</i>     | 1.170        | 4.25854E-24    | 1.0211E-21  | Up-Regulated     |
| <i>MSLN</i>     | 2.889        | 4.34982E-24    | 1.02669E-21 | Up-Regulated     |
| <i>FXYD3</i>    | 1.948        | 4.89832E-24    | 1.12112E-21 | Up-Regulated     |
| <i>DKK1</i>     | 2.605        | 6.63757E-24    | 1.49652E-21 | Up-Regulated     |
| <i>CEACAM6</i>  | 3.786        | 9.25046E-24    | 1.96813E-21 | Up-Regulated     |
| <i>CD9</i>      | 1.272        | 1.16825E-23    | 2.44678E-21 | Up-Regulated     |
| <i>LGALS3</i>   | 1.412        | 1.35063E-23    | 2.75712E-21 | Up-Regulated     |
| <i>ITGA3</i>    | 1.502        | 1.63418E-23    | 3.29145E-21 | Up-Regulated     |
| <i>PKM</i>      | 1.358        | 7.1455E-23     | 1.31634E-20 | Up-Regulated     |
| <i>FERMT1</i>   | 1.786        | 7.94031E-23    | 1.44514E-20 | Up-Regulated     |
| <i>TIMP1</i>    | 2.013        | 1.02281E-22    | 1.83936E-20 | Up-Regulated     |
| <i>CEACAM5</i>  | 4.088        | 1.13206E-22    | 2.01187E-20 | Up-Regulated     |
| <i>NMU</i>      | 2.293        | 1.53317E-22    | 2.54506E-20 | Up-Regulated     |
| <i>CDH3</i>     | 1.672        | 1.782E-22      | 2.89738E-20 | Up-Regulated     |
| <i>KRT17</i>    | 2.403        | 1.78377E-22    | 2.89738E-20 | Up-Regulated     |
| <i>CD55</i>     | 1.902        | 1.90417E-22    | 3.06005E-20 | Up-Regulated     |
| <i>HK2</i>      | 1.817        | 2.12681E-22    | 3.38186E-20 | Up-Regulated     |
| <i>VCAN</i>     | 2.583        | 2.62213E-22    | 4.12603E-20 | Up-Regulated     |
| <i>ISG15</i>    | 1.789        | 4.9303E-22     | 7.30167E-20 | Up-Regulated     |
| <i>LCN2</i>     | 3.038        | 5.72284E-22    | 8.31242E-20 | Up-Regulated     |
| <i>SDC4</i>     | 1.179        | 6.95445E-22    | 9.81813E-20 | Up-Regulated     |
| <i>LGALS3BP</i> | 1.471        | 9.72522E-22    | 1.33554E-19 | Up-Regulated     |

|                |       |             |             |              |
|----------------|-------|-------------|-------------|--------------|
| <i>SAMD9</i>   | 1.562 | 9.8573E-22  | 1.34148E-19 | Up-Regulated |
| <i>KCNN4</i>   | 1.514 | 1.09322E-21 | 1.47448E-19 | Up-Regulated |
| <i>SLC2A1</i>  | 1.558 | 1.6045E-21  | 2.0198E-19  | Up-Regulated |
| <i>EFNB2</i>   | 1.717 | 2.37555E-21 | 2.91748E-19 | Up-Regulated |
| <i>SMYD3</i>   | 1.028 | 2.67288E-21 | 3.20448E-19 | Up-Regulated |
| <i>ECT2</i>    | 1.224 | 4.30037E-21 | 4.99703E-19 | Up-Regulated |
| <i>AHR</i>     | 1.388 | 5.47428E-21 | 6.18614E-19 | Up-Regulated |
| <i>TM4SF1</i>  | 1.513 | 5.81239E-21 | 6.45603E-19 | Up-Regulated |
| <i>SYTL2</i>   | 1.578 | 5.98494E-21 | 6.59917E-19 | Up-Regulated |
| <i>COL3A1</i>  | 2.181 | 6.32843E-21 | 6.92733E-19 | Up-Regulated |
| <i>FZD2</i>    | 1.138 | 9.1288E-21  | 9.71124E-19 | Up-Regulated |
| <i>SULF2</i>   | 1.863 | 2.44863E-20 | 2.40188E-18 | Up-Regulated |
| <i>MST1R</i>   | 1.477 | 2.56504E-20 | 2.48382E-18 | Up-Regulated |
| <i>SPON2</i>   | 1.328 | 2.7176E-20  | 2.61478E-18 | Up-Regulated |
| <i>JUP</i>     | 1.270 | 3.7489E-20  | 3.56169E-18 | Up-Regulated |
| <i>AGR2</i>    | 2.754 | 3.91238E-20 | 3.67083E-18 | Up-Regulated |
| <i>INPP4B</i>  | 1.572 | 4.11524E-20 | 3.81379E-18 | Up-Regulated |
| <i>LTBP1</i>   | 1.244 | 4.74966E-20 | 4.34839E-18 | Up-Regulated |
| <i>PLAUR</i>   | 1.502 | 6.62283E-20 | 5.81654E-18 | Up-Regulated |
| <i>KLF5</i>    | 2.085 | 7.29281E-20 | 6.33133E-18 | Up-Regulated |
| <i>CAP1</i>    | 1.128 | 7.81989E-20 | 6.75013E-18 | Up-Regulated |
| <i>DKK3</i>    | 1.346 | 1.94999E-19 | 1.52625E-17 | Up-Regulated |
| <i>SPARC</i>   | 1.835 | 2.12078E-19 | 1.62573E-17 | Up-Regulated |
| <i>ANXA3</i>   | 1.651 | 2.34191E-19 | 1.76884E-17 | Up-Regulated |
| <i>FXYD5</i>   | 1.535 | 2.47063E-19 | 1.84759E-17 | Up-Regulated |
| <i>PLAU</i>    | 1.695 | 2.75283E-19 | 2.03844E-17 | Up-Regulated |
| <i>FOXQ1</i>   | 2.130 | 3.01042E-19 | 2.18632E-17 | Up-Regulated |
| <i>PRKCI</i>   | 1.072 | 4.09814E-19 | 2.87937E-17 | Up-Regulated |
| <i>SPOCK1</i>  | 1.585 | 4.15053E-19 | 2.90268E-17 | Up-Regulated |
| <i>RACGAP1</i> | 1.419 | 4.56045E-19 | 3.1601E-17  | Up-Regulated |
| <i>ENO2</i>    | 1.475 | 6.4911E-19  | 4.43686E-17 | Up-Regulated |
| <i>FAP</i>     | 2.128 | 7.56228E-19 | 5.09981E-17 | Up-Regulated |
| <i>STYK1</i>   | 1.455 | 1.03591E-18 | 6.80369E-17 | Up-Regulated |
| <i>PALLD</i>   | 1.644 | 1.92738E-18 | 1.18354E-16 | Up-Regulated |
| <i>MMP28</i>   | 1.264 | 1.97516E-18 | 1.20262E-16 | Up-Regulated |
| <i>S100A4</i>  | 1.891 | 2.18637E-18 | 1.30029E-16 | Up-Regulated |
| <i>ECM1</i>    | 1.293 | 4.17247E-18 | 2.30877E-16 | Up-Regulated |
| <i>LIPH</i>    | 1.393 | 4.28271E-18 | 2.36112E-16 | Up-Regulated |
| <i>NUAK1</i>   | 1.308 | 4.40085E-18 | 2.39997E-16 | Up-Regulated |
| <i>LIMS1</i>   | 1.056 | 4.94723E-18 | 2.6501E-16  | Up-Regulated |
| <i>EPS8</i>    | 1.214 | 5.0295E-18  | 2.67995E-16 | Up-Regulated |
| <i>WISP1</i>   | 1.376 | 6.3148E-18  | 3.21183E-16 | Up-Regulated |
| <i>SLC16A4</i> | 1.625 | 7.102E-18   | 3.58806E-16 | Up-Regulated |
| <i>WNT5A</i>   | 1.291 | 1.23628E-17 | 5.83603E-16 | Up-Regulated |
| <i>TGFBI</i>   | 1.478 | 1.26796E-17 | 5.94838E-16 | Up-Regulated |
| <i>BGN</i>     | 1.586 | 1.59439E-17 | 7.25449E-16 | Up-Regulated |
| <i>MMP7</i>    | 2.582 | 2.11277E-17 | 9.35939E-16 | Up-Regulated |
| <i>MX1</i>     | 1.383 | 2.36066E-17 | 1.03362E-15 | Up-Regulated |
| <i>LDHA</i>    | 1.038 | 2.41231E-17 | 1.05015E-15 | Up-Regulated |
| <i>SQLE</i>    | 1.101 | 3.96162E-17 | 1.65316E-15 | Up-Regulated |
| <i>TOP2A</i>   | 2.074 | 5.65143E-17 | 2.29491E-15 | Up-Regulated |
| <i>CORO1C</i>  | 1.165 | 5.99609E-17 | 2.41539E-15 | Up-Regulated |

|                |       |             |             |              |
|----------------|-------|-------------|-------------|--------------|
| <i>THY1</i>    | 1.339 | 6.28914E-17 | 2.52E-15    | Up-Regulated |
| <i>MMP11</i>   | 1.411 | 6.40908E-17 | 2.5545E-15  | Up-Regulated |
| <i>CLIC1</i>   | 1.023 | 6.58877E-17 | 2.61233E-15 | Up-Regulated |
| <i>CTSB</i>    | 1.060 | 6.75911E-17 | 2.65894E-15 | Up-Regulated |
| <i>OLR1</i>    | 2.105 | 8.03876E-17 | 3.07427E-15 | Up-Regulated |
| <i>TFF1</i>    | 3.213 | 8.83286E-17 | 3.32741E-15 | Up-Regulated |
| <i>MMP1</i>    | 3.116 | 8.92279E-17 | 3.35293E-15 | Up-Regulated |
| <i>CDH11</i>   | 1.338 | 1.03343E-16 | 3.81742E-15 | Up-Regulated |
| <i>KIF14</i>   | 1.181 | 1.48625E-16 | 5.30763E-15 | Up-Regulated |
| <i>YWHAZ</i>   | 1.015 | 1.9324E-16  | 6.72598E-15 | Up-Regulated |
| <i>CMTM3</i>   | 1.005 | 2.07359E-16 | 7.15152E-15 | Up-Regulated |
| <i>EDNRA</i>   | 1.782 | 3.34831E-16 | 1.0716E-14  | Up-Regulated |
| <i>NDC80</i>   | 1.431 | 4.33743E-16 | 1.34817E-14 | Up-Regulated |
| <i>CTSK</i>    | 1.657 | 4.52339E-16 | 1.39166E-14 | Up-Regulated |
| <i>LGALS1</i>  | 1.589 | 5.93138E-16 | 1.77777E-14 | Up-Regulated |
| <i>TRIM29</i>  | 1.230 | 6.16585E-16 | 1.83727E-14 | Up-Regulated |
| <i>TXN</i>     | 1.012 | 6.17749E-16 | 1.83727E-14 | Up-Regulated |
| <i>ANXA1</i>   | 1.519 | 6.74158E-16 | 1.98129E-14 | Up-Regulated |
| <i>HK1</i>     | 1.091 | 7.64906E-16 | 2.20509E-14 | Up-Regulated |
| <i>ADAM9</i>   | 1.407 | 1.02266E-15 | 2.86081E-14 | Up-Regulated |
| <i>GBP2</i>    | 1.186 | 1.26479E-15 | 3.4425E-14  | Up-Regulated |
| <i>VASP</i>    | 1.011 | 1.48913E-15 | 3.95339E-14 | Up-Regulated |
| <i>CXCL8</i>   | 2.250 | 2.06172E-15 | 5.29666E-14 | Up-Regulated |
| <i>TNFAIP2</i> | 1.051 | 2.36292E-15 | 5.98897E-14 | Up-Regulated |
| <i>DPYSL3</i>  | 1.416 | 2.3915E-15  | 6.04113E-14 | Up-Regulated |
| <i>MIA</i>     | 1.458 | 3.27425E-15 | 7.92641E-14 | Up-Regulated |
| <i>MDK</i>     | 1.407 | 4.37578E-15 | 1.03121E-13 | Up-Regulated |
| <i>TWIST1</i>  | 1.532 | 4.87368E-15 | 1.13014E-13 | Up-Regulated |
| <i>ITGB6</i>   | 1.716 | 5.35752E-15 | 1.23558E-13 | Up-Regulated |
| <i>MMP2</i>    | 1.571 | 5.74944E-15 | 1.31393E-13 | Up-Regulated |
| <i>EPHA2</i>   | 1.110 | 7.12237E-15 | 1.60344E-13 | Up-Regulated |
| <i>EPSTI1</i>  | 1.169 | 7.36535E-15 | 1.64344E-13 | Up-Regulated |
| <i>PLOD2</i>   | 1.068 | 1.07931E-14 | 2.30609E-13 | Up-Regulated |
| <i>RARRES3</i> | 1.444 | 1.19768E-14 | 2.52453E-13 | Up-Regulated |
| <i>CENPW</i>   | 1.121 | 1.21959E-14 | 2.5659E-13  | Up-Regulated |
| <i>S100A2</i>  | 1.904 | 1.83378E-14 | 3.73331E-13 | Up-Regulated |
| <i>CCNB1</i>   | 1.303 | 2.32886E-14 | 4.59657E-13 | Up-Regulated |
| <i>F2R</i>     | 1.090 | 3.49847E-14 | 6.64753E-13 | Up-Regulated |
| <i>MACC1</i>   | 1.086 | 4.00144E-14 | 7.50878E-13 | Up-Regulated |
| <i>ITGB1</i>   | 1.152 | 4.48617E-14 | 8.32531E-13 | Up-Regulated |
| <i>F3</i>      | 1.054 | 4.80561E-14 | 8.84209E-13 | Up-Regulated |
| <i>EGLN3</i>   | 1.353 | 4.87081E-14 | 8.91008E-13 | Up-Regulated |
| <i>PDGFRB</i>  | 1.062 | 6.3265E-14  | 1.11255E-12 | Up-Regulated |
| <i>ASPEN</i>   | 1.422 | 8.02843E-14 | 1.37347E-12 | Up-Regulated |
| <i>S100A14</i> | 1.276 | 8.35303E-14 | 1.41936E-12 | Up-Regulated |
| <i>IL18</i>    | 1.261 | 8.87455E-14 | 1.49619E-12 | Up-Regulated |
| <i>CLDN18</i>  | 2.542 | 1.06104E-13 | 1.75554E-12 | Up-Regulated |
| <i>COL1A1</i>  | 1.345 | 1.15758E-13 | 1.89452E-12 | Up-Regulated |
| <i>KRT8</i>    | 1.419 | 1.16049E-13 | 1.89723E-12 | Up-Regulated |
| <i>LIF</i>     | 1.126 | 1.23973E-13 | 2.01585E-12 | Up-Regulated |
| <i>CLDN1</i>   | 1.419 | 1.68431E-13 | 2.64207E-12 | Up-Regulated |
| <i>TIMP2</i>   | 1.062 | 2.05992E-13 | 3.13998E-12 | Up-Regulated |

|                  |       |             |             |              |
|------------------|-------|-------------|-------------|--------------|
| <i>FBN1</i>      | 1.455 | 2.46313E-13 | 3.70968E-12 | Up-Regulated |
| <i>MXD1</i>      | 1.308 | 2.61033E-13 | 3.90026E-12 | Up-Regulated |
| <i>LIMA1</i>     | 1.291 | 2.92145E-13 | 4.29712E-12 | Up-Regulated |
| <i>CXCL3</i>     | 1.599 | 3.02208E-13 | 4.4279E-12  | Up-Regulated |
| <i>PTPRR</i>     | 1.226 | 3.68252E-13 | 5.27281E-12 | Up-Regulated |
| <i>FSCN1</i>     | 1.005 | 5.74227E-13 | 7.84292E-12 | Up-Regulated |
| <i>GSDMB</i>     | 1.077 | 6.62235E-13 | 8.90803E-12 | Up-Regulated |
| <i>PTTG1</i>     | 1.089 | 7.25558E-13 | 9.63118E-12 | Up-Regulated |
| <i>AURKA</i>     | 1.088 | 9.48464E-13 | 1.21729E-11 | Up-Regulated |
| <i>FZD7</i>      | 1.105 | 9.92186E-13 | 1.26695E-11 | Up-Regulated |
| <i>RAB25</i>     | 1.549 | 1.22381E-12 | 1.51905E-11 | Up-Regulated |
| <i>ROBO1</i>     | 1.270 | 1.30972E-12 | 1.60982E-11 | Up-Regulated |
| <i>TNFRSF11B</i> | 1.205 | 1.73798E-12 | 2.06561E-11 | Up-Regulated |
| <i>CSTA</i>      | 1.561 | 1.89723E-12 | 2.23554E-11 | Up-Regulated |
| <i>ACTA2</i>     | 1.317 | 1.90984E-12 | 2.24864E-11 | Up-Regulated |
| <i>TPX2</i>      | 1.051 | 2.8211E-12  | 3.19452E-11 | Up-Regulated |
| <i>PSCA</i>      | 1.891 | 3.70686E-12 | 4.06061E-11 | Up-Regulated |
| <i>ADAM12</i>    | 1.365 | 4.24067E-12 | 4.57242E-11 | Up-Regulated |
| <i>DUSP6</i>     | 1.077 | 4.93668E-12 | 5.22956E-11 | Up-Regulated |
| <i>ID1</i>       | 1.385 | 5.06156E-12 | 5.34311E-11 | Up-Regulated |
| <i>CEMIP</i>     | 1.332 | 6.33802E-12 | 6.47782E-11 | Up-Regulated |
| <i>MUC20</i>     | 1.023 | 6.76482E-12 | 6.86757E-11 | Up-Regulated |
| <i>ADAM28</i>    | 1.061 | 9.40456E-12 | 9.21305E-11 | Up-Regulated |
| <i>EZR</i>       | 1.032 | 1.01101E-11 | 9.78996E-11 | Up-Regulated |
| <i>IFITM1</i>    | 1.031 | 1.29914E-11 | 1.21893E-10 | Up-Regulated |
| <i>MSN</i>       | 1.045 | 1.44262E-11 | 1.33123E-10 | Up-Regulated |
| <i>CLIC3</i>     | 1.289 | 1.48269E-11 | 1.35955E-10 | Up-Regulated |
| <i>IRF7</i>      | 1.004 | 1.70301E-11 | 1.53038E-10 | Up-Regulated |
| <i>PPARG</i>     | 1.023 | 1.81673E-11 | 1.62196E-10 | Up-Regulated |
| <i>SFRP2</i>     | 1.815 | 3.43849E-11 | 2.86338E-10 | Up-Regulated |
| <i>MMP12</i>     | 2.147 | 4.71547E-11 | 3.81327E-10 | Up-Regulated |
| <i>GPR87</i>     | 1.353 | 5.02891E-11 | 4.04078E-10 | Up-Regulated |
| <i>PRRX1</i>     | 1.203 | 6.87445E-11 | 5.32608E-10 | Up-Regulated |
| <i>KLK7</i>      | 1.313 | 7.95897E-11 | 6.06907E-10 | Up-Regulated |
| <i>SPP1</i>      | 1.573 | 1.29766E-10 | 9.35231E-10 | Up-Regulated |
| <i>GPNUMB</i>    | 1.310 | 1.45843E-10 | 1.03969E-09 | Up-Regulated |
| <i>KRT18</i>     | 1.122 | 1.69825E-10 | 1.19098E-09 | Up-Regulated |
| <i>TSPAN8</i>    | 1.851 | 1.70566E-10 | 1.19563E-09 | Up-Regulated |
| <i>LOX</i>       | 1.406 | 1.94504E-10 | 1.34655E-09 | Up-Regulated |
| <i>TAGLN</i>     | 1.202 | 2.75256E-10 | 1.84473E-09 | Up-Regulated |
| <i>MUC16</i>     | 1.409 | 4.47633E-10 | 2.84474E-09 | Up-Regulated |
| <i>GJA1</i>      | 1.110 | 4.49878E-10 | 2.8566E-09  | Up-Regulated |
| <i>SERPINB3</i>  | 1.566 | 6.17616E-10 | 3.7941E-09  | Up-Regulated |
| <i>THBS1</i>     | 1.270 | 7.48846E-10 | 4.53026E-09 | Up-Regulated |
| <i>BIRC3</i>     | 1.037 | 7.49465E-10 | 4.53219E-09 | Up-Regulated |
| <i>PLA2G10</i>   | 1.041 | 1.05918E-09 | 6.22326E-09 | Up-Regulated |
| <i>GALNT3</i>    | 1.049 | 1.07759E-09 | 6.32161E-09 | Up-Regulated |
| <i>AGR3</i>      | 1.959 | 1.16719E-09 | 6.78397E-09 | Up-Regulated |
| <i>PROM1</i>     | 1.636 | 1.22819E-09 | 7.10029E-09 | Up-Regulated |
| <i>SOX9</i>      | 1.133 | 1.36763E-09 | 7.82556E-09 | Up-Regulated |
| <i>CYP3A5</i>    | 1.519 | 1.69432E-09 | 9.51112E-09 | Up-Regulated |
| <i>CXCL14</i>    | 1.494 | 1.73761E-09 | 9.72161E-09 | Up-Regulated |

|               |        |             |             |                |
|---------------|--------|-------------|-------------|----------------|
| <i>SNAI2</i>  | 1.096  | 1.88E-09    | 1.04179E-08 | Up-Regulated   |
| <i>KLK6</i>   | 1.078  | 4.11824E-09 | 2.11887E-08 | Up-Regulated   |
| <i>MUC1</i>   | 1.410  | 5.01873E-09 | 2.53385E-08 | Up-Regulated   |
| <i>PMP22</i>  | 1.033  | 5.20828E-09 | 2.62429E-08 | Up-Regulated   |
| <i>ODAM</i>   | 1.256  | 5.26415E-09 | 2.65042E-08 | Up-Regulated   |
| <i>AKR1C3</i> | 1.209  | 1.44312E-08 | 6.65218E-08 | Up-Regulated   |
| <i>CST6</i>   | 1.077  | 2.12425E-08 | 9.43236E-08 | Up-Regulated   |
| <i>IL7</i>    | 1.036  | 2.25141E-08 | 9.93857E-08 | Up-Regulated   |
| <i>CYP1B1</i> | 1.448  | 2.32558E-08 | 1.02212E-07 | Up-Regulated   |
| <i>MUC13</i>  | 1.198  | 3.38845E-08 | 1.44024E-07 | Up-Regulated   |
| <i>TFF2</i>   | 1.942  | 4.61486E-08 | 1.90835E-07 | Up-Regulated   |
| <i>CCL18</i>  | 1.263  | 9.68537E-08 | 3.75435E-07 | Up-Regulated   |
| <i>PTGS2</i>  | 1.334  | 2.87499E-07 | 1.02043E-06 | Up-Regulated   |
| <i>REG4</i>   | 2.122  | 5.30651E-07 | 1.79691E-06 | Up-Regulated   |
| <i>CXCR4</i>  | 1.169  | 5.3842E-07  | 1.8224E-06  | Up-Regulated   |
| <i>MMP10</i>  | 1.113  | 5.96684E-07 | 2.00078E-06 | Up-Regulated   |
| <i>TFF3</i>   | 1.248  | 7.11225E-07 | 2.3549E-06  | Up-Regulated   |
| <i>CHI3L1</i> | 1.135  | 8.01269E-07 | 2.62616E-06 | Up-Regulated   |
| <i>IGFBP1</i> | 1.032  | 2.41993E-06 | 7.2936E-06  | Up-Regulated   |
| <i>EPCAM</i>  | 1.121  | 1.09428E-05 | 2.93302E-05 | Up-Regulated   |
| <i>CDH17</i>  | 1.044  | 0.0002552   | 0.000529546 | Up-Regulated   |
| <i>PDCD4</i>  | -1.060 | 2.46429E-19 | 1.84759E-17 | Down-Regulated |
| <i>CTNND2</i> | -1.372 | 7.14833E-15 | 1.6045E-13  | Down-Regulated |
| <i>LIFR</i>   | -1.129 | 1.14751E-14 | 2.44146E-13 | Down-Regulated |
| <i>LGALS2</i> | -1.847 | 1.55359E-14 | 3.18866E-13 | Down-Regulated |
| <i>NUCB2</i>  | -1.276 | 5.52708E-13 | 7.57642E-12 | Down-Regulated |
| <i>BNIP3</i>  | -1.512 | 2.18662E-12 | 2.52918E-11 | Down-Regulated |
| <i>PRDX4</i>  | -1.117 | 1.13658E-11 | 1.07847E-10 | Down-Regulated |
| <i>AQP8</i>   | -2.859 | 1.3214E-11  | 1.2363E-10  | Down-Regulated |
| <i>EGF</i>    | -2.062 | 1.46148E-11 | 1.34371E-10 | Down-Regulated |
| <i>PLCE1</i>  | -1.272 | 2.8532E-11  | 2.42819E-10 | Down-Regulated |
| <i>DPEP1</i>  | -1.261 | 9.81142E-11 | 7.28311E-10 | Down-Regulated |
| <i>CXCL12</i> | -1.111 | 2.186E-10   | 1.50509E-09 | Down-Regulated |
| <i>TSPAN7</i> | -1.059 | 5.02373E-10 | 3.15477E-09 | Down-Regulated |
| <i>RNASE1</i> | -1.188 | 1.47475E-09 | 8.38136E-09 | Down-Regulated |
| <i>TMEM97</i> | -1.307 | 3.63873E-07 | 1.26689E-06 | Down-Regulated |
| <i>IGFBP2</i> | -1.565 | 1.31278E-06 | 4.14785E-06 | Down-Regulated |
| <i>LYVE1</i>  | -1.014 | 1.83383E-05 | 4.70719E-05 | Down-Regulated |
| <i>PRSS3</i>  | -1.765 | 1.86821E-05 | 4.78974E-05 | Down-Regulated |
| <i>FAM3B</i>  | -1.154 | 0.00016175  | 0.000348669 | Down-Regulated |

---



**Table S4. Enrichment analysis**

| Category         | Term                                                                                       | Count | %           | PValue      |
|------------------|--------------------------------------------------------------------------------------------|-------|-------------|-------------|
| GOTERM_BP_DIRECT | GO:0007155~cell adhesion                                                                   | 39    | 15.85365854 | 8.72103E-19 |
| GOTERM_BP_DIRECT | GO:0022617~extracellular matrix disassembly                                                | 16    | 6.504065041 | 1.58595E-13 |
| GOTERM_BP_DIRECT | GO:0030198~extracellular matrix organization                                               | 22    | 8.943089431 | 6.15769E-13 |
| GOTERM_BP_DIRECT | GO:0042060~wound healing                                                                   | 13    | 5.284552846 | 1.28156E-09 |
| GOTERM_BP_DIRECT | GO:0007165~signal transduction                                                             | 45    | 18.29268293 | 1.68451E-09 |
| GOTERM_BP_DIRECT | GO:0030574~collagen catabolic process                                                      | 11    | 4.471544715 | 2.09882E-08 |
| GOTERM_BP_DIRECT | GO:0042493~response to drug                                                                | 20    | 8.130081301 | 7.09106E-08 |
| GOTERM_BP_DIRECT | GO:0008284~positive regulation of cell proliferation                                       | 23    | 9.349593496 | 8.58517E-07 |
| GOTERM_BP_DIRECT | GO:0001666~response to hypoxia                                                             | 14    | 5.691056911 | 1.06001E-06 |
| GOTERM_BP_DIRECT | GO:0016477~cell migration                                                                  | 14    | 5.691056911 | 1.06001E-06 |
| GOTERM_BP_DIRECT | GO:0043066~negative regulation of apoptotic process                                        | 22    | 8.943089431 | 2.1985E-06  |
| GOTERM_BP_DIRECT | GO:0043434~response to peptide hormone                                                     | 8     | 3.25203252  | 2.57906E-06 |
| GOTERM_BP_DIRECT | GO:0001525~angiogenesis                                                                    | 15    | 6.097560976 | 3.6781E-06  |
| GOTERM_BP_DIRECT | GO:0006954~inflammatory response                                                           | 19    | 7.723577236 | 8.06111E-06 |
| GOTERM_BP_DIRECT | GO:0030199~collagen fibril organization                                                    | 7     | 2.845528455 | 1.67874E-05 |
| GOTERM_BP_DIRECT | GO:0001649~osteoblast differentiation                                                      | 10    | 4.06504065  | 1.69349E-05 |
| GOTERM_BP_DIRECT | GO:0001558~regulation of cell growth                                                       | 9     | 3.658536585 | 1.74324E-05 |
| GOTERM_BP_DIRECT | GO:0009612~response to mechanical stimulus                                                 | 8     | 3.25203252  | 1.91681E-05 |
| GOTERM_BP_DIRECT | GO:0006928~movement of cell or subcellular component                                       | 9     | 3.658536585 | 2.96656E-05 |
| GOTERM_BP_DIRECT | GO:0098609~cell-cell adhesion                                                              | 15    | 6.097560976 | 3.37603E-05 |
| GOTERM_BP_DIRECT | GO:0045766~positive regulation of angiogenesis                                             | 10    | 4.06504065  | 3.78804E-05 |
| GOTERM_BP_DIRECT | GO:0033627~cell adhesion mediated by integrin                                              | 5     | 2.032520325 | 4.75038E-05 |
| GOTERM_BP_DIRECT | GO:0090004~positive regulation of establishment of protein localization to plasma membrane | 6     | 2.43902439  | 5.85099E-05 |
| GOTERM_BP_DIRECT | GO:0007507~heart development                                                               | 12    | 4.87804878  | 6.11959E-05 |
| GOTERM_BP_DIRECT | GO:0030335~positive regulation of cell migration                                           | 12    | 4.87804878  | 6.42846E-05 |
| GOTERM_BP_DIRECT | GO:0010628~positive regulation of gene expression                                          | 14    | 5.691056911 | 9.70207E-05 |
| GOTERM_BP_DIRECT | GO:0046718~viral entry into host cell                                                      | 8     | 3.25203252  | 0.000138736 |
| GOTERM_BP_DIRECT | GO:0001501~skeletal system development                                                     | 10    | 4.06504065  | 0.000147454 |
| GOTERM_BP_DIRECT | GO:0046697~decidualization                                                                 | 5     | 2.032520325 | 0.000159469 |
| GOTERM_BP_DIRECT | GO:0008285~negative regulation of cell proliferation                                       | 17    | 6.910569106 | 0.000174741 |
| GOTERM_BP_DIRECT | GO:0060070~canonical Wnt signaling pathway                                                 | 8     | 3.25203252  | 0.000174929 |
| GOTERM_BP_DIRECT | GO:0009611~response to wounding                                                            | 7     | 2.845528455 | 0.000263354 |
| GOTERM_BP_DIRECT | GO:0007160~cell-matrix adhesion                                                            | 8     | 3.25203252  | 0.000289501 |
| GOTERM_BP_DIRECT | GO:0051384~response to glucocorticoid                                                      | 7     | 2.845528455 | 0.000312703 |
| GOTERM_BP_DIRECT | GO:0048333~mesodermal cell differentiation                                                 | 4     | 1.62601626  | 0.000426492 |
| GOTERM_BP_DIRECT | GO:0071260~cellular response to mechanical stimulus                                        | 7     | 2.845528455 | 0.000505268 |
| GOTERM_BP_DIRECT | GO:0007229~integrin-mediated signaling pathway                                             | 8     | 3.25203252  | 0.000518052 |
| GOTERM_BP_DIRECT | GO:0071560~cellular response to transforming growth factor beta stimulus                   | 6     | 2.43902439  | 0.000629074 |
| GOTERM_BP_DIRECT | GO:0007584~response to nutrient                                                            | 7     | 2.845528455 | 0.000630928 |
| GOTERM_BP_DIRECT | GO:0002576~platelet degranulation                                                          | 8     | 3.25203252  | 0.00065736  |
| GOTERM_BP_DIRECT | GO:0043542~endothelial cell migration                                                      | 5     | 2.032520325 | 0.00070732  |

|                  |                                                                                           |    |             |             |
|------------------|-------------------------------------------------------------------------------------------|----|-------------|-------------|
| GOTERM_BP_DIRECT | GO:0006508~proteolysis                                                                    | 18 | 7.317073171 | 0.000806691 |
| GOTERM_BP_DIRECT | GO:0051017~actin filament bundle assembly                                                 | 5  | 2.032520325 | 0.000807137 |
| GOTERM_BP_DIRECT | GO:0010812~negative regulation of cell-substrate adhesion                                 | 4  | 1.62601626  | 0.00091172  |
| GOTERM_BP_DIRECT | GO:0001503~ossification                                                                   | 7  | 2.845528455 | 0.000953886 |
| GOTERM_BP_DIRECT | GO:0009615~response to virus                                                              | 8  | 3.25203252  | 0.000971271 |
| GOTERM_BP_DIRECT | GO:0048146~positive regulation of fibroblast proliferation                                | 6  | 2.43902439  | 0.000985148 |
| GOTERM_BP_DIRECT | GO:0007267~cell-cell signaling                                                            | 12 | 4.87804878  | 0.001026738 |
| GOTERM_BP_DIRECT | GO:0043065~positive regulation of apoptotic process                                       | 13 | 5.284552846 | 0.001225944 |
| GOTERM_BP_DIRECT | GO:0051897~positive regulation of protein kinase B signaling                              | 7  | 2.845528455 | 0.00123123  |
| GOTERM_BP_DIRECT | GO:0070301~cellular response to hydrogen peroxide                                         | 6  | 2.43902439  | 0.001260256 |
| GOTERM_BP_DIRECT | GO:0042127~regulation of cell proliferation                                               | 10 | 4.06504065  | 0.001299008 |
| GOTERM_BP_DIRECT | GO:0001837~epithelial to mesenchymal transition                                           | 5  | 2.032520325 | 0.001306671 |
| GOTERM_BP_DIRECT | GO:0051216~cartilage development                                                          | 6  | 2.43902439  | 0.001472745 |
| GOTERM_BP_DIRECT | GO:0010951~negative regulation of endopeptidase activity                                  | 8  | 3.25203252  | 0.001690816 |
| GOTERM_BP_DIRECT | GO:0006935~chemotaxis                                                                     | 8  | 3.25203252  | 0.001772551 |
| GOTERM_BP_DIRECT | GO:0050900~leukocyte migration                                                            | 8  | 3.25203252  | 0.001772551 |
| GOTERM_BP_DIRECT | GO:0032355~response to estradiol                                                          | 7  | 2.845528455 | 0.001860252 |
| GOTERM_BP_DIRECT | GO:0009653~anatomical structure morphogenesis                                             | 7  | 2.845528455 | 0.001966914 |
| GOTERM_BP_DIRECT | GO:0043627~response to estrogen                                                           | 6  | 2.43902439  | 0.002268786 |
| GOTERM_BP_DIRECT | GO:0090090~negative regulation of canonical Wnt signaling pathway                         | 9  | 3.658536585 | 0.002270892 |
| GOTERM_BP_DIRECT | GO:0030336~negative regulation of cell migration                                          | 7  | 2.845528455 | 0.002314772 |
| GOTERM_BP_DIRECT | GO:0045184~establishment of protein localization                                          | 5  | 2.032520325 | 0.002409752 |
| GOTERM_BP_DIRECT | GO:0006952~defense response                                                               | 6  | 2.43902439  | 0.002592844 |
| GOTERM_BP_DIRECT | GO:0001957~intramembranous ossification                                                   | 3  | 1.219512195 | 0.002890084 |
| GOTERM_BP_DIRECT | GO:0045987~positive regulation of smooth muscle contraction                               | 4  | 1.62601626  | 0.00309622  |
| GOTERM_BP_DIRECT | GO:0030855~epithelial cell differentiation                                                | 6  | 2.43902439  | 0.003140075 |
| GOTERM_BP_DIRECT | GO:0071300~cellular response to retinoic acid                                             | 6  | 2.43902439  | 0.003140075 |
| GOTERM_BP_DIRECT | GO:0030155~regulation of cell adhesion                                                    | 5  | 2.032520325 | 0.003148148 |
| GOTERM_BP_DIRECT | GO:0070098~chemokine-mediated signaling pathway                                           | 6  | 2.43902439  | 0.003339681 |
| GOTERM_BP_DIRECT | GO:0090103~cochlea morphogenesis                                                          | 4  | 1.62601626  | 0.003547918 |
| GOTERM_BP_DIRECT | GO:0043567~regulation of insulin-like growth factor receptor signaling pathway            | 3  | 1.219512195 | 0.004008375 |
| GOTERM_BP_DIRECT | GO:0000187~activation of MAPK activity                                                    | 7  | 2.845528455 | 0.004184996 |
| GOTERM_BP_DIRECT | GO:0030216~keratinocyte differentiation                                                   | 6  | 2.43902439  | 0.004476692 |
| GOTERM_BP_DIRECT | GO:0071356~cellular response to tumor necrosis factor                                     | 7  | 2.845528455 | 0.004789709 |
| GOTERM_BP_DIRECT | GO:0033629~negative regulation of cell adhesion mediated by integrin                      | 3  | 1.219512195 | 0.005294705 |
| GOTERM_BP_DIRECT | GO:0060054~positive regulation of epithelial cell proliferation involved in wound healing | 3  | 1.219512195 | 0.005294705 |
| GOTERM_BP_DIRECT | GO:0018149~peptide cross-linking                                                          | 5  | 2.032520325 | 0.005439413 |
| GOTERM_BP_DIRECT | GO:0061621~canonical glycolysis                                                           | 4  | 1.62601626  | 0.005745781 |
| GOTERM_BP_DIRECT | GO:0035025~positive regulation of Rho protein signal transduction                         | 4  | 1.62601626  | 0.005745781 |
| GOTERM_BP_DIRECT | GO:0042542~response to hydrogen peroxide                                                  | 5  | 2.032520325 | 0.005837885 |
| GOTERM_BP_DIRECT | GO:0034097~response to cytokine                                                           | 5  | 2.032520325 | 0.006255344 |
| GOTERM_BP_DIRECT | GO:0010800~positive regulation of peptidyl-threonine phosphorylation                      | 4  | 1.62601626  | 0.006397206 |
| GOTERM_BP_DIRECT | GO:0035987~endodermal cell differentiation                                                | 4  | 1.62601626  | 0.006397206 |
| GOTERM_BP_DIRECT | GO:0044267~cellular protein metabolic process                                             | 7  | 2.845528455 | 0.006714821 |

|                  |                                                                                                          |    |             |             |
|------------------|----------------------------------------------------------------------------------------------------------|----|-------------|-------------|
| GOTERM_BP_DIRECT | GO:0045198~establishment of epithelial cell apical/basal polarity                                        | 3  | 1.219512195 | 0.006744126 |
| GOTERM_BP_DIRECT | GO:0006915~apoptotic process                                                                             | 17 | 6.910569106 | 0.007069602 |
| GOTERM_BP_DIRECT | GO:0043388~positive regulation of DNA binding                                                            | 4  | 1.62601626  | 0.007090884 |
| GOTERM_BP_DIRECT | GO:0007411~axon guidance                                                                                 | 8  | 3.25203252  | 0.007542748 |
| GOTERM_BP_DIRECT | GO:0060548~negative regulation of cell death                                                             | 5  | 2.032520325 | 0.007625391 |
| GOTERM_BP_DIRECT | GO:0030203~glycosaminoglycan metabolic process                                                           | 4  | 1.62601626  | 0.007827449 |
| GOTERM_BP_DIRECT | GO:0040037~negative regulation of fibroblast growth factor receptor signaling pathway                    | 3  | 1.219512195 | 0.008351794 |
| GOTERM_BP_DIRECT | GO:0071803~positive regulation of podosome assembly                                                      | 3  | 1.219512195 | 0.008351794 |
| GOTERM_BP_DIRECT | GO:0044344~cellular response to fibroblast growth factor stimulus                                        | 4  | 1.62601626  | 0.008607483 |
| GOTERM_BP_DIRECT | GO:0071407~cellular response to organic cyclic compound                                                  | 5  | 2.032520325 | 0.009739928 |
| GOTERM_BP_DIRECT | GO:0016266~O-glycan processing                                                                           | 5  | 2.032520325 | 0.010322184 |
| GOTERM_BP_DIRECT | GO:0048661~positive regulation of smooth muscle cell proliferation                                       | 5  | 2.032520325 | 0.010322184 |
| GOTERM_BP_DIRECT | GO:0045669~positive regulation of osteoblast differentiation                                             | 5  | 2.032520325 | 0.010322184 |
| GOTERM_BP_DIRECT | GO:0008584~male gonad development                                                                        | 6  | 2.43902439  | 0.010845629 |
| GOTERM_BP_DIRECT | GO:0015758~glucose transport                                                                             | 4  | 1.62601626  | 0.011213457 |
| GOTERM_BP_DIRECT | GO:0010634~positive regulation of epithelial cell migration                                              | 4  | 1.62601626  | 0.011213457 |
| GOTERM_BP_DIRECT | GO:0071364~cellular response to epidermal growth factor stimulus                                         | 4  | 1.62601626  | 0.011213457 |
| GOTERM_BP_DIRECT | GO:0006977~DNA damage response, signal transduction by p53 class mediator resulting in cell cycle arrest | 5  | 2.032520325 | 0.01155321  |
| GOTERM_BP_DIRECT | GO:0090179~planar cell polarity pathway involved in neural tube closure                                  | 3  | 1.219512195 | 0.012023024 |
| GOTERM_BP_DIRECT | GO:0035413~positive regulation of catenin import into nucleus                                            | 3  | 1.219512195 | 0.012023024 |
| GOTERM_BP_DIRECT | GO:0006096~glycolytic process                                                                            | 4  | 1.62601626  | 0.012172178 |
| GOTERM_BP_DIRECT | GO:0007586~digestion                                                                                     | 5  | 2.032520325 | 0.012202562 |
| GOTERM_BP_DIRECT | GO:0060337~type I interferon signaling pathway                                                           | 5  | 2.032520325 | 0.012874845 |
| GOTERM_BP_DIRECT | GO:0014032~neural crest cell development                                                                 | 3  | 1.219512195 | 0.01407741  |
| GOTERM_BP_DIRECT | GO:0016337~single organismal cell-cell adhesion                                                          | 6  | 2.43902439  | 0.014461836 |
| GOTERM_BP_DIRECT | GO:0034332~adherens junction organization                                                                | 4  | 1.62601626  | 0.015323296 |
| GOTERM_BP_DIRECT | GO:0045893~positive regulation of transcription, DNA-templated                                           | 15 | 6.097560976 | 0.015324923 |
| GOTERM_BP_DIRECT | GO:1902230~negative regulation of intrinsic apoptotic signaling pathway in response to DNA damage        | 3  | 1.219512195 | 0.016271691 |
| GOTERM_BP_DIRECT | GO:0043508~negative regulation of JUN kinase activity                                                    | 3  | 1.219512195 | 0.016271691 |
| GOTERM_BP_DIRECT | GO:2000353~positive regulation of endothelial cell apoptotic process                                     | 3  | 1.219512195 | 0.016271691 |
| GOTERM_BP_DIRECT | GO:0010839~negative regulation of keratinocyte proliferation                                             | 3  | 1.219512195 | 0.016271691 |
| GOTERM_BP_DIRECT | GO:0033138~positive regulation of peptidyl-serine phosphorylation                                        | 5  | 2.032520325 | 0.017404267 |
| GOTERM_BP_DIRECT | GO:0071347~cellular response to interleukin-1                                                            | 5  | 2.032520325 | 0.018243944 |
| GOTERM_BP_DIRECT | GO:0002042~cell migration involved in sprouting angiogenesis                                             | 3  | 1.219512195 | 0.018601525 |
| GOTERM_BP_DIRECT | GO:0006821~chloride transport                                                                            | 4  | 1.62601626  | 0.018891761 |
| GOTERM_BP_DIRECT | GO:0045071~negative regulation of viral genome replication                                               | 4  | 1.62601626  | 0.018891761 |
| GOTERM_BP_DIRECT | GO:0032526~response to retinoic acid                                                                     | 4  | 1.62601626  | 0.020174719 |
| GOTERM_BP_DIRECT | GO:0030334~regulation of cell migration                                                                  | 5  | 2.032520325 | 0.020912357 |
| GOTERM_BP_DIRECT | GO:0090280~positive regulation of calcium ion import                                                     | 3  | 1.219512195 | 0.021062661 |
| GOTERM_BP_DIRECT | GO:0070848~response to growth factor                                                                     | 3  | 1.219512195 | 0.021062661 |
| GOTERM_BP_DIRECT | GO:0007566~embryo implantation                                                                           | 4  | 1.62601626  | 0.021504548 |
| GOTERM_BP_DIRECT | GO:0043086~negative regulation of catalytic activity                                                     | 5  | 2.032520325 | 0.021852207 |
| GOTERM_BP_DIRECT | GO:0060021~palate development                                                                            | 5  | 2.032520325 | 0.022817514 |
| GOTERM_BP_DIRECT | GO:0030324~lung development                                                                              | 5  | 2.032520325 | 0.022817514 |

|                  |                                                                                             |    |             |             |
|------------------|---------------------------------------------------------------------------------------------|----|-------------|-------------|
| GOTERM_BP_DIRECT | GO:0031623~receptor internalization                                                         | 4  | 1.62601626  | 0.022881278 |
| GOTERM_BP_DIRECT | GO:2000811~negative regulation of anoikis                                                   | 3  | 1.219512195 | 0.023650941 |
| GOTERM_BP_DIRECT | GO:0055093~response to hyperoxia                                                            | 3  | 1.219512195 | 0.023650941 |
| GOTERM_BP_DIRECT | GO:0030033~microvillus assembly                                                             | 3  | 1.219512195 | 0.023650941 |
| GOTERM_BP_DIRECT | GO:0050860~negative regulation of T cell receptor signaling pathway                         | 3  | 1.219512195 | 0.023650941 |
| GOTERM_BP_DIRECT | GO:0048514~blood vessel morphogenesis                                                       | 3  | 1.219512195 | 0.023650941 |
| GOTERM_BP_DIRECT | GO:0035567~non-canonical Wnt signaling pathway                                              | 3  | 1.219512195 | 0.023650941 |
| GOTERM_BP_DIRECT | GO:0010466~negative regulation of peptidase activity                                        | 3  | 1.219512195 | 0.023650941 |
| GOTERM_BP_DIRECT | GO:0010977~negative regulation of neuron projection development                             | 4  | 1.62601626  | 0.024304906 |
| GOTERM_BP_DIRECT | GO:0036342~post-anal tail morphogenesis                                                     | 3  | 1.219512195 | 0.0263623   |
| GOTERM_BP_DIRECT | GO:0043123~positive regulation of I-kappaB kinase/NF-kappaB signaling                       | 7  | 2.845528455 | 0.027022226 |
| GOTERM_BP_DIRECT | GO:0051591~response to cAMP                                                                 | 4  | 1.62601626  | 0.027292695 |
| GOTERM_BP_DIRECT | GO:0010595~positive regulation of endothelial cell migration                                | 4  | 1.62601626  | 0.027292695 |
| GOTERM_BP_DIRECT | GO:0043410~positive regulation of MAPK cascade                                              | 5  | 2.032520325 | 0.028030639 |
| GOTERM_BP_DIRECT | GO:1905049~negative regulation of metallopeptidase activity                                 | 2  | 0.81300813  | 0.028146778 |
| GOTERM_BP_DIRECT | GO:0097325~melanocyte proliferation                                                         | 2  | 0.81300813  | 0.028146778 |
| GOTERM_BP_DIRECT | GO:0071306~cellular response to vitamin E                                                   | 2  | 0.81300813  | 0.028146778 |
| GOTERM_BP_DIRECT | GO:0030825~positive regulation of cGMP metabolic process                                    | 2  | 0.81300813  | 0.028146778 |
| GOTERM_BP_DIRECT | GO:0010710~regulation of collagen catabolic process                                         | 2  | 0.81300813  | 0.028146778 |
| GOTERM_BP_DIRECT | GO:1900020~positive regulation of protein kinase C activity                                 | 2  | 0.81300813  | 0.028146778 |
| GOTERM_BP_DIRECT | GO:0045600~positive regulation of fat cell differentiation                                  | 4  | 1.62601626  | 0.028856697 |
| GOTERM_BP_DIRECT | GO:0032956~regulation of actin cytoskeleton organization                                    | 4  | 1.62601626  | 0.028856697 |
| GOTERM_BP_DIRECT | GO:0031100~organ regeneration                                                               | 4  | 1.62601626  | 0.028856697 |
| GOTERM_BP_DIRECT | GO:0010975~regulation of neuron projection development                                      | 3  | 1.219512195 | 0.02919276  |
| GOTERM_BP_DIRECT | GO:0042246~tissue regeneration                                                              | 3  | 1.219512195 | 0.02919276  |
| GOTERM_BP_DIRECT | GO:0032496~response to lipopolysaccharide                                                   | 7  | 2.845528455 | 0.029213116 |
| GOTERM_BP_DIRECT | GO:0006919~activation of cysteine-type endopeptidase activity involved in apoptotic process | 5  | 2.032520325 | 0.030298421 |
| GOTERM_BP_DIRECT | GO:0014911~positive regulation of smooth muscle cell migration                              | 3  | 1.219512195 | 0.03213843  |
| GOTERM_BP_DIRECT | GO:0008544~epidermis development                                                            | 5  | 2.032520325 | 0.032671585 |
| GOTERM_BP_DIRECT | GO:0051894~positive regulation of focal adhesion assembly                                   | 3  | 1.219512195 | 0.035195504 |
| GOTERM_BP_DIRECT | GO:0042730~fibrinolysis                                                                     | 3  | 1.219512195 | 0.035195504 |
| GOTERM_BP_DIRECT | GO:0071277~cellular response to calcium ion                                                 | 4  | 1.62601626  | 0.035576961 |
| GOTERM_BP_DIRECT | GO:0006955~immune response                                                                  | 12 | 4.87804878  | 0.037670245 |
| GOTERM_BP_DIRECT | GO:0045727~positive regulation of translation                                               | 4  | 1.62601626  | 0.039212962 |
| GOTERM_BP_DIRECT | GO:0045662~negative regulation of myoblast differentiation                                  | 3  | 1.219512195 | 0.041629067 |
| GOTERM_BP_DIRECT | GO:0032967~positive regulation of collagen biosynthetic process                             | 3  | 1.219512195 | 0.041629067 |
| GOTERM_BP_DIRECT | GO:0042663~regulation of endodermal cell fate specification                                 | 2  | 0.81300813  | 0.041922899 |
| GOTERM_BP_DIRECT | GO:0006725~cellular aromatic compound metabolic process                                     | 2  | 0.81300813  | 0.041922899 |
| GOTERM_BP_DIRECT | GO:0035583~sequestering of TGFbeta in extracellular matrix                                  | 2  | 0.81300813  | 0.041922899 |
| GOTERM_BP_DIRECT | GO:0032487~regulation of Rap protein signal transduction                                    | 2  | 0.81300813  | 0.041922899 |
| GOTERM_BP_DIRECT | GO:0007204~positive regulation of cytosolic calcium ion concentration                       | 6  | 2.43902439  | 0.042129182 |
| GOTERM_BP_DIRECT | GO:0007173~epidermal growth factor receptor signaling pathway                               | 4  | 1.62601626  | 0.045006179 |
| GOTERM_BP_DIRECT | GO:0042733~embryonic digit morphogenesis                                                    | 4  | 1.62601626  | 0.045006179 |
| GOTERM_BP_DIRECT | GO:0030182~neuron differentiation                                                           | 5  | 2.032520325 | 0.046130997 |

|                  |                                                         |     |             |             |
|------------------|---------------------------------------------------------|-----|-------------|-------------|
| GOTERM_BP_DIRECT | GO:0042327~positive regulation of phosphorylation       | 3   | 1.219512195 | 0.048464657 |
| GOTERM_BP_DIRECT | GO:0034612~response to tumor necrosis factor            | 3   | 1.219512195 | 0.048464657 |
| GOTERM_BP_DIRECT | GO:0007159~leukocyte cell-cell adhesion                 | 3   | 1.219512195 | 0.048464657 |
| GOTERM_BP_DIRECT | GO:0031214~biomineral tissue development                | 3   | 1.219512195 | 0.048464657 |
| GOTERM_BP_DIRECT | GO:0070373~negative regulation of ERK1 and ERK2 cascade | 4   | 1.62601626  | 0.049090885 |
| GOTERM_BP_DIRECT | GO:0051592~response to calcium ion                      | 4   | 1.62601626  | 0.049090885 |
| GOTERM_BP_DIRECT | GO:0001701~in utero embryonic development               | 7   | 2.845528455 | 0.049890899 |
| GOTERM_CC_DIRECT | GO:0005615~extracellular space                          | 92  | 37.39837398 | 2.4068E-41  |
| GOTERM_CC_DIRECT | GO:0070062~extracellular exosome                        | 103 | 41.8699187  | 7.81364E-24 |
| GOTERM_CC_DIRECT | GO:0005578~proteinaceous extracellular matrix           | 30  | 12.19512195 | 2.39364E-18 |
| GOTERM_CC_DIRECT | GO:0031012~extracellular matrix                         | 29  | 11.78861789 | 3.19423E-16 |
| GOTERM_CC_DIRECT | GO:0005576~extracellular region                         | 65  | 26.42276423 | 5.24147E-16 |
| GOTERM_CC_DIRECT | GO:0005925~focal adhesion                               | 30  | 12.19512195 | 6.08752E-14 |
| GOTERM_CC_DIRECT | GO:0009986~cell surface                                 | 31  | 12.60162602 | 3.83878E-11 |
| GOTERM_CC_DIRECT | GO:0016324~apical plasma membrane                       | 20  | 8.130081301 | 1.2905E-08  |
| GOTERM_CC_DIRECT | GO:0005913~cell-cell adherens junction                  | 20  | 8.130081301 | 6.83331E-08 |
| GOTERM_CC_DIRECT | GO:0031982~vesicle                                      | 13  | 5.284552846 | 1.395E-07   |
| GOTERM_CC_DIRECT | GO:0005886~plasma membrane                              | 87  | 35.36585366 | 2.95405E-06 |
| GOTERM_CC_DIRECT | GO:0031528~microvillus membrane                         | 6   | 2.43902439  | 3.95721E-06 |
| GOTERM_CC_DIRECT | GO:0005796~Golgi lumen                                  | 10  | 4.06504065  | 5.25678E-06 |
| GOTERM_CC_DIRECT | GO:0071944~cell periphery                               | 7   | 2.845528455 | 1.16493E-05 |
| GOTERM_CC_DIRECT | GO:0048471~perinuclear region of cytoplasm              | 23  | 9.349593496 | 2.9934E-05  |
| GOTERM_CC_DIRECT | GO:0071438~invadopodium membrane                        | 4   | 1.62601626  | 4.49098E-05 |
| GOTERM_CC_DIRECT | GO:0016328~lateral plasma membrane                      | 7   | 2.845528455 | 7.01936E-05 |
| GOTERM_CC_DIRECT | GO:0042470~melanosome                                   | 8   | 3.25203252  | 0.000398036 |
| GOTERM_CC_DIRECT | GO:0016323~basolateral plasma membrane                  | 10  | 4.06504065  | 0.000690812 |
| GOTERM_CC_DIRECT | GO:0005737~cytoplasm                                    | 93  | 37.80487805 | 0.000979857 |
| GOTERM_CC_DIRECT | GO:0005887~integral component of plasma membrane        | 34  | 13.82113821 | 0.001096818 |
| GOTERM_CC_DIRECT | GO:0001726~ruffle                                       | 7   | 2.845528455 | 0.001266403 |
| GOTERM_CC_DIRECT | GO:0030027~lamellipodium                                | 9   | 3.658536585 | 0.00136351  |
| GOTERM_CC_DIRECT | GO:0045121~membrane raft                                | 10  | 4.06504065  | 0.001775488 |
| GOTERM_CC_DIRECT | GO:0030175~filopodium                                   | 6   | 2.43902439  | 0.002529975 |
| GOTERM_CC_DIRECT | GO:0005923~bicellular tight junction                    | 7   | 2.845528455 | 0.003995982 |
| GOTERM_CC_DIRECT | GO:0005882~intermediate filament                        | 7   | 2.845528455 | 0.003995982 |
| GOTERM_CC_DIRECT | GO:0031225~anchored component of membrane               | 7   | 2.845528455 | 0.003995982 |
| GOTERM_CC_DIRECT | GO:0005604~basement membrane                            | 6   | 2.43902439  | 0.004020885 |
| GOTERM_CC_DIRECT | GO:0030426~growth cone                                  | 7   | 2.845528455 | 0.004541893 |
| GOTERM_CC_DIRECT | GO:0032587~ruffle membrane                              | 6   | 2.43902439  | 0.004714772 |
| GOTERM_CC_DIRECT | GO:0008305~integrin complex                             | 4   | 1.62601626  | 0.005345833 |
| GOTERM_CC_DIRECT | GO:0042383~sarcolemma                                   | 6   | 2.43902439  | 0.005489782 |
| GOTERM_CC_DIRECT | GO:0031093~platelet alpha granule lumen                 | 5   | 2.032520325 | 0.006089339 |
| GOTERM_CC_DIRECT | GO:0005581~collagen trimer                              | 6   | 2.43902439  | 0.007640394 |
| GOTERM_CC_DIRECT | GO:0009897~external side of plasma membrane             | 9   | 3.658536585 | 0.007728172 |
| GOTERM_CC_DIRECT | GO:0015629~actin cytoskeleton                           | 9   | 3.658536585 | 0.008834129 |

|                  |                                                            |     |             |             |
|------------------|------------------------------------------------------------|-----|-------------|-------------|
| GOTERM_CC_DIRECT | GO:0031091~platelet alpha granule                          | 3   | 1.219512195 | 0.014385346 |
| GOTERM_CC_DIRECT | GO:0072686~mitotic spindle                                 | 4   | 1.62601626  | 0.017010652 |
| GOTERM_CC_DIRECT | GO:0045177~apical part of cell                             | 5   | 2.032520325 | 0.017685321 |
| GOTERM_CC_DIRECT | GO:0019898~extrinsic component of membrane                 | 5   | 2.032520325 | 0.023701701 |
| GOTERM_CC_DIRECT | GO:0032154~cleavage furrow                                 | 4   | 1.62601626  | 0.024423122 |
| GOTERM_CC_DIRECT | GO:0031258~lamellipodium membrane                          | 3   | 1.219512195 | 0.025883019 |
| GOTERM_CC_DIRECT | GO:0051233~spindle midzone                                 | 3   | 1.219512195 | 0.025883019 |
| GOTERM_CC_DIRECT | GO:0043034~costamere                                       | 3   | 1.219512195 | 0.025883019 |
| GOTERM_CC_DIRECT | GO:0034667~integrin alpha3-beta1 complex                   | 2   | 0.81300813  | 0.026382767 |
| GOTERM_CC_DIRECT | GO:0043202~lysosomal lumen                                 | 5   | 2.032520325 | 0.026616046 |
| GOTERM_CC_DIRECT | GO:0034707~chloride channel complex                        | 4   | 1.62601626  | 0.027222748 |
| GOTERM_CC_DIRECT | GO:0043235~receptor complex                                | 6   | 2.43902439  | 0.027305311 |
| GOTERM_CC_DIRECT | GO:0005911~cell-cell junction                              | 7   | 2.845528455 | 0.02748025  |
| GOTERM_CC_DIRECT | GO:0030496~midbody                                         | 6   | 2.43902439  | 0.028948171 |
| GOTERM_CC_DIRECT | GO:0015630~microtubule cytoskeleton                        | 6   | 2.43902439  | 0.03613784  |
| GOTERM_CC_DIRECT | GO:0031594~neuromuscular junction                          | 4   | 1.62601626  | 0.036600944 |
| GOTERM_CC_DIRECT | GO:0034666~integrin alpha2-beta1 complex                   | 2   | 0.81300813  | 0.039313036 |
| GOTERM_CC_DIRECT | GO:0097149~centralspindlin complex                         | 2   | 0.81300813  | 0.039313036 |
| GOTERM_CC_DIRECT | GO:0044393~microspike                                      | 2   | 0.81300813  | 0.039313036 |
| GOTERM_CC_DIRECT | GO:0019897~extrinsic component of plasma membrane          | 3   | 1.219512195 | 0.043116912 |
| GOTERM_CC_DIRECT | GO:0005623~cell                                            | 5   | 2.032520325 | 0.044303661 |
| GOTERM_CC_DIRECT | GO:0005903~brush border                                    | 4   | 1.62601626  | 0.045519089 |
| GOTERM_MF_DIRECT | GO:0005178~integrin binding                                | 19  | 7.723577236 | 5.89619E-15 |
| GOTERM_MF_DIRECT | GO:0005515~protein binding                                 | 175 | 71.13821138 | 5.26675E-12 |
| GOTERM_MF_DIRECT | GO:0005509~calcium ion binding                             | 34  | 13.82113821 | 1.6431E-09  |
| GOTERM_MF_DIRECT | GO:0002020~protease binding                                | 13  | 5.284552846 | 1.67672E-08 |
| GOTERM_MF_DIRECT | GO:0098641~cadherin binding involved in cell-cell adhesion | 20  | 8.130081301 | 2.70349E-08 |
| GOTERM_MF_DIRECT | GO:0043236~laminin binding                                 | 8   | 3.25203252  | 3.70454E-08 |
| GOTERM_MF_DIRECT | GO:0004222~metalloendopeptidase activity                   | 12  | 4.87804878  | 5.24682E-07 |
| GOTERM_MF_DIRECT | GO:0001968~fibronectin binding                             | 7   | 2.845528455 | 1.27624E-06 |
| GOTERM_MF_DIRECT | GO:0005518~collagen binding                                | 9   | 3.658536585 | 1.77251E-06 |
| GOTERM_MF_DIRECT | GO:0004252~serine-type endopeptidase activity              | 15  | 6.097560976 | 1.48661E-05 |
| GOTERM_MF_DIRECT | GO:0008201~heparin binding                                 | 12  | 4.87804878  | 1.57453E-05 |
| GOTERM_MF_DIRECT | GO:0001618~virus receptor activity                         | 8   | 3.25203252  | 5.41413E-05 |
| GOTERM_MF_DIRECT | GO:0008083~growth factor activity                          | 11  | 4.471544715 | 9.53695E-05 |
| GOTERM_MF_DIRECT | GO:0048306~calcium-dependent protein binding               | 7   | 2.845528455 | 0.000154472 |
| GOTERM_MF_DIRECT | GO:0050840~extracellular matrix binding                    | 5   | 2.032520325 | 0.00043709  |
| GOTERM_MF_DIRECT | GO:0003779~actin binding                                   | 13  | 5.284552846 | 0.000562345 |
| GOTERM_MF_DIRECT | GO:0044548~S100 protein binding                            | 4   | 1.62601626  | 0.00069563  |
| GOTERM_MF_DIRECT | GO:0005125~cytokine activity                               | 10  | 4.06504065  | 0.000842758 |
| GOTERM_MF_DIRECT | GO:0017147~Wnt-protein binding                             | 5   | 2.032520325 | 0.00087095  |
| GOTERM_MF_DIRECT | GO:0019834~phospholipase A2 inhibitor activity             | 3   | 1.219512195 | 0.001146305 |
| GOTERM_MF_DIRECT | GO:0004869~cysteine-type endopeptidase inhibitor activity  | 5   | 2.032520325 | 0.001242298 |
| GOTERM_MF_DIRECT | GO:0005201~extracellular matrix structural constituent     | 6   | 2.43902439  | 0.002443879 |

|                  |                                                                   |    |             |             |
|------------------|-------------------------------------------------------------------|----|-------------|-------------|
| GOTERM_MF_DIRECT | GO:0019901~protein kinase binding                                 | 14 | 5.691056911 | 0.002525723 |
| GOTERM_MF_DIRECT | GO:0005198~structural molecule activity                           | 11 | 4.471544715 | 0.002558838 |
| GOTERM_MF_DIRECT | GO:0042813~Wnt-activated receptor activity                        | 4  | 1.62601626  | 0.003413753 |
| GOTERM_MF_DIRECT | GO:0034235~GPI anchor binding                                     | 3  | 1.219512195 | 0.003902218 |
| GOTERM_MF_DIRECT | GO:0008009~chemokine activity                                     | 5  | 2.032520325 | 0.004821112 |
| GOTERM_MF_DIRECT | GO:0031995~insulin-like growth factor II binding                  | 3  | 1.219512195 | 0.005155141 |
| GOTERM_MF_DIRECT | GO:0019904~protein domain specific binding                        | 9  | 3.658536585 | 0.009032837 |
| GOTERM_MF_DIRECT | GO:0048407~platelet-derived growth factor binding                 | 3  | 1.219512195 | 0.009850168 |
| GOTERM_MF_DIRECT | GO:0004859~phospholipase inhibitor activity                       | 3  | 1.219512195 | 0.009850168 |
| GOTERM_MF_DIRECT | GO:0043394~proteoglycan binding                                   | 3  | 1.219512195 | 0.009850168 |
| GOTERM_MF_DIRECT | GO:0050839~cell adhesion molecule binding                         | 5  | 2.032520325 | 0.011029924 |
| GOTERM_MF_DIRECT | GO:0005102~receptor binding                                       | 12 | 4.87804878  | 0.011106598 |
| GOTERM_MF_DIRECT | GO:0031994~insulin-like growth factor I binding                   | 3  | 1.219512195 | 0.011712069 |
| GOTERM_MF_DIRECT | GO:0008191~metalloendopeptidase inhibitor activity                | 3  | 1.219512195 | 0.020528265 |
| GOTERM_MF_DIRECT | GO:0005520~insulin-like growth factor binding                     | 3  | 1.219512195 | 0.025699877 |
| GOTERM_MF_DIRECT | GO:0017124~SH3 domain binding                                     | 6  | 2.43902439  | 0.02588126  |
| GOTERM_MF_DIRECT | GO:0032403~protein complex binding                                | 8  | 3.25203252  | 0.026009562 |
| GOTERM_MF_DIRECT | GO:0008237~metallopeptidase activity                              | 5  | 2.032520325 | 0.026834811 |
| GOTERM_MF_DIRECT | GO:0042803~protein homodimerization activity                      | 18 | 7.317073171 | 0.027876714 |
| GOTERM_MF_DIRECT | GO:0042802~identical protein binding                              | 18 | 7.317073171 | 0.034191453 |
| GOTERM_MF_DIRECT | GO:0005254~chloride channel activity                              | 4  | 1.62601626  | 0.039720521 |
| GOTERM_MF_DIRECT | GO:0045296~cadherin binding                                       | 3  | 1.219512195 | 0.040608211 |
| GOTERM_MF_DIRECT | GO:0005540~hyaluronic acid binding                                | 3  | 1.219512195 | 0.040608211 |
| GOTERM_MF_DIRECT | GO:0005544~calcium-dependent phospholipid binding                 | 4  | 1.62601626  | 0.047469748 |
| KEGG_PATHWAY     | hsa04512:ECM-receptor interaction                                 | 14 | 5.691056911 | 5.85E-10    |
| KEGG_PATHWAY     | hsa05200:Pathways in cancer                                       | 24 | 9.756097561 | 2.26E-08    |
| KEGG_PATHWAY     | hsa05205:Proteoglycans in cancer                                  | 17 | 6.910569106 | 6.04E-08    |
| KEGG_PATHWAY     | hsa04510:Focal adhesion                                           | 16 | 6.504065041 | 0.000000556 |
| KEGG_PATHWAY     | hsa04151:PI3K-Akt signaling pathway                               | 18 | 7.317073171 | 0.0000201   |
| KEGG_PATHWAY     | hsa04670:Leukocyte transendothelial migration                     | 10 | 4.06504065  | 0.0000678   |
| KEGG_PATHWAY     | hsa05222:Small cell lung cancer                                   | 8  | 3.25203252  | 0.00033     |
| KEGG_PATHWAY     | hsa04060:Cytokine-cytokine receptor interaction                   | 12 | 4.87804878  | 0.001319575 |
| KEGG_PATHWAY     | hsa05219:Bladder cancer                                           | 5  | 2.032520325 | 0.003600229 |
| KEGG_PATHWAY     | hsa04066:HIF-1 signaling pathway                                  | 7  | 2.845528455 | 0.003676269 |
| KEGG_PATHWAY     | hsa05412:Arrhythmogenic right ventricular cardiomyopathy (ARVC)   | 6  | 2.43902439  | 0.003725881 |
| KEGG_PATHWAY     | hsa04810:Regulation of actin cytoskeleton                         | 10 | 4.06504065  | 0.005227546 |
| KEGG_PATHWAY     | hsa04015:Rap1 signaling pathway                                   | 10 | 4.06504065  | 0.005227546 |
| KEGG_PATHWAY     | hsa05146:Amoebiasis                                               | 7  | 2.845528455 | 0.00597232  |
| KEGG_PATHWAY     | hsa05144:Malaria                                                  | 5  | 2.032520325 | 0.006850932 |
| KEGG_PATHWAY     | hsa04611:Platelet activation                                      | 7  | 2.845528455 | 0.015499847 |
| KEGG_PATHWAY     | hsa05230:Central carbon metabolism in cancer                      | 5  | 2.032520325 | 0.017214857 |
| KEGG_PATHWAY     | hsa04115:p53 signaling pathway                                    | 5  | 2.032520325 | 0.020048517 |
| KEGG_PATHWAY     | hsa00010:Glycolysis / Gluconeogenesis                             | 5  | 2.032520325 | 0.020048517 |
| KEGG_PATHWAY     | hsa04550:Signaling pathways regulating pluripotency of stem cells | 7  | 2.845528455 | 0.021550131 |

|              |                                                  |   |             |             |
|--------------|--------------------------------------------------|---|-------------|-------------|
| KEGG_PATHWAY | hsa04610:Complement and coagulation cascades     | 5 | 2.032520325 | 0.022088473 |
| KEGG_PATHWAY | hsa04514:Cell adhesion molecules (CAMs)          | 7 | 2.845528455 | 0.022928144 |
| KEGG_PATHWAY | hsa04390:Hippo signaling pathway                 | 7 | 2.845528455 | 0.029864674 |
| KEGG_PATHWAY | hsa05202:Transcriptional misregulation in cancer | 7 | 2.845528455 | 0.045345963 |
| KEGG_PATHWAY | hsa04640:Hematopoietic cell lineage              | 5 | 2.032520325 | 0.046105277 |
| KEGG_PATHWAY | hsa04064:NF-kappa B signaling pathway            | 5 | 2.032520325 | 0.046105277 |
| KEGG_PATHWAY | hsa04360:Axon guidance                           | 6 | 2.43902439  | 0.04742403  |
| KEGG_PATHWAY | hsa05323:Rheumatoid arthritis                    | 5 | 2.032520325 | 0.047743658 |

---



**Table S5. Reasons for exclusion from the evaluation of prognostic factors and establishment of nomogram**

| Case ID      | Size | T  | N  | AJCC stage | Residual tumor | Surgical treatment | History of radiation therapy | History of targeted molecular therapy | Tobacco smoking history | Alcohol drinking history | History of chronic pancreatitis | History of diabetes |
|--------------|------|----|----|------------|----------------|--------------------|------------------------------|---------------------------------------|-------------------------|--------------------------|---------------------------------|---------------------|
| TCGA-IB-A7LX |      |    | NA |            |                |                    |                              |                                       |                         |                          |                                 |                     |
| TCGA-HZ-8637 |      |    |    |            |                |                    | NA                           |                                       | NA                      |                          | NA                              | NA                  |
| TCGA-HZ-A77P |      |    |    |            |                |                    | NA                           |                                       |                         |                          |                                 |                     |
| TCGA-XD-AAUI |      |    |    |            |                |                    |                              |                                       |                         |                          | NA                              |                     |
| TCGA-FB-A4P5 |      |    |    |            |                |                    | NA                           |                                       |                         |                          |                                 |                     |
| TCGA-IB-AAUT | NA   |    |    |            |                |                    |                              |                                       |                         |                          |                                 |                     |
| TCGA-IB-A5SS |      |    |    |            |                | NA                 |                              |                                       |                         |                          |                                 |                     |
| TCGA-PZ-A5RE |      |    |    |            | NA             |                    |                              |                                       |                         | NA                       |                                 | NA                  |
| TCGA-HZ-A4BK |      |    |    |            |                |                    | NA                           |                                       | NA                      |                          | NA                              | NA                  |
| TCGA-2J-AAB6 |      |    |    |            |                |                    |                              |                                       | NA                      |                          |                                 |                     |
| TCGA-OE-A75W |      |    |    |            |                |                    | NA                           |                                       |                         |                          |                                 |                     |
| TCGA-HZ-A49I |      |    |    |            |                |                    | NA                           |                                       | NA                      |                          | NA                              | NA                  |
| TCGA-HZ-8519 |      |    |    |            |                |                    | NA                           |                                       | NA                      |                          | NA                              | NA                  |
| TCGA-FB-A78T |      |    |    |            |                |                    | NA                           |                                       |                         |                          | NA                              |                     |
| TCGA-HZ-8002 |      |    |    |            |                |                    | NA                           |                                       | NA                      |                          | NA                              | NA                  |
| TCGA-3E-AAAZ |      |    |    |            | NA             |                    | NA                           |                                       | NA                      |                          | NA                              | NA                  |
| TCGA-HV-A5A4 | NA   |    |    |            | NA             |                    |                              |                                       |                         |                          |                                 |                     |
| TCGA-FB-A4P6 |      |    |    |            | NA             |                    |                              |                                       |                         |                          |                                 |                     |
| TCGA-IB-A5ST |      |    |    |            |                |                    | NA                           |                                       |                         |                          |                                 |                     |
| TCGA-HZ-7919 |      |    |    |            |                |                    | NA                           |                                       | NA                      |                          | NA                              | NA                  |
| TCGA-HZ-8003 |      |    |    |            |                |                    | NA                           |                                       | NA                      |                          | NA                              | NA                  |
| TCGA-HV-AA8V | NA   |    |    |            |                |                    |                              |                                       |                         |                          |                                 |                     |
| TCGA-HZ-8001 |      |    |    | NA         |                |                    | NA                           |                                       | NA                      |                          | NA                              | NA                  |
| TCGA-HZ-8317 |      |    |    |            |                |                    | NA                           |                                       |                         |                          | NA                              | NA                  |
| TCGA-2L-AAQL |      |    |    |            | NA             |                    |                              |                                       |                         |                          |                                 |                     |
| TCGA-Q3-A5QY |      |    |    |            |                |                    |                              | NA                                    |                         |                          |                                 |                     |
| TCGA-HZ-A49G |      |    |    |            |                |                    | NA                           |                                       |                         |                          | NA                              | NA                  |
| TCGA-HV-A5A5 | NA   |    |    |            | NA             |                    |                              |                                       |                         |                          |                                 |                     |
| TCGA-IB-A7M4 | NA   |    |    |            |                |                    |                              |                                       |                         |                          |                                 |                     |
| TCGA-2J-AABT |      |    |    |            |                |                    | NA                           |                                       |                         |                          |                                 |                     |
| TCGA-HZ-7926 |      |    |    |            | NA             |                    | NA                           |                                       | NA                      |                          | NA                              | NA                  |
| TCGA-2L-AAQI |      |    |    |            |                |                    |                              |                                       |                         |                          |                                 |                     |
| TCGA-FB-A545 | NA   |    |    |            | NA             |                    | NA                           |                                       |                         |                          | NA                              |                     |
| TCGA-2J-AABK |      |    |    |            |                |                    |                              |                                       | NA                      |                          |                                 |                     |
| TCGA-2J-AAB8 |      |    |    |            |                |                    | NA                           |                                       | NA                      |                          |                                 |                     |
| TCGA-HZ-A49H |      |    |    |            |                |                    | NA                           |                                       | NA                      |                          | NA                              | NA                  |
| TCGA-HZ-8315 |      |    |    |            |                |                    | NA                           |                                       | NA                      |                          | NA                              | NA                  |
| TCGA-HV-AA8X | NA   |    |    |            |                |                    |                              |                                       |                         |                          |                                 |                     |
| TCGA-HZ-A77O |      |    |    |            |                |                    | NA                           |                                       |                         |                          |                                 |                     |
| TCGA-HV-A7OL | NA   |    |    |            |                |                    |                              |                                       |                         |                          |                                 |                     |
| TCGA-IB-7888 |      |    |    |            |                |                    |                              |                                       | NA                      |                          |                                 |                     |
| TCGA-YH-A8SY |      |    |    | NA         | NA             |                    |                              |                                       |                         |                          |                                 |                     |
| TCGA-IB-7652 |      |    |    |            |                |                    |                              | NA                                    |                         |                          |                                 |                     |
| TCGA-HZ-7925 |      |    |    |            |                |                    | NA                           |                                       | NA                      |                          | NA                              | NA                  |
| TCGA-HV-A5A6 | NA   |    |    |            |                | NA                 |                              |                                       |                         | NA                       |                                 |                     |
| TCGA-Z5-AAPL | NA   |    |    |            |                | NA                 |                              |                                       | NA                      |                          | NA                              | NA                  |
| TCGA-US-A779 |      |    |    |            |                |                    | NA                           |                                       | NA                      |                          | NA                              | NA                  |
| TCGA-HZ-A4BH |      |    |    |            |                |                    | NA                           |                                       | NA                      |                          | NA                              | NA                  |
| TCGA-FB-AAPS |      |    |    |            |                |                    |                              |                                       | NA                      |                          |                                 |                     |
| TCGA-3A-A9I7 | NA   |    |    |            |                |                    |                              |                                       | NA                      |                          |                                 |                     |
| TCGA-IB-8126 |      |    |    |            |                |                    | NA                           |                                       |                         |                          |                                 |                     |
| TCGA-3A-A9I5 |      | NA | NA |            |                |                    |                              |                                       | NA                      |                          |                                 |                     |
| TCGA-3E-AAAY |      |    |    |            | NA             |                    |                              |                                       |                         |                          |                                 |                     |
| TCGA-FB-AAPY |      |    |    |            |                |                    |                              |                                       |                         |                          | NA                              |                     |
| TCGA-IB-8127 |      |    |    |            |                |                    |                              |                                       | NA                      |                          |                                 |                     |
| TCGA-IB-7645 |      |    |    |            |                |                    |                              |                                       | NA                      |                          |                                 |                     |
| TCGA-FB-A5VM |      |    |    |            |                |                    | NA                           |                                       |                         |                          |                                 |                     |
| TCGA-LB-A8F3 |      |    |    |            |                |                    | NA                           |                                       |                         |                          | NA                              |                     |
| TCGA-HV-A5A3 | NA   |    | NA |            | NA             |                    |                              |                                       | NA                      |                          |                                 |                     |
| TCGA-Q3-AA2A | NA   |    |    |            | NA             |                    |                              |                                       |                         |                          | NA                              |                     |
| TCGA-H6-A45N |      |    |    |            | NA             |                    | NA                           |                                       |                         |                          |                                 |                     |
| TCGA-HZ-A77Q |      |    |    |            |                |                    | NA                           |                                       |                         |                          |                                 |                     |
| TCGA-HZ-8005 |      |    |    |            |                |                    |                              |                                       | NA                      |                          | NA                              | NA                  |
| TCGA-2J-AABR |      |    |    |            |                |                    |                              |                                       | NA                      |                          |                                 |                     |

**Table S6. Gene set enrichment analyses between high and low risk group in TCGA PAAD dataset**

| Terms enriched in high risk group       |      |            |           |             |             |
|-----------------------------------------|------|------------|-----------|-------------|-------------|
| NAME                                    | SIZE | ES         | NES       | NOM p-val   | FDR q-val   |
| <b>C2 KEGG (19 terms)</b>               |      |            |           |             |             |
| KEGG_NUCLEOTIDE_EXCISION_REPAIR         | 44   | 0.7201397  | 2.0976436 | 0           | 0.014243265 |
| KEGG_DNA_REPLICATION                    | 36   | 0.76967376 | 1.9800676 | 0.001984127 | 0.032056652 |
| KEGG_CELL_CYCLE                         | 124  | 0.6190967  | 1.9787879 | 0.002061856 | 0.02192012  |
| KEGG_PENTOSE_PHOSPHATE_PATHWAY          | 26   | 0.6525248  | 1.9349254 | 0.004081633 | 0.031387735 |
| KEGG_HOMOLOGOUS_RECOMBINATION           | 28   | 0.6866101  | 1.8651135 | 0           | 0.05900724  |
| KEGG_P53_SIGNALING_PATHWAY              | 67   | 0.53078645 | 1.8600821 | 0           | 0.051003285 |
| KEGG_MISMATCH_REPAIR                    | 23   | 0.71814543 | 1.8482338 | 0.005988024 | 0.04848411  |
| KEGG_PROTEASOME                         | 44   | 0.72454447 | 1.8142364 | 0.001988072 | 0.057262708 |
| KEGG_PYRIMIDINE_METABOLISM              | 96   | 0.52235556 | 1.8008125 | 0.005952381 | 0.059701934 |
| KEGG_BASE_EXCISION_REPAIR               | 33   | 0.64210325 | 1.744873  | 0.002024292 | 0.09585684  |
| KEGG_SPLICEOSOME                        | 124  | 0.5726161  | 1.7331576 | 0.002004008 | 0.09630436  |
| KEGG_ONE_CARBON_POOL_BY_FOLATE          | 17   | 0.6265623  | 1.7208614 | 0.004166667 | 0.09855121  |
| KEGG_N_GLYCAN_BIOSYNTHESIS              | 46   | 0.5590183  | 1.7089907 | 0.012072435 | 0.10039359  |
| KEGG_HUNTINGTONS_DISEASE                | 172  | 0.4956008  | 1.6758672 | 0.038934425 | 0.12364742  |
| KEGG_AMINOACYL_TRNA_BIOSYNTHESIS        | 41   | 0.612716   | 1.6366665 | 0.016771488 | 0.15375604  |
| KEGG_RNA_POLYMERASE                     | 29   | 0.5731571  | 1.6191819 | 0.030425964 | 0.1654411   |
| KEGG_RNA_DEGRADATION                    | 57   | 0.54382604 | 1.6059408 | 0.024096385 | 0.17073308  |
| KEGG_OOCYTE_MEIOSIS                     | 111  | 0.45920682 | 1.5974178 | 0.025586354 | 0.17047107  |
| KEGG_ALZHEIMERS_DISEASE                 | 156  | 0.43739977 | 1.5367693 | 0.09306931  | 0.24166852  |
| <b>C5</b>                               |      |            |           |             |             |
| <b>Biological process (646 terms)</b>   |      |            |           |             |             |
| GO_CELL_CYCLE_G1_S_PHASE_TRANSITION     | 108  | 0.6594155  | 2.079041  | 0           | 0.17302747  |
| GO_MITOTIC_CYTOKINESIS                  | 31   | 0.77121973 | 2.0544686 | 0           | 0.12073248  |
| GO_METAPHASE_PLATE_CONGRESSION          | 40   | 0.7632659  | 2.0319428 | 0           | 0.112749554 |
| GO_CHROMOSOME_SEGREGATION               | 259  | 0.6232573  | 2.0318973 | 0           | 0.08456216  |
| GO_MITOTIC_SISTER_CHROMATID_SEGREGATION | 87   | 0.70989907 | 2.0139432 | 0           | 0.09089815  |
| GO_DNA_PACKAGING                        | 186  | 0.5678415  | 2.0118885 | 0           | 0.07762929  |
| GO_SISTER_CHROMATID_SEGREGATION         | 169  | 0.67860454 | 2.009597  | 0           | 0.068468295 |
| GO_NUCLEAR_CHROMOSOME_SEGREGATION       | 216  | 0.6231709  | 2.0071008 | 0           | 0.06222519  |
| GO_MITOTIC_NUCLEAR_DIVISION             | 349  | 0.61095    | 2.006609  | 0           | 0.05602736  |
| GO_MITOTIC_CELL_CYCLE                   | 738  | 0.59008014 | 2.003901  | 0           | 0.053431753 |
| GO_NEGATIVE_REGULATION_OF_CELL_DIVISION | 58   | 0.6338843  | 2.0016801 | 0.002066116 | 0.050330997 |
| GO_CELL_DIVISION                        | 449  | 0.57844305 | 2.0005815 | 0           | 0.046962485 |
| GO_POSITIVE_REGULATION_OF_CYTOKINESIS   | 35   | 0.6032073  | 1.9870645 | 0           | 0.053053077 |
| GO_CHROMOSOME_LOCALIZATION              | 59   | 0.6648509  | 1.9844478 | 0           | 0.05093084  |
| GO_ORGANELLE_FISSION                    | 471  | 0.561181   | 1.9843669 | 0           | 0.04763153  |
| GO_REGULATION_OF_CYTOKINESIS            | 63   | 0.5958506  | 1.9737135 | 0           | 0.05116467  |
| GO_CHROMOSOME_CONDENSATION              | 29   | 0.7009857  | 1.9726745 | 0           | 0.048777815 |

|                                                                                                        |      |            |           |             |             |
|--------------------------------------------------------------------------------------------------------|------|------------|-----------|-------------|-------------|
| GO_DNA_CONFORMATION_CHANGE                                                                             | 263  | 0.56042385 | 1.9689437 | 0.00204499  | 0.048354197 |
| GO_TELOMERE_ORGANIZATION                                                                               | 103  | 0.60528266 | 1.9628264 | 0.002096436 | 0.049389604 |
| GO_DNA_REPLICATION_INDEPENDENT_NUCLEOSOME_ORGANIZATION                                                 | 51   | 0.66559476 | 1.9589338 | 0           | 0.04963587  |
| GO_ATP_DEPENDENT_CHROMATIN_REMODELING                                                                  | 72   | 0.6025981  | 1.9567213 | 0           | 0.049041003 |
| GO_SISTER_CHROMATID_COHESION                                                                           | 107  | 0.68042785 | 1.9516385 | 0           | 0.05041581  |
| GO_HISTONE_EXCHANGE                                                                                    | 51   | 0.6394713  | 1.9339594 | 0           | 0.061044134 |
| GO_CELL_CYCLE_CHECKPOINT                                                                               | 185  | 0.5870263  | 1.9336329 | 0           | 0.05865187  |
| GO_ANAPHASE_PROMOTING_COMPLEX_DEPENDENT_CATABOLIC_PROCESS                                              | 76   | 0.7079842  | 1.9265618 | 0.002012072 | 0.06160793  |
| GO_CELL_CYCLE_PHASE_TRANSITION                                                                         | 249  | 0.5743212  | 1.924497  | 0           | 0.060587894 |
| GO_REGULATION_OF_NUCLEAR_DIVISION                                                                      | 159  | 0.53920203 | 1.9222364 | 0           | 0.060322974 |
| GO_POSITIVE_REGULATION_OF_LIGASE_ACTIVITY                                                              | 108  | 0.6125599  | 1.9175805 | 0.001956947 | 0.062291212 |
| GO_DNA_BIOSYNTHETIC_PROCESS                                                                            | 112  | 0.60502017 | 1.9162903 | 0           | 0.06116454  |
| GO_NUCLEOBASE_CONTAINING_SMALL_MOLECULE_INTERCONVERSION                                                | 21   | 0.71639425 | 1.9149318 | 0.002118644 | 0.06018737  |
| GO_DNA_RECOMBINATION                                                                                   | 199  | 0.57265526 | 1.9129227 | 0           | 0.059630796 |
| GO_DNA_REPAIR                                                                                          | 454  | 0.5581603  | 1.9126428 | 0           | 0.05802184  |
| GO_PROTEIN_DNA_COMPLEX_SUBUNIT_ORGANIZATION                                                            | 223  | 0.53689474 | 1.9116246 | 0           | 0.056921497 |
| GO_REGULATION_OF_INTRINSIC_APOPTOTIC_SIGNALING_PATHWAY_IN_RESPONSE_TO_DNA_DAMAGE_BY_P53_CLASS_MEDIATOR | 14   | 0.7134073  | 1.9109195 | 0           | 0.05590264  |
| GO_CHROMATIN_ASSEMBLY_OR_DISASSEMBLY                                                                   | 170  | 0.5439884  | 1.9093914 | 0           | 0.055217147 |
| GO_MITOTIC_CELL_CYCLE_CHECKPOINT                                                                       | 133  | 0.58693933 | 1.9079821 | 0.002028398 | 0.05436471  |
| GO_RECOMBINATIONAL_REPAIR                                                                              | 72   | 0.6230198  | 1.9062333 | 0           | 0.054252245 |
| GO_REGULATION_OF_CELL_DIVISION                                                                         | 265  | 0.49105945 | 1.9006313 | 0           | 0.056953292 |
| GO_CENTROMERE_COMPLEX_ASSEMBLY                                                                         | 46   | 0.6779127  | 1.8996428 | 0.002141328 | 0.056270037 |
| GO_MACROMOLECULAR_COMPLEX_DISASSEMBLY                                                                  | 180  | 0.56804246 | 1.8982546 | 0           | 0.055735156 |
| GO_DNA_STRAND_ELONGATION                                                                               | 30   | 0.754878   | 1.8978914 | 0.004081633 | 0.054624617 |
| GO_TRANSCRIPTION_COUPLED_NUCLEOTIDE_EXCISION_REPAIR                                                    | 72   | 0.6381792  | 1.8932533 | 0           | 0.056440137 |
| GO_DNA_STRAND_ELONGATION_INVOLVED_IN_DNA_REPLICATION                                                   | 25   | 0.772086   | 1.8922454 | 0.006048387 | 0.055737335 |
| GO_NEGATIVE_REGULATION_OF_MITOTIC_NUCLEAR_DIVISION                                                     | 32   | 0.67065674 | 1.8917006 | 0.006122449 | 0.054746598 |
| GO_NEGATIVE_REGULATION_OF_NUCLEAR_DIVISION                                                             | 44   | 0.6242278  | 1.8906703 | 0.002070393 | 0.054341964 |
| GO_CELL_CYCLE_PROCESS                                                                                  | 1031 | 0.5272319  | 1.8901148 | 0           | 0.05352587  |
| GO_CYTOSKELETON_DEPENDENT_CYTOKINESIS                                                                  | 39   | 0.67397314 | 1.8823988 | 0           | 0.057473022 |
| GO_DOUBLE_STRAND_BREAK_REPAIR                                                                          | 158  | 0.5644916  | 1.8800385 | 0           | 0.057996474 |
| GO_MITOTIC_RECOMBINATION                                                                               | 41   | 0.7160155  | 1.8800086 | 0.004106776 | 0.056845613 |
| GO_REGULATION_OF_MICROTUBULE_POLYMERIZATION_OR_DEPOLYMERIZATION                                        | 170  | 0.55327034 | 1.8796449 | 0           | 0.0559638   |
| GO_CELL_DIFFERENTIATION_INVOLVED_IN_EMBRYONIC_PLACENTA_DEVELOPMENT                                     | 25   | 0.6224229  | 1.8785065 | 0           | 0.055537615 |
| GO_DEOXYRIBONUCLEOTIDE_BIOSYNTHETIC_PROCESS                                                            | 12   | 0.7682248  | 1.8755125 | 0           | 0.056754433 |
| GO_REGULATION_OF_ATTACHMENT_OF_SPINDLE_MICROTUBULES_TO_KINETOCHORE                                     | 10   | 0.8647281  | 1.874774  | 0           | 0.056090236 |
| GO_POSTREPLICATION_REPAIR                                                                              | 51   | 0.6270003  | 1.8745784 | 0           | 0.055233143 |
| GO_REGULATION_OF_EXIT_FROM_MITOSIS                                                                     | 15   | 0.7092638  | 1.8734727 | 0.001984127 | 0.055012096 |
| GO_CELLULAR_PROTEIN_COMPLEX_DISASSEMBLY                                                                | 121  | 0.60866874 | 1.8680725 | 0.006024096 | 0.05695752  |
| GO_NEGATIVE_REGULATION_OF_PROTEIN_MODIFICATION_BY_SMALL_PROTEIN_CONJUGATION_OR_REMOVAL                 | 135  | 0.5763723  | 1.8665744 | 0.003984064 | 0.057070322 |
| GO_RETROGRADE_VESICLE_MEDIATED_TRANSPORT_GOLGI_TO_ER                                                   | 76   | 0.59436154 | 1.8658687 | 0.001926782 | 0.05659839  |
| GO_MITOTIC_SPINDLE_ORGANIZATION                                                                        | 67   | 0.6308847  | 1.8642325 | 0           | 0.056519132 |

|                                                                                                   |      |            |           |             |             |
|---------------------------------------------------------------------------------------------------|------|------------|-----------|-------------|-------------|
| GO_NUCLEOTIDE_EXCISION_REPAIR                                                                     | 111  | 0.6047418  | 1.8637582 | 0           | 0.055921607 |
| GO_REGULATION_OF_TRANSCRIPTION_INVOLVED_IN_G1_S_TRANSITION_OF_MITOTIC_CELL_CYCLE                  | 25   | 0.71017885 | 1.8603126 | 0           | 0.05764584  |
| GO_CELL_CYCLE                                                                                     | 1260 | 0.5062813  | 1.8590708 | 0.002024292 | 0.057687998 |
| GO_DNA_REPLICATION_INITIATION                                                                     | 29   | 0.7229915  | 1.8582195 | 0.012195122 | 0.057261914 |
| GO_REGULATION_OF_CHROMOSOME_SEGREGATION                                                           | 82   | 0.6246313  | 1.8563925 | 0.001988072 | 0.057641525 |
| GO_DNA_SYNTHESIS_INVOLVED_IN_DNA_REPAIR                                                           | 72   | 0.600466   | 1.8559506 | 0.00610998  | 0.056985766 |
| GO_GUANOSINE_CONTAINING_COMPOUND_BIOSYNTHETIC_PROCESS                                             | 14   | 0.72929907 | 1.8556812 | 0.006048387 | 0.056431606 |
| GO_DNA_DAMAGE_RESPONSE_DETECTION_OF_DNA_DAMAGE                                                    | 36   | 0.67355824 | 1.853649  | 0           | 0.057087526 |
| GO_DNA_REPLICATION                                                                                | 199  | 0.58835423 | 1.8531232 | 0.004032258 | 0.056539003 |
| GO_DNA_GEOMETRIC_CHANGE                                                                           | 79   | 0.64581376 | 1.8512492 | 0           | 0.056980796 |
| GO_REGULATION_OF_MITOTIC_CELL_CYCLE                                                               | 453  | 0.5071375  | 1.850487  | 0           | 0.05660831  |
| GO_REGULATION_OF_CENTROSOME_CYCLE                                                                 | 38   | 0.6647558  | 1.8489791 | 0.002028398 | 0.056536384 |
| GO_REGULATION_OF_LIGASE_ACTIVITY                                                                  | 128  | 0.57687914 | 1.8432896 | 0.002008032 | 0.059795626 |
| GO_REGULATION_OF_TRANSLATION_IN_RESPONSE_TO_STRESS                                                | 19   | 0.7035845  | 1.8424728 | 0           | 0.059348173 |
| GO_NUCLEOTIDE_PHOSPHORYLATION                                                                     | 57   | 0.5553161  | 1.842338  | 0.00631579  | 0.058638163 |
| GO_DNA_METABOLIC_PROCESS                                                                          | 717  | 0.5147718  | 1.8394678 | 0           | 0.059833974 |
| GO_DNA_INTEGRITY_CHECKPOINT                                                                       | 140  | 0.56185144 | 1.8364042 | 0.002020202 | 0.06106539  |
| GO_REGULATION_OF_PROTEIN_UBIQUITINATION_INVOLVED_IN_UBIQUITIN_DEPENDENT_PROTEIN_CATABOLIC_PROCESS | 102  | 0.59517676 | 1.8353814 | 0           | 0.060981054 |
| GO_CYTOKINESIS                                                                                    | 84   | 0.57650286 | 1.8325056 | 0.004166667 | 0.06209914  |
| GO_ADP_METABOLIC_PROCESS                                                                          | 45   | 0.5654191  | 1.8309293 | 0           | 0.062392663 |
| GO_NUCLEOSIDE_MONOPHOSPHATE_BIOSYNTHETIC_PROCESS                                                  | 79   | 0.5514237  | 1.830807  | 0.006134969 | 0.06177915  |
| GO_REGULATION_OF_CELL_CYCLE_PROCESS                                                               | 542  | 0.4906111  | 1.8300204 | 0           | 0.061481383 |
| GO_MITOTIC_DNA_INTEGRITY_CHECKPOINT                                                               | 96   | 0.57074857 | 1.8278122 | 0.00204918  | 0.062323567 |
| GO_CELL_SEPARATION_AFTER_CYTOKINESIS                                                              | 17   | 0.7482304  | 1.8264953 | 0           | 0.06255374  |
| GO_REGULATION_OF_CELL_CYCLE_PHASE_TRANSITION                                                      | 314  | 0.5196457  | 1.823072  | 0           | 0.064318925 |
| GO_DNA_DEPENDENT_DNA_REPLICATION                                                                  | 93   | 0.6308172  | 1.8222849 | 0.006185567 | 0.064130776 |
| GO_REGULATION_OF_SUBSTRATE_ADHESION_DEPENDENT_CELL_SPREADING                                      | 42   | 0.5442426  | 1.8202811 | 0           | 0.06478797  |
| GO_POSITIVE_REGULATION_OF_MITOTIC_NUCLEAR_DIVISION                                                | 50   | 0.53670204 | 1.8185797 | 0.002079002 | 0.065406114 |
| GO_MITOTIC_SPINDLE_ASSEMBLY                                                                       | 40   | 0.6259853  | 1.8131715 | 0.002040816 | 0.06872748  |
| GO_CELL_CYCLE_DNA_REPLICATION                                                                     | 11   | 0.8093078  | 1.8111064 | 0.00204918  | 0.06932733  |
| GO_ATTACHMENT_OF_SPINDLE_MICROTUBULES_TO_KINETOCHORE                                              | 14   | 0.7738783  | 1.8090951 | 0           | 0.07022309  |
| GO_TELOMERE_MAINTENANCE_VIA_RECOMBINATION                                                         | 32   | 0.71336704 | 1.8080405 | 0.012552301 | 0.07017772  |
| GO_RNA_CAPPING                                                                                    | 35   | 0.6500747  | 1.8052832 | 0.004048583 | 0.0715783   |
| GO_ATP_GENERATION_FROM_ADP                                                                        | 37   | 0.5888407  | 1.8035351 | 0.004385965 | 0.07209955  |
| GO_G1_DNA_DAMAGE_CHECKPOINT                                                                       | 70   | 0.56345177 | 1.8030847 | 0.001992032 | 0.071644515 |
| GO_REGULATION_OF_SISTER_CHROMATID_SEGREGATION                                                     | 65   | 0.6092445  | 1.802754  | 0.005952381 | 0.0711142   |
| GO_REGULATION_OF_PROTEIN_COMPLEX_DISASSEMBLY                                                      | 208  | 0.50912297 | 1.801465  | 0           | 0.07115715  |
| GO_REGULATION_OF_TRANSLATIONAL_INITIATION_IN_RESPONSE_TO_STRESS                                   | 13   | 0.7393982  | 1.8002415 | 0           | 0.07148471  |
| GO_REGULATION_OF_DNA_REPAIR                                                                       | 72   | 0.5643014  | 1.7994635 | 0.00203252  | 0.07127585  |
| GO_MULTI_ORGANISM_LOCALIZATION                                                                    | 66   | 0.60049486 | 1.7993892 | 0.001992032 | 0.07061423  |
| GO_PROTEIN_LOCALIZATION_TO_CHROMOSOME_CENTROMERIC_REGION                                          | 12   | 0.83075815 | 1.7988199 | 0           | 0.07028531  |
| GO_NEGATIVE_REGULATION_OF_MITOTIC_CELL_CYCLE                                                      | 188  | 0.52133536 | 1.7979151 | 0.00409836  | 0.070325114 |
| GO_KINETOCHORE_ORGANIZATION                                                                       | 11   | 0.80802447 | 1.7962064 | 0.002066116 | 0.07082972  |

|                                                                                           |     |            |           |             |             |
|-------------------------------------------------------------------------------------------|-----|------------|-----------|-------------|-------------|
| GO_MEIOTIC_CELL_CYCLE                                                                     | 176 | 0.4838582  | 1.7961382 | 0.002222222 | 0.0701811   |
| GO_NEGATIVE_REGULATION_OF_INTRINSIC_APOPTOTIC_SIGNALING_PATHWAY_IN_RESPONSE_TO_DNA_DAMAGE | 25  | 0.56131184 | 1.7943506 | 0.00203666  | 0.07084026  |
| GO_NEGATIVE_REGULATION_OF_CELL_CYCLE_PROCESS                                              | 206 | 0.50823057 | 1.7938737 | 0.004032258 | 0.070462845 |
| GO_TRANSLATIONAL_ELONGATION                                                               | 110 | 0.629715   | 1.7927814 | 0.016460905 | 0.070737235 |
| GO_REGULATION_OF_SPINDLE_ORGANIZATION                                                     | 19  | 0.7267397  | 1.7925236 | 0.002028398 | 0.07014979  |
| GO_NEGATIVE_REGULATION_OF_CELL_CYCLE_PHASE_TRANSITION                                     | 141 | 0.52799565 | 1.7925135 | 0.00407332  | 0.069550104 |
| GO_POSITIVE_REGULATION_OF_VIRAL_PROCESS                                                   | 86  | 0.548578   | 1.7916471 | 0.004024145 | 0.069623984 |
| GO_TRANSLATIONAL_TERMINATION                                                              | 92  | 0.66141635 | 1.7912972 | 0.012295082 | 0.069281995 |
| GO_REGULATION_OF_MICROTUBULE_BASED_PROCESS                                                | 232 | 0.5188817  | 1.7911026 | 0           | 0.068790466 |
| GO_DEOXYRIBONUCLEOTIDE_METABOLIC_PROCESS                                                  | 33  | 0.6126696  | 1.7908406 | 0.004246285 | 0.0683846   |
| GO_PURINE_DEOXYRIBONUCLEOTIDE_METABOLIC_PROCESS                                           | 14  | 0.69748753 | 1.7874415 | 0           | 0.070244305 |
| GO_MICROTUBULE_DEPOLYMERIZATION                                                           | 12  | 0.7090188  | 1.7863799 | 0.01417004  | 0.07037838  |
| GO_INTERSTRAND_CROSS_LINK_REPAIR                                                          | 43  | 0.6013596  | 1.7846135 | 0.002057613 | 0.070859075 |
| GO_CELLULAR_RESPONSE_TO_DNA_DAMAGE_STIMULUS                                               | 683 | 0.50166297 | 1.7844547 | 0.004032258 | 0.07030248  |
| GO_NEGATIVE_REGULATION_OF_PROTEIN_COMPLEX_DISASSEMBLY                                     | 163 | 0.5090511  | 1.7836775 | 0.002028398 | 0.070243925 |
| GO_VIRION_ASSEMBLY                                                                        | 36  | 0.6286639  | 1.7814549 | 0.002       | 0.07128069  |
| GO_REGULATION_OF_CELLULAR_AMINO_ACID_METABOLIC_PROCESS                                    | 66  | 0.5912529  | 1.7800603 | 0.008368201 | 0.07176949  |
| GO_MULTI_ORGANISM_ORGANELLE_ORGANIZATION                                                  | 23  | 0.68883085 | 1.7789183 | 0.001996008 | 0.07195913  |
| GO_TROPHOBLAST_GIANT_CELL_DIFFERENTIATION                                                 | 12  | 0.69022644 | 1.7769783 | 0.010799136 | 0.07286079  |
| GO_POSITIVE_REGULATION_OF_VIRAL_RELEASE_FROM_HOST_CELL                                    | 15  | 0.7426813  | 1.7744824 | 0.005758158 | 0.07419394  |
| GO_NEGATIVE_REGULATION_OF_CHROMOSOME_SEGREGATION                                          | 27  | 0.66377854 | 1.7719053 | 0.008032128 | 0.07558655  |
| GO_NUCLEAR_ENVELOPE_REASSEMBLY                                                            | 17  | 0.7206396  | 1.7717979 | 0           | 0.075102516 |
| GO_NEGATIVE_REGULATION_OF_PROTEIN_TYROSINE_KINASE_ACTIVITY                                | 20  | 0.64486015 | 1.7716019 | 0.001980198 | 0.07463592  |
| GO_DEOXYRIBONUCLEOSIDE_TRIPHOSPHATE_METABOLIC_PROCESS                                     | 16  | 0.69725454 | 1.768188  | 0.008333334 | 0.076560736 |
| GO_FOLIC_ACID_CONTAINING_COMPOUND_BIOSYNTHETIC_PROCESS                                    | 12  | 0.71220076 | 1.7679068 | 0.00409836  | 0.076205686 |
| GO_REGULATION_OF_EXOSOMAL_SECRETION                                                       | 17  | 0.6799501  | 1.767176  | 0.009940358 | 0.076118976 |
| GO_PROTEIN_LOCALIZATION_TO_CHROMOSOME                                                     | 42  | 0.6209102  | 1.7666308 | 0.012269938 | 0.075891905 |
| GO_CELL_CYCLE_G2_M_PHASE_TRANSITION                                                       | 135 | 0.539866   | 1.7662115 | 0.00204918  | 0.075547256 |
| GO_MITOCHONDRIAL_TRANSLATION                                                              | 105 | 0.6411833  | 1.7661473 | 0.018518519 | 0.0750145   |
| GO_PROTEASOMAL_PROTEIN_CATABOLIC_PROCESS                                                  | 267 | 0.5174959  | 1.7644219 | 0.004048583 | 0.07577184  |
| GO_POSITIVE_REGULATION_OF_MITOTIC_SISTER_CHROMATID_SEPARATION                             | 14  | 0.73466486 | 1.7625535 | 0.004024145 | 0.07654687  |
| GO_NIK_NF_KAPPAB_SIGNALING                                                                | 83  | 0.58414763 | 1.7624601 | 0.006134969 | 0.07605178  |
| GO_DNA_TEMPLATED_TRANSCRIPTION_ELONGATION                                                 | 92  | 0.57401276 | 1.7610134 | 0.002008032 | 0.07656615  |
| GO_G2_DNA_DAMAGE_CHECKPOINT                                                               | 33  | 0.6117437  | 1.7604189 | 0.002074689 | 0.07645226  |
| GO_NUCLEOTIDE_EXCISION_REPAIR_DNA_INCISION                                                | 39  | 0.616001   | 1.7570999 | 0.002040816 | 0.078350075 |
| GO_NON_RECOMBINATIONAL_REPAIR                                                             | 70  | 0.5445053  | 1.7564317 | 0.008350731 | 0.07827828  |
| GO_NUCLEOSIDE_SALVAGE                                                                     | 17  | 0.6594303  | 1.7537136 | 0.004140787 | 0.07985341  |
| GO_SIGNAL_TRANSDUCTION_IN_RESPONSE_TO_DNA_DAMAGE                                          | 93  | 0.52890885 | 1.7519087 | 0.001996008 | 0.080803335 |
| GO_MEIOTIC_CELL_CYCLE_PROCESS                                                             | 143 | 0.48117754 | 1.7515141 | 0.008849558 | 0.08058891  |
| GO_TRANSCRIPTION_ELONGATION_FROM_RNA_POLYMERASE_II_PROMOTER                               | 77  | 0.57432973 | 1.7462572 | 0           | 0.08439547  |
| GO_EXIT_FROM_MITOSIS                                                                      | 12  | 0.6857492  | 1.7448534 | 0.003960396 | 0.08524574  |
| GO_TELOMERE_CAPPING                                                                       | 29  | 0.5822982  | 1.7446738 | 0.021008404 | 0.084795065 |
| GO_APICAL_JUNCTION_ASSEMBLY                                                               | 39  | 0.5617546  | 1.7444959 | 0.008298756 | 0.08436369  |

|                                                                                        |     |            |           |             |             |
|----------------------------------------------------------------------------------------|-----|------------|-----------|-------------|-------------|
| GO_SPINDLE_CHECKPOINT                                                                  | 24  | 0.6894951  | 1.7430066 | 0.014583333 | 0.08512426  |
| GO_POSITIVE_REGULATION_OF_CELL_CYCLE_ARREST                                            | 82  | 0.5195382  | 1.7426795 | 0.00203252  | 0.08480592  |
| GO_PEPTIDYL_PROLINE_MODIFICATION                                                       | 53  | 0.50628847 | 1.742659  | 0.010869565 | 0.08426755  |
| GO_REGULATION_OF_INTRINSIC_APOPTOTIC_SIGNALING_PATHWAY_BY_P53_CLASS_MEDIATOR           | 22  | 0.57435966 | 1.7398579 | 0.009784736 | 0.08606029  |
| GO_MITOTIC_CHROMOSOME_CONDENSATION                                                     | 14  | 0.75140095 | 1.7383711 | 0.007889546 | 0.086522676 |
| GO_POSITIVE_REGULATION_OF_PROTEIN_MODIFICATION_BY_SMALL_PROTEIN_CONJUGATION_OR_REMOVAL | 192 | 0.50574815 | 1.7349168 | 0           | 0.08886197  |
| GO_POSITIVE_REGULATION_OF_CELL_CYCLE_PROCESS                                           | 240 | 0.45668328 | 1.7347728 | 0.004149378 | 0.08845597  |
| GO_DNA_REPLICATION_CHECKPOINT                                                          | 14  | 0.7143572  | 1.7333574 | 0.004166667 | 0.08910595  |
| GO_POSITIVE_REGULATION_OF_SUBSTRATE_ADHESION_DEPENDENT_CELL_SPREADING                  | 27  | 0.5420212  | 1.7315581 | 0.002262444 | 0.09013324  |
| GO_SPLICEOSOMAL_SNRNP_ASSEMBLY                                                         | 37  | 0.6423509  | 1.7309353 | 0.010121457 | 0.09010104  |
| GO_NEGATIVE_REGULATION_OF_SIGNAL_TRANSDUCTION_BY_P53_CLASS_MEDIATOR                    | 27  | 0.568996   | 1.7298098 | 0.011904762 | 0.09053733  |
| GO_NUCLEAR_ENVELOPE_ORGANIZATION                                                       | 77  | 0.58041215 | 1.7294037 | 0.004024145 | 0.09026247  |
| GO_NUCLEUS_ORGANIZATION                                                                | 131 | 0.5249544  | 1.7291876 | 0           | 0.08989718  |
| GO_PROTEIN_LOCALIZATION_TO_KINETOCHORE                                                 | 10  | 0.8234618  | 1.7276508 | 0.00203252  | 0.090741135 |
| GO_PURINE_NUCLEOSIDE_MONOPHOSPHATE_BIOSYNTHETIC_PROCESS                                | 58  | 0.54420274 | 1.7263952 | 0.016597511 | 0.09123835  |
| GO_NUCLEOBASE_METABOLIC_PROCESS                                                        | 38  | 0.5366523  | 1.7263659 | 0.008298756 | 0.09069273  |
| GO_CHROMOSOME_ORGANIZATION                                                             | 970 | 0.4727875  | 1.7259496 | 0.00814664  | 0.09049012  |
| GO_ESTABLISHMENT_OF_PROTEIN_LOCALIZATION_TO_ORGANELLE                                  | 353 | 0.50328386 | 1.7258406 | 0.020491803 | 0.09003132  |
| GO_POSITIVE_REGULATION_OF_TELOMERE_MAINTENANCE                                         | 46  | 0.59496236 | 1.72571   | 0.00408998  | 0.08962003  |
| GO_REGULATION_OF_CENTROSOME_DUPLICATION                                                | 31  | 0.6211932  | 1.7253408 | 0.002028398 | 0.089393295 |
| GO_GLYCOSYL_COMPOUND_BIOSYNTHETIC_PROCESS                                              | 113 | 0.48679727 | 1.7219335 | 0.004149378 | 0.09169525  |
| GO_MONOSACCHARIDE_BIOSYNTHETIC_PROCESS                                                 | 54  | 0.4940323  | 1.7170415 | 0.010845987 | 0.095835604 |
| GO_PYRIMIDINE_NUCLEOSIDE_BIOSYNTHETIC_PROCESS                                          | 29  | 0.57662636 | 1.7162814 | 0.008368201 | 0.095952    |
| GO_SIGNAL_TRANSDUCTION_BY_P53_CLASS_MEDIATOR                                           | 123 | 0.48191005 | 1.7117918 | 0.004032258 | 0.099519394 |
| GO_RIBONUCLEOSIDE_DIPHOSPHATE_METABOLIC_PROCESS                                        | 62  | 0.49100196 | 1.7112136 | 0.00617284  | 0.099623956 |
| GO_REGULATION_OF_DOUBLE_STRAND_BREAK_REPAIR                                            | 35  | 0.574451   | 1.710933  | 0.008247423 | 0.099326074 |
| GO_MEIOSIS_I                                                                           | 81  | 0.48167685 | 1.7104652 | 0.004750594 | 0.0991738   |
| GO_AMP_METABOLIC_PROCESS                                                               | 13  | 0.6802312  | 1.7096415 | 0.003968254 | 0.09943079  |
| GO_REGULATION_OF_TELOMERASE_RNA_LOCALIZATION_TO_CAJAL_BODY                             | 15  | 0.7894643  | 1.7080733 | 0.014227643 | 0.100377515 |
| GO_POSITIVE_REGULATION_OF_CELLULAR_PROTEIN_CATABOLIC_PROCESS                           | 189 | 0.48823372 | 1.7070585 | 0.008016032 | 0.100768484 |
| GO_TRANSLESION_SYNTHESIS                                                               | 39  | 0.5749676  | 1.7067393 | 0.002061856 | 0.10053349  |
| GO_NUCLEOTIDE_EXCISION_REPAIR_DNA_GAP_FILLING                                          | 24  | 0.64418495 | 1.7066292 | 0.010224949 | 0.10004112  |
| GO_REGULATION_OF_RESPONSE_TO_DNA_DAMAGE_STIMULUS                                       | 140 | 0.49218425 | 1.7065214 | 0.002053388 | 0.099613644 |
| GO_DNA_TEMPLATED_TRANSCRIPTION_TERMINATION                                             | 98  | 0.57550466 | 1.7051836 | 0.007920792 | 0.100293    |
| GO_AMIDE_BIOSYNTHETIC_PROCESS                                                          | 490 | 0.4984211  | 1.705073  | 0.033755273 | 0.09980847  |
| GO_REGULATION_OF_INTRINSIC_APOPTOTIC_SIGNALING_PATHWAY_IN_RESPONSE_TO_DNA_DAMAGE       | 32  | 0.51905906 | 1.7044178 | 0.006036217 | 0.09975252  |
| GO_REGULATION_OF_RNA_STABILITY                                                         | 137 | 0.5245605  | 1.7044063 | 0.008097166 | 0.09921055  |
| GO_MATURATION_OF_5_8S_RRNA                                                             | 28  | 0.665308   | 1.7020051 | 0.016563147 | 0.10082497  |
| GO_CELLULAR_COMPONENT_DISASSEMBLY                                                      | 499 | 0.4264399  | 1.7010064 | 0           | 0.10127034  |
| GO_NUCLEOSIDE_DIPHOSPHATE_METABOLIC_PROCESS                                            | 80  | 0.46829695 | 1.7008116 | 0.010309278 | 0.10089137  |
| GO_BASE_EXCISION_REPAIR                                                                | 39  | 0.5885106  | 1.7006632 | 0.014112903 | 0.10054234  |
| GO_NEGATIVE_REGULATION_OF_RESPONSE_TO_DNA_DAMAGE_STIMULUS                              | 49  | 0.52988714 | 1.7006015 | 0.008196721 | 0.10008834  |
| GO_PROTEIN_TARGETING_TO_MITOCHONDRION                                                  | 47  | 0.5936182  | 1.7004097 | 0.03869654  | 0.09972516  |

|                                                                                               |     |            |           |             |             |
|-----------------------------------------------------------------------------------------------|-----|------------|-----------|-------------|-------------|
| GO_SPINDLE_ASSEMBLY                                                                           | 69  | 0.5640803  | 1.6996964 | 0.010224949 | 0.099836    |
| GO_RRNA_3_END_PROCESSING                                                                      | 13  | 0.76342064 | 1.6992583 | 0.014644352 | 0.099616945 |
| GO_REGULATION_OF_ESTABLISHMENT_OF_PLANAR_POLARITY                                             | 110 | 0.501114   | 1.698461  | 0.016701462 | 0.09979157  |
| GO_PYRUVATE_METABOLIC_PROCESS                                                                 | 62  | 0.48094097 | 1.6975366 | 0           | 0.10015196  |
| GO_POSITIVE_REGULATION_OF_CHROMOSOME_SEGREGATION                                              | 25  | 0.6638723  | 1.6973723 | 0.012345679 | 0.099797376 |
| GO_NCRNA_METABOLIC_PROCESS                                                                    | 509 | 0.532935   | 1.6961759 | 0.034907598 | 0.10051061  |
| GO_REGULATION_OF_CELLULAR_AMINE_METABOLIC_PROCESS                                             | 88  | 0.4971241  | 1.6955172 | 0.016806724 | 0.100522935 |
| GO_PENTOSE_PHOSPHATE_SHUNT                                                                    | 12  | 0.69673735 | 1.6938003 | 0.009881423 | 0.10167802  |
| GO_NUCLEOTIDE_EXCISION_REPAIR_PREINCISION_COMPLEX_ASSEMBLY                                    | 29  | 0.6174684  | 1.6916432 | 0.003992016 | 0.10314338  |
| GO_AMINO_ACID_ACTIVATION                                                                      | 51  | 0.61593795 | 1.6914419 | 0.016632017 | 0.10283297  |
| GO_NUCLEOSIDE_MONOPHOSPHATE_METABOLIC_PROCESS                                                 | 232 | 0.4728614  | 1.6911051 | 0.031185031 | 0.102691725 |
| GO_REGULATION_OF_CELL_CYCLE_ARREST                                                            | 103 | 0.4763836  | 1.6910665 | 0.004008016 | 0.10220632  |
| GO_REGULATION_OF_DNA_TEMPLATED_TRANSCRIPTION_IN_RESPONSE_TO_STRESS                            | 67  | 0.4943058  | 1.6900123 | 0.016427105 | 0.102614716 |
| GO_POSITIVE_REGULATION_OF_GENE_EXPRESSION_EPIGENETIC                                          | 77  | 0.5043767  | 1.6896877 | 0.019480519 | 0.102489196 |
| GO_MONOSACCHARIDE_CATABOLIC_PROCESS                                                           | 57  | 0.49460027 | 1.6875899 | 0.009009009 | 0.1037311   |
| GO_NUCLEOBASE_BIOSYNTHETIC_PROCESS                                                            | 18  | 0.6439601  | 1.6863327 | 0.021097047 | 0.10433999  |
| GO_MATURATION_OF_SSU_RRNA                                                                     | 41  | 0.656936   | 1.6852481 | 0.027253669 | 0.10492139  |
| GO_MULTIVESICULAR_BODY_ORGANIZATION                                                           | 30  | 0.6336862  | 1.6851829 | 0.014056225 | 0.10445602  |
| GO_GLOBAL_GENOME_NUCLEOTIDE_EXCISION_REPAIR                                                   | 32  | 0.6082239  | 1.68373   | 0.008016032 | 0.10541214  |
| GO_BICELLULAR_TIGHT_JUNCTION_ASSEMBLY                                                         | 31  | 0.5562197  | 1.6834726 | 0.022774328 | 0.10513558  |
| GO_CELLULAR_MACROMOLECULAR_COMPLEX_ASSEMBLY                                                   | 687 | 0.44487453 | 1.682835  | 0.002083333 | 0.10522068  |
| GO_POSITIVE_REGULATION_OF_DNA_REPAIR                                                          | 37  | 0.5645221  | 1.6824293 | 0.012244898 | 0.10507682  |
| GO_REGULATION_OF_CELLULAR_PROTEIN_CATABOLIC_PROCESS                                           | 267 | 0.47290155 | 1.6824261 | 0.007984032 | 0.10458209  |
| GO_PROTEASOME_ASSEMBLY                                                                        | 14  | 0.72373945 | 1.6820838 | 0.015686275 | 0.10443988  |
| GO_BLASTOCYST_GROWTH                                                                          | 16  | 0.709049   | 1.6801829 | 0.012244898 | 0.10572605  |
| GO_ANTIGEN_PROCESSING_AND_PRESENTATION_OF_PEPTIDE_ANTIGEN_VIA_MHC_CLASS_I                     | 90  | 0.5393969  | 1.6791266 | 0.031380754 | 0.10627534  |
| GO_POSITIVE_REGULATION_OF_DNA_METABOLIC_PROCESS                                               | 182 | 0.45509538 | 1.6778299 | 0.008179959 | 0.10707712  |
| GO_NADH_METABOLIC_PROCESS                                                                     | 34  | 0.5654207  | 1.677182  | 0.02079002  | 0.107167825 |
| GO_RIBOSOME_BIOGENESIS                                                                        | 300 | 0.5818069  | 1.675016  | 0.055900622 | 0.10884301  |
| GO_RECIPROCAL_DNA_RECOMBINATION                                                               | 39  | 0.53736556 | 1.6745574 | 0.019823788 | 0.10875994  |
| GO_PURINE_NUCLEOBASE_BIOSYNTHETIC_PROCESS                                                     | 12  | 0.6861267  | 1.674366  | 0.02258727  | 0.10841905  |
| GO_RIBONUCLEOPROTEIN_COMPLEX_BIOGENESIS                                                       | 424 | 0.5539283  | 1.6738896 | 0.048780486 | 0.1083543   |
| GO_REGULATION_OF_SIGNAL_TRANSDUCTION_BY_P53_CLASS_MEDIATOR                                    | 160 | 0.49074864 | 1.6728058 | 0.008130081 | 0.10882209  |
| GO_REGULATION_OF_SPINDLE_ASSEMBLY                                                             | 14  | 0.7212587  | 1.6718248 | 0.003960396 | 0.109294064 |
| GO_PROTEIN_LOCALIZATION_TO_ORGANELLE                                                          | 538 | 0.46319988 | 1.6710272 | 0.00408998  | 0.10957328  |
| GO_ETHER_METABOLIC_PROCESS                                                                    | 12  | 0.6292144  | 1.6698705 | 0.018099548 | 0.11035504  |
| GO_MITOTIC_G2_M_TRANSITION_CHECKPOINT                                                         | 18  | 0.6400335  | 1.6696733 | 0.026970955 | 0.1100414   |
| GO_CHROMOSOME_ORGANIZATION_INVOLVED_IN_MEIOTIC_CELL_CYCLE                                     | 47  | 0.49190363 | 1.6691711 | 0.016470589 | 0.1100737   |
| GO_RRNA_METABOLIC_PROCESS                                                                     | 250 | 0.5796282  | 1.668882  | 0.062626265 | 0.10985583  |
| GO_PEPTIDE_METABOLIC_PROCESS                                                                  | 548 | 0.46339744 | 1.6677742 | 0.036796536 | 0.11044193  |
| GO_MISMATCH_REPAIR                                                                            | 27  | 0.6059561  | 1.6654557 | 0.016666668 | 0.11227384  |
| GO_PURINE_NUCLEOSIDE_BIOSYNTHETIC_PROCESS                                                     | 83  | 0.47392043 | 1.6642703 | 0.020876827 | 0.1130194   |
| GO_MATURATION_OF_5_8S_RRNA_FROM_TRICISTRONIC_RRNA_TRANSCRIPT_SSU_RRNA_5_8S_RRNA_L<br>SU_RRNA_ | 19  | 0.6925778  | 1.6642603 | 0.016666668 | 0.11255172  |

|                                                                                     |     |            |           |             |             |
|-------------------------------------------------------------------------------------|-----|------------|-----------|-------------|-------------|
| GO_PROTEIN_HETEROTETRAMERIZATION                                                    | 38  | 0.55923903 | 1.663671  | 0.03267974  | 0.11261031  |
| GO_DNA_LIGATION                                                                     | 16  | 0.6472004  | 1.6635885 | 0.012448133 | 0.11219521  |
| GO_GLUCCOSE_CATABOLIC_PROCESS                                                       | 28  | 0.5748583  | 1.6634889 | 0.025531914 | 0.11179181  |
| GO_NUCLEAR_TRANSCRIBED_MRNA_CATABOLIC_PROCESS_EXONUCLEOLYTIC                        | 30  | 0.6257131  | 1.663338  | 0.015936255 | 0.111445874 |
| GO_REGULATION_OF_CELL_CYCLE                                                         | 916 | 0.42964968 | 1.6619779 | 0.004140787 | 0.11218119  |
| GO_STRAND_DISPLACEMENT                                                              | 26  | 0.66460353 | 1.6617657 | 0.027659575 | 0.11195323  |
| GO_NEGATIVE_REGULATION_OF_INTRINSIC_APOPTOTIC_SIGNALING_PATHWAY_BY_P53_CLASS_MEDIAT | 18  | 0.5776873  | 1.660324  | 0.008064516 | 0.11282457  |
| OR                                                                                  |     |            |           |             |             |
| GO_MATURATION_OF_SSU_RRNA_FROM_TRICISTRONIC_RRNA_TRANSCRIPT_SSU_RRNA_5_8S_RRNA_L    | 33  | 0.6593365  | 1.6602219 | 0.027484143 | 0.1124324   |
| SU_RRNA_                                                                            |     |            |           |             |             |
| GO_REGULATION_OF_DOUBLE_STRAND_BREAK_REPAIR_VIA_HOMOLOGOUS_RECOMBINATION            | 16  | 0.62631017 | 1.6599126 | 0.012552301 | 0.112225205 |
| GO_NEGATIVE_REGULATION_OF_CYTOSKELETON_ORGANIZATION                                 | 212 | 0.45684937 | 1.659608  | 0.00621118  | 0.11206614  |
| GO_CYTOPLASMIC_TRANSLATION                                                          | 40  | 0.674575   | 1.6594002 | 0.05        | 0.11182244  |
| GO_NCRNA_PROCESSING                                                                 | 371 | 0.55377424 | 1.6589243 | 0.046121594 | 0.11179535  |
| GO_POSITIVE_REGULATION_OF_CELL_DIVISION                                             | 129 | 0.41216528 | 1.6579272 | 0.004464286 | 0.11228066  |
| GO_TRNA_METABOLIC_PROCESS                                                           | 168 | 0.5328607  | 1.6576976 | 0.04453441  | 0.11209809  |
| GO_GENE_SILENCING_BY_RNA                                                            | 132 | 0.4748704  | 1.6576579 | 0.012605042 | 0.11166818  |
| GO_MITOCHONDRION_ORGANIZATION                                                       | 554 | 0.45329762 | 1.6568488 | 0.030674847 | 0.11190521  |
| GO_REGULATION_OF_TRANSLATIONAL_FIDELITY                                             | 14  | 0.66256046 | 1.6560736 | 0.022222223 | 0.112191744 |
| GO_PROTEIN_SUMOYLATION                                                              | 114 | 0.53670955 | 1.6559697 | 0.020366598 | 0.11185084  |
| GO_PTERIDINE_CONTAINING_COMPOUND_BIOSYNTHETIC_PROCESS                               | 17  | 0.6455646  | 1.6542842 | 0.02244898  | 0.1129871   |
| GO_CENTROSOME_CYCLE                                                                 | 45  | 0.5848687  | 1.6542404 | 0.022044089 | 0.1125969   |
| GO_HEMIDESMOSOME_ASSEMBLY                                                           | 12  | 0.7616932  | 1.6532965 | 0.031380754 | 0.113046475 |
| GO_PROTEIN_FOLDING                                                                  | 213 | 0.45727825 | 1.6531543 | 0.0385439   | 0.1127647   |
| GO_POSITIVE_REGULATION_OF_TELOMERE_MAINTENANCE_VIA_TELOMERE_LENGTHENING             | 33  | 0.59140277 | 1.6509857 | 0.024242423 | 0.11453892  |
| GO_CYTOPLASMIC_SEQUESTERING_OF_PROTEIN                                              | 40  | 0.5050585  | 1.6493893 | 0.022633744 | 0.11540048  |
| GO_ANTIGEN_PROCESSING_AND_PRESENTATION_OF_EXOGENOUS_PEPTIDE_ANTIGEN_VIA_MHC_CLAS    | 65  | 0.58247536 | 1.6493425 | 0.037815128 | 0.114988394 |
| S_I                                                                                 |     |            |           |             |             |
| GO_INNER_CELL_MASS_CELL_PROLIFERATION                                               | 10  | 0.74379396 | 1.6480967 | 0.004056795 | 0.11565598  |
| GO_FORMATION_OF_TRANSLATION_PREINITIATION_COMPLEX                                   | 20  | 0.7011439  | 1.6479492 | 0.022540983 | 0.11534986  |
| GO_PROTEIN_NEDDYLATION                                                              | 13  | 0.66709745 | 1.6473082 | 0.021186441 | 0.11552463  |
| GO_REGULATION_OF_PROTEIN_MODIFICATION_BY_SMALL_PROTEIN_CONJUGATION_OR_REMOVAL       | 273 | 0.464782   | 1.6467485 | 0.00814664  | 0.11564379  |
| GO_REGULATION_OF_DNA_DAMAGE_RESPONSE_SIGNAL_TRANSDUCTION_BY_P53_CLASS_MEDIATOR      | 28  | 0.55277413 | 1.6463332 | 0.012711864 | 0.115595415 |
| GO_REGULATION_OF_VIRAL_RELEASE_FROM_HOST_CELL                                       | 31  | 0.59295875 | 1.6463189 | 0.013916501 | 0.115165494 |
| GO_REGULATION_BY_VIRUS_OF_VIRAL_PROTEIN_LEVELS_IN_HOST_CELL                         | 11  | 0.7313822  | 1.6461384 | 0.008179959 | 0.11488493  |
| GO_HISTONE_MRNA_METABOLIC_PROCESS                                                   | 28  | 0.6104358  | 1.6438702 | 0.020408163 | 0.1167043   |
| GO_PYRIMIDINE_CONTAINING_COMPOUND_BIOSYNTHETIC_PROCESS                              | 39  | 0.5239098  | 1.6433322 | 0.006651885 | 0.116701595 |
| GO_POSITIVE_REGULATION_OF_DNA_REPLICATION                                           | 86  | 0.46408218 | 1.6417035 | 0.012631579 | 0.117811665 |
| GO_REGULATION_OF_DNA_REPLICATION                                                    | 157 | 0.46481165 | 1.6413407 | 0.01446281  | 0.11775781  |
| GO_LAGGING_STRAND_ELONGATION                                                        | 11  | 0.7205379  | 1.6412145 | 0.018255578 | 0.117417365 |
| GO_EPIDERMIS_DEVELOPMENT                                                            | 251 | 0.40702897 | 1.6406761 | 0.011848342 | 0.11760686  |
| GO_NUCLEAR_TRANSCRIBED_MRNA_CATABOLIC_PROCESS_DEADENYLATION_DEPENDENT_DECAY         | 55  | 0.5646253  | 1.639923  | 0.008064516 | 0.11803533  |
| GO_RNA_PHOSPHODIESTER_BOND_HYDROLYSIS_EXONUCLEOLYTIC                                | 34  | 0.5772202  | 1.6398538 | 0.014       | 0.11765547  |
| GO_POSITIVE_REGULATION_OF_RESPONSE_TO_DNA_DAMAGE_STIMULUS                           | 62  | 0.5005591  | 1.6389098 | 0.008438818 | 0.11819216  |



|                                                                      |     |            |           |             |             |
|----------------------------------------------------------------------|-----|------------|-----------|-------------|-------------|
| GO_REGULATION_OF_PROTEIN_LOCALIZATION_TO_CHROMOSOME_TELOMERIC_REGION | 14  | 0.71783954 | 1.6386812 | 0.029239766 | 0.117948964 |
| GO_MITOCHONDRIAL_TRANSPORT                                           | 164 | 0.46030748 | 1.6375666 | 0.03469388  | 0.11859662  |
| GO_CHAPERONE_MEDIATED_PROTEIN_FOLDING                                | 46  | 0.5198293  | 1.6370066 | 0.036480688 | 0.118789576 |
| GO_NEGATIVE_REGULATION_OF_CELLULAR_PROTEIN_CATABOLIC_PROCESS         | 60  | 0.5202055  | 1.6367737 | 0.006276151 | 0.11858529  |
| GO_TRANSCRIPTION_FROM_RNA_POLYMERASE_I_PROMOTER                      | 35  | 0.5784832  | 1.6346914 | 0.016260162 | 0.120059446 |
| GO_DNA_REPLICATION_DEPENDENT_NUCLEOSOME_ORGANIZATION                 | 32  | 0.594156   | 1.6328253 | 0.05458515  | 0.121492095 |
| GO_TRANSLATIONAL_INITIATION                                          | 143 | 0.6316149  | 1.6323658 | 0.084886126 | 0.1215511   |
| GO_SPONGIOTROPHBLAST_LAYER_DEVELOPMENT                               | 13  | 0.6083587  | 1.632331  | 0.02826087  | 0.12114935  |
| GO_PROTEIN_LOCALIZATION_TO_CYTOSKELETON                              | 28  | 0.5787906  | 1.6322637 | 0.010204081 | 0.1207968   |
| GO_CLEAVAGE_INVOLVED_IN_RRNA_PROCESSING                              | 19  | 0.67891294 | 1.6319609 | 0.030737706 | 0.12066312  |
| GO_GENE_SILENCING                                                    | 198 | 0.4489919  | 1.6313207 | 0.014705882 | 0.120854415 |
| GO_FOLIC_ACID_METABOLIC_PROCESS                                      | 17  | 0.5700676  | 1.630616  | 0.02244898  | 0.121070765 |
| GO_HISTONE_PHOSPHORYLATION                                           | 25  | 0.59341866 | 1.6303482 | 0.013015185 | 0.120930165 |
| GO_ACTIVATION_OF_ANAPHASE_PROMOTING_COMPLEX_ACTIVITY                 | 14  | 0.66654783 | 1.6300902 | 0.022403259 | 0.12071544  |
| GO_POSITIVE_REGULATION_OF_CELL_CYCLE                                 | 321 | 0.4178142  | 1.6296318 | 0.00617284  | 0.120778345 |
| GO_MEIOTIC_CHROMOSOME_SEGREGATION                                    | 59  | 0.46690586 | 1.6283472 | 0.027149322 | 0.121669434 |
| GO_NEGATIVE_REGULATION_OF_ORGANELLE_ORGANIZATION                     | 373 | 0.43668905 | 1.6274787 | 0.008163265 | 0.122104004 |
| GO_NUCLEOTIDE_EXCISION_REPAIR_DNA_DAMAGE_RECOGNITION                 | 23  | 0.62186843 | 1.6274781 | 0.019880716 | 0.12168296  |
| GO_CENTRIOLE_ASSEMBLY                                                | 19  | 0.6235702  | 1.6272955 | 0.036885247 | 0.121420175 |
| GO_EPHRIN_RECEPTOR_SIGNALING_PATHWAY                                 | 84  | 0.46086365 | 1.6263669 | 0.019313306 | 0.12191179  |
| GO_DE_NOVO_PROTEIN_FOLDING                                           | 19  | 0.6387575  | 1.6258576 | 0.037190083 | 0.12205555  |
| GO_RESPONSE_TO_X_RAY                                                 | 30  | 0.55028033 | 1.6240091 | 0.012552301 | 0.12345899  |
| GO_PROTEIN_LOCALIZATION_TO_CHROMATIN                                 | 13  | 0.6629752  | 1.6239226 | 0.023762377 | 0.12314838  |
| GO_RNA_3_END_PROCESSING                                              | 96  | 0.5354875  | 1.6234496 | 0.025948104 | 0.12318276  |
| GO_NUCLEOSIDE_TRIPHOSPHATE_METABOLIC_PROCESS                         | 217 | 0.46043256 | 1.6225238 | 0.049792532 | 0.12376629  |
| GO_POSITIVE_REGULATION_OF_NUCLEAR_DIVISION                           | 61  | 0.4481835  | 1.622456  | 0.012793177 | 0.123424254 |
| GO_POSITIVE_REGULATION_OF_CANONICAL_WNT_SIGNALING_PATHWAY            | 117 | 0.45392507 | 1.6224071 | 0.014583333 | 0.12306769  |
| GO_REGULATION_OF_TELOMERE_MAINTENANCE                                | 65  | 0.54234195 | 1.620608  | 0.022357723 | 0.12441463  |
| GO_MEMBRANE_DISASSEMBLY                                              | 45  | 0.5983302  | 1.6203101 | 0.012145749 | 0.1242771   |
| GO_PYRIMIDINE_NUCLEOTIDE_BIOSYNTHETIC_PROCESS                        | 28  | 0.5435781  | 1.6186004 | 0.018907564 | 0.12564668  |
| GO_NEGATIVE_REGULATION_OF_RECEPTOR_MEDIATED_ENDOCYTOSIS              | 17  | 0.5736048  | 1.617386  | 0.017621145 | 0.12645203  |
| GO_FEMALE_MEIOTIC_DIVISION                                           | 24  | 0.5519421  | 1.6165161 | 0.021786492 | 0.12698773  |
| GO_ORGANONITROGEN_COMPOUND_BIOSYNTHETIC_PROCESS                      | 990 | 0.39255878 | 1.6154091 | 0.033826638 | 0.12777627  |
| GO_CHROMATIN_REMODELING                                              | 145 | 0.4551741  | 1.6117985 | 0.025210084 | 0.13104786  |
| GO_SOMATIC_DIVERSIFICATION_OF_IMMUNE_RECEPTORS_VIA_SOMATIC_MUTATION  | 12  | 0.66634965 | 1.611468  | 0.025052192 | 0.13099684  |
| GO_ENDOPLASMIC_RETICULUM_CALCIIUM_ION_HOMEOSTASIS                    | 20  | 0.5683146  | 1.6114258 | 0.03909465  | 0.13060898  |
| GO_REGULATION_OF_TELOMERE_MAINTENANCE_VIA_TELOMERE_LENGTHENING       | 49  | 0.5492812  | 1.6104445 | 0.027833002 | 0.13109685  |
| GO_VIRAL_LIFE_CYCLE                                                  | 283 | 0.47923476 | 1.6103368 | 0.05625     | 0.13078111  |
| GO_PURINE_NUCLEOBASE_METABOLIC_PROCESS                               | 20  | 0.5457782  | 1.6083285 | 0.034764826 | 0.1325733   |
| GO_CELLULAR_RESPONSE_TO_EXOGENOUS_DSRNA                              | 12  | 0.6279286  | 1.6082007 | 0.01898734  | 0.13228145  |
| GO_KERATINOCYTE_DIFFERENTIATION                                      | 100 | 0.46730345 | 1.6079144 | 0.040358745 | 0.13210614  |
| GO_RNA_PROCESSING                                                    | 804 | 0.4871173  | 1.6044775 | 0.037924152 | 0.13527974  |
| GO_PROTEIN_FOLDING_IN_ENDOPLASMIC_RETICULUM                          | 8   | 0.7624372  | 1.6040546 | 0.039130434 | 0.13528039  |
| GO_CHROMATIN_SILENCING_AT_RDNA                                       | 37  | 0.53959227 | 1.6036577 | 0.05869565  | 0.13528517  |

|                                                                                  |     |            |           |             |            |
|----------------------------------------------------------------------------------|-----|------------|-----------|-------------|------------|
| GO_REGULATION_OF_ESTABLISHMENT_OF_PROTEIN_LOCALIZATION_TO_CHROMOSOME             | 10  | 0.7669568  | 1.6025994 | 0.029296875 | 0.13602458 |
| GO_RIBOSOMAL_SMALL_SUBUNIT_BIOGENESIS                                            | 56  | 0.61942846 | 1.6018542 | 0.05376344  | 0.13634804 |
| GO_TRNA_TRANSPORT                                                                | 33  | 0.6363494  | 1.6008004 | 0.024340771 | 0.13708006 |
| GO_CYTOPLASMIC_TRANSLATIONAL_INITIATION                                          | 14  | 0.7204476  | 1.6001648 | 0.025157232 | 0.13722196 |
| GO_NEGATIVE_REGULATION_OF_SUBSTRATE_ADHESION_DEPENDENT_CELL_SPREADING            | 12  | 0.64454997 | 1.6001253 | 0.03846154  | 0.13684778 |
| GO_NEGATIVE_REGULATION_OF_BINDING                                                | 130 | 0.42551756 | 1.6000961 | 0.022727273 | 0.13645495 |
| GO_POSITIVE_REGULATION_OF_VIRAL_TRANSCRIPTION                                    | 35  | 0.5302324  | 1.5996712 | 0.02734375  | 0.13639127 |
| GO_NEGATIVE_REGULATION_OF_CELL_CYCLE_G1_S_PHASE_TRANSITION                       | 94  | 0.46996018 | 1.5983187 | 0.02414487  | 0.13745455 |
| GO_PROTEIN_TARGETING                                                             | 398 | 0.44846377 | 1.5976114 | 0.045360826 | 0.13782918 |
| GO_CHROMATIN_SILENCING                                                           | 89  | 0.46880132 | 1.5972772 | 0.042643923 | 0.13778754 |
| GO_REGULATION_OF_PROTEASOMAL_PROTEIN_CATABOLIC_PROCESS                           | 177 | 0.46515867 | 1.5959437 | 0.020242915 | 0.13883571 |
| GO_REGULATION_OF_MITOCHONDRIAL_OUTER_MEMBRANE_PERMEABILIZATION_INVOLVED_IN_APOPT | 42  | 0.50944906 | 1.5957978 | 0.029761905 | 0.13855402 |
| OTIC_SIGNALING_PATHWAY                                                           |     |            |           |             |            |
| GO_TERMINATION_OF_RNA_POLYMERASE_II_TRANSCRIPTION                                | 61  | 0.56394786 | 1.5956404 | 0.021956088 | 0.13827363 |
| GO_PROTEIN_LOCALIZATION_TO_MITOCHONDRION                                         | 65  | 0.5114081  | 1.5952528 | 0.052525252 | 0.13820371 |
| GO_TRNA_PROCESSING                                                               | 108 | 0.51782244 | 1.5951381 | 0.05894309  | 0.13789539 |
| GO_REGULATION_OF_ENDOPLASMIC_RETICULUM_UNFOLDED_PROTEIN_RESPONSE                 | 27  | 0.5559191  | 1.5937105 | 0.03125     | 0.13896428 |
| GO_POSITIVE_REGULATION_OF_PROTEIN_CATABOLIC_PROCESS                              | 258 | 0.4348542  | 1.5933176 | 0.016260162 | 0.13892047 |
| GO_PYRIMIDINE_NUCLEOTIDE_METABOLIC_PROCESS                                       | 43  | 0.5001171  | 1.5929148 | 0.03258656  | 0.13890141 |
| GO_ORGANELLE_INHERITANCE                                                         | 10  | 0.7226244  | 1.5925819 | 0.027613413 | 0.13885458 |
| GO_RNA_DEPENDENT_DNA_BIOSYNTHETIC_PROCESS                                        | 20  | 0.61242217 | 1.5921737 | 0.022821577 | 0.13886362 |
| GO_BLASTOCYST_DEVELOPMENT                                                        | 60  | 0.4743266  | 1.5919619 | 0.020618556 | 0.13867922 |
| GO_REGULATION_OF_MITOPHAGY                                                       | 42  | 0.51737005 | 1.5904069 | 0.017892644 | 0.1399737  |
| GO_REGULATION_OF_CELL_AGING                                                      | 33  | 0.5077976  | 1.5899751 | 0.029106028 | 0.14006491 |
| GO_HEPATOCYTE_APOPTOTIC_PROCESS                                                  | 13  | 0.6284453  | 1.5893102 | 0.025896415 | 0.14025025 |
| GO_RESPONSE_TO_GAMMA_RADIATION                                                   | 50  | 0.47149116 | 1.5890555 | 0.031380754 | 0.14007652 |
| GO_CELLULAR_RESPONSE_TO_GAMMA_RADIATION                                          | 19  | 0.5660698  | 1.5883001 | 0.030120483 | 0.14047687 |
| GO_CYTOKINETIC_PROCESS                                                           | 14  | 0.6248528  | 1.58805   | 0.016096579 | 0.14036182 |
| GO_NEGATIVE_REGULATION_OF_PROTEIN_BINDING                                        | 78  | 0.4521903  | 1.5868472 | 0.026748972 | 0.14122596 |
| GO_PROTEIN_DEPOLYMERIZATION                                                      | 24  | 0.5136619  | 1.5866829 | 0.022774328 | 0.14099534 |
| GO_NEGATIVE_REGULATION_OF_DNA_DAMAGE_RESPONSE_SIGNAL_TRANSDUCTION_BY_P53_CLASS_  | 13  | 0.622219   | 1.5866578 | 0.035416666 | 0.14062527 |
| MEDIATOR                                                                         |     |            |           |             |            |
| GO_NAD_METABOLIC_PROCESS                                                         | 50  | 0.47350103 | 1.5859405 | 0.03821656  | 0.14101388 |
| GO_REGULATION_OF_PROTEIN_PHOSPHATASE_TYPE_2A_ACTIVITY                            | 24  | 0.5866307  | 1.5857997 | 0.023904383 | 0.14074191 |
| GO_CELLULAR_AMIDE_METABOLIC_PROCESS                                              | 700 | 0.40960628 | 1.5854009 | 0.053418804 | 0.14071782 |
| GO_NUCLEOTIDE_EXCISION_REPAIR_DNA_DUPLEX_UNWINDING                               | 22  | 0.58831346 | 1.5849158 | 0.024048096 | 0.1408914  |
| GO_RNA_CATABOLIC_PROCESS                                                         | 220 | 0.5371845  | 1.5844659 | 0.07966457  | 0.14102334 |
| GO_VIRAL_LATENCY                                                                 | 11  | 0.62504584 | 1.5840694 | 0.033333335 | 0.14097312 |
| GO_REGULATION_OF_TRANSLATIONAL_INITIATION                                        | 80  | 0.506341   | 1.5838306 | 0.026262626 | 0.14081226 |
| GO_RNA_SURVEILLANCE                                                              | 13  | 0.692264   | 1.5836991 | 0.030800821 | 0.14057864 |
| GO_SNRNA_METABOLIC_PROCESS                                                       | 75  | 0.5207528  | 1.5828741 | 0.031128405 | 0.14098318 |
| GO_MULTI_ORGANISM_MEMBRANE_ORGANIZATION                                          | 30  | 0.5617273  | 1.5828017 | 0.03773585  | 0.14065894 |
| GO_ENDOSOME_ORGANIZATION                                                         | 59  | 0.5256305  | 1.5824311 | 0.04016064  | 0.1406737  |
| GO_POSITIVE_REGULATION_OF_MITOTIC_CELL_CYCLE                                     | 122 | 0.44230005 | 1.5811651 | 0.026748972 | 0.14158994 |

|                                                                                     |      |            |           |             |            |
|-------------------------------------------------------------------------------------|------|------------|-----------|-------------|------------|
| GO_REGULATION_OF_TRANSLATIONAL_ELONGATION                                           | 22   | 0.5712228  | 1.5802245 | 0.028397566 | 0.14221674 |
| GO_TELOMERE_MAINTENANCE_VIA_TELOMERASE                                              | 16   | 0.62255204 | 1.5768968 | 0.038306452 | 0.14551127 |
| GO_EMBRYONIC_PLACENTA_MORPHOGENESIS                                                 | 22   | 0.5112771  | 1.5762943 | 0.024948025 | 0.1457848  |
| GO_POSITIVE_REGULATION_OF_CELL_CYCLE_PHASE_TRANSITION                               | 67   | 0.49255556 | 1.5761569 | 0.027253669 | 0.1455381  |
| GO_MITOCHONDRION_MORPHOGENESIS                                                      | 19   | 0.5927601  | 1.5761557 | 0.04016064  | 0.14513718 |
| GO_NUCLEOSIDE_TRIPHOSPHATE_BIOSYNTHETIC_PROCESS                                     | 57   | 0.4899331  | 1.5761284 | 0.057082452 | 0.14475194 |
| GO_NUCLEAR_IMPORT                                                                   | 129  | 0.45581442 | 1.574707  | 0.022357723 | 0.14588198 |
| GO_PYRIMIDINE_NUCLEOSIDE_TRIPHOSPHATE_BIOSYNTHETIC_PROCESS                          | 17   | 0.58119744 | 1.5745853 | 0.031847134 | 0.14565429 |
| GO_RESPONSE_TO_INTERFERON_BETA                                                      | 22   | 0.5781779  | 1.574044  | 0.056338027 | 0.1458214  |
| GO_MICROTUBULE_ORGANIZING_CENTER_ORGANIZATION                                       | 82   | 0.5133101  | 1.5730438 | 0.028571429 | 0.14641729 |
| GO_PSEUDOURIDINE_SYNTHESIS                                                          | 17   | 0.6395971  | 1.5726429 | 0.04048583  | 0.14642988 |
| GO_EPIDERMAL_CELL_DIFFERENTIATION                                                   | 141  | 0.4144382  | 1.5724658 | 0.025581395 | 0.14619198 |
| GO_MEMBRANE_BUDDING                                                                 | 112  | 0.4724145  | 1.5715499 | 0.03992016  | 0.14678794 |
| GO_TELOMERE_MAINTENANCE_VIA_TELOMERE_LENGTHENING                                    | 25   | 0.57518685 | 1.5698383 | 0.036511157 | 0.14826018 |
| GO_ANTIGEN_PROCESSING_AND_PRESENTATION_OF_PEPTIDE_ANTIGEN                           | 172  | 0.45528126 | 1.569804  | 0.04526749  | 0.14790924 |
| GO_RNA_SPLICING_VIA_TRANSESTERIFICATION_REACTIONS                                   | 261  | 0.51012    | 1.5690255 | 0.030181086 | 0.14841086 |
| GO_RIBONUCLEOPROTEIN_COMPLEX_LOCALIZATION                                           | 116  | 0.52188843 | 1.5679911 | 0.04715128  | 0.14922139 |
| GO_ESTABLISHMENT_OR_MAINTENANCE_OF_BIPOLAR_CELL_POLARITY                            | 35   | 0.46850136 | 1.567368  | 0.026258206 | 0.14952666 |
| GO_POSITIVE_REGULATION_OF_MITOCHONDRIAL_OUTER_MEMBRANE_PERMEABILIZATION_INVOLVED_I  | 36   | 0.52516276 | 1.5652249 | 0.031936128 | 0.1515109  |
| N_APOPTOTIC_SIGNALING_PATHWAY                                                       |      |            |           |             |            |
| GO_NEGATIVE_REGULATION_OF_NECROTIC_CELL_DEATH                                       | 10   | 0.6354812  | 1.5651423 | 0.031512607 | 0.15120251 |
| GO_IMP_BIOSYNTHETIC_PROCESS                                                         | 11   | 0.6579039  | 1.5648502 | 0.043032788 | 0.15117213 |
| GO_MICROTUBULE_CYTOSKELETON_ORGANIZATION                                            | 324  | 0.43703225 | 1.564712  | 0.03131524  | 0.15096769 |
| GO_HEXOSE_CATABOLIC_PROCESS                                                         | 48   | 0.46404567 | 1.5639964 | 0.022371365 | 0.15133919 |
| GO_AEROBIC_RESPIRATION                                                              | 50   | 0.5302928  | 1.563956  | 0.07942974  | 0.15098658 |
| GO_MACROMOLECULE_CATABOLIC_PROCESS                                                  | 888  | 0.41344407 | 1.5636342 | 0.016494846 | 0.15096347 |
| GO_NEGATIVE_REGULATION_OF_CELL_CYCLE                                                | 413  | 0.4108412  | 1.56357   | 0.010224949 | 0.15064198 |
| GO_MITOCHONDRIAL_RESPIRATORY_CHAIN_COMPLEX_ASSEMBLY                                 | 63   | 0.5802417  | 1.5628382 | 0.104627766 | 0.15108581 |
| GO_CELLULAR_PROTEIN_COMPLEX_LOCALIZATION                                            | 22   | 0.5339042  | 1.5625414 | 0.025531914 | 0.15095669 |
| GO_EPITHELIAL_CELL_APOPTOTIC_PROCESS                                                | 25   | 0.5139568  | 1.5615313 | 0.018595042 | 0.15154304 |
| GO_PENTOSE_METABOLIC_PROCESS                                                        | 12   | 0.6390608  | 1.5604236 | 0.046875    | 0.15235753 |
| GO_PROTEIN_IMPORT_INTO_MITOCHONDRIAL_MATRIX                                         | 13   | 0.6604067  | 1.560142  | 0.062240664 | 0.15226544 |
| GO_MITOCHONDRIAL_MEMBRANE_ORGANIZATION                                              | 90   | 0.46126264 | 1.560042  | 0.04526749  | 0.15198179 |
| GO_NCRNA_3_END_PROCESSING                                                           | 20   | 0.6232819  | 1.5592606 | 0.06369427  | 0.15247053 |
| GO_GOLGI_LOCALIZATION                                                               | 11   | 0.64478964 | 1.5590006 | 0.044806518 | 0.15238899 |
| GO_CELLULAR_RESPONSE_TO_STRESS                                                      | 1505 | 0.39090124 | 1.5584394 | 0.012658228 | 0.15266372 |
| GO_MITOCHONDRIAL_ELECTRON_TRANSPORT_CYTOCHROME_C_TO_OXYGEN                          | 16   | 0.6677399  | 1.5579678 | 0.09445585  | 0.15278412 |
| GO_ERROR_PRONE_TRANSLESION_SYNTHESIS                                                | 19   | 0.61055756 | 1.5566612 | 0.034623217 | 0.15391776 |
| GO_REGULATION_OF_PROTEASOMAL_UBIQUITIN_DEPENDENT_PROTEIN_CATABOLIC_PROCESS          | 144  | 0.4616643  | 1.5556101 | 0.028282829 | 0.1547059  |
| GO_PYRIMIDINE_NUCLEOSIDE_TRIPHOSPHATE_METABOLIC_PROCESS                             | 19   | 0.5683157  | 1.5554326 | 0.047311828 | 0.15452549 |
| GO_TRNA_MODIFICATION                                                                | 55   | 0.53642595 | 1.5552013 | 0.070564516 | 0.15436977 |
| GO_CELLULAR_RESPONSE_TO_ARSENIC_CONTAINING_SUBSTANCE                                | 14   | 0.5889746  | 1.5545489 | 0.052192066 | 0.15467556 |
| GO_PROTEIN_UBIQUITINATION_INVOLVED_IN_UBIQUITIN_DEPENDENT_PROTEIN_CATABOLIC_PROCESS | 130  | 0.47086424 | 1.554432  | 0.032786883 | 0.15445262 |
| GO_PROTEIN_COMPLEX_SUBUNIT_ORGANIZATION                                             | 1472 | 0.3757891  | 1.5540224 | 0.013215859 | 0.15449212 |

|                                                                                               |     |            |           |             |            |
|-----------------------------------------------------------------------------------------------|-----|------------|-----------|-------------|------------|
| GO_REGULATION_OF_DNA_DEPENDENT_DNA_REPLICATION                                                | 40  | 0.5456863  | 1.5534828 | 0.051759835 | 0.15469943 |
| GO_PROTEIN_TRANSMEMBRANE_TRANSPORT                                                            | 50  | 0.48659703 | 1.5519848 | 0.06198347  | 0.1559742  |
| GO_RESPONSE_TO_UV                                                                             | 121 | 0.4420489  | 1.5516354 | 0.028169014 | 0.15596138 |
| GO_ER_NUCLEUS_SIGNALING_PATHWAY                                                               | 32  | 0.5530536  | 1.5516127 | 0.069767445 | 0.15560655 |
| GO_POSTTRANSCRIPTIONAL_REGULATION_OF_GENE_EXPRESSION                                          | 431 | 0.43722954 | 1.550897  | 0.027196653 | 0.1560048  |
| GO_CELL_AGING                                                                                 | 67  | 0.44464937 | 1.5501338 | 0.023255814 | 0.15646519 |
| GO_REGULATION_OF_PROTEIN_CATABOLIC_PROCESS                                                    | 383 | 0.40868995 | 1.549618  | 0.02385686  | 0.15668575 |
| GO_RETROGRADE_TRANSPORT_ENDOSOME_TO_PLASMA_MEMBRANE                                           | 14  | 0.6091372  | 1.5493841 | 0.02970297  | 0.1566431  |
| GO_REGULATION_OF_CELLULAR_RESPONSE_TO_HEAT                                                    | 74  | 0.52601004 | 1.5486622 | 0.04761905  | 0.15710159 |
| GO_OXIDATIVE_PHOSPHORYLATION                                                                  | 81  | 0.58444434 | 1.5473527 | 0.13253012  | 0.15830076 |
| GO_RIBONUCLEOPROTEIN_COMPLEX_SUBUNIT_ORGANIZATION                                             | 188 | 0.49146363 | 1.5466876 | 0.064       | 0.15863594 |
| GO_NEGATIVE_REGULATION_OF_CHROMOSOME_ORGANIZATION                                             | 94  | 0.48971176 | 1.5462658 | 0.058232933 | 0.158704   |
| GO_NEGATIVE_REGULATION_OF_MEGAKARYOCYTE_DIFFERENTIATION                                       | 18  | 0.5954302  | 1.5462632 | 0.06753813  | 0.15832974 |
| GO_INTERSPECIES_INTERACTION_BETWEEN_ORGANISMS                                                 | 646 | 0.42536652 | 1.5455391 | 0.021052632 | 0.15873803 |
| GO_CELLULAR_RESPIRATION                                                                       | 138 | 0.5058192  | 1.545427  | 0.10229645  | 0.1584965  |
| GO_MRNA_METABOLIC_PROCESS                                                                     | 590 | 0.47116327 | 1.5440335 | 0.0583501   | 0.15977114 |
| GO_CELLULAR_RESPONSE_TO_IONIZING_RADIATION                                                    | 50  | 0.48978946 | 1.5438718 | 0.05042017  | 0.1595537  |
| GO_REGULATION_OF_SISTER_CHROMATID_COHESION                                                    | 17  | 0.6117025  | 1.5435853 | 0.04233871  | 0.15950096 |
| GO_GLYCERALDEHYDE_3_PHOSPHATE_METABOLIC_PROCESS                                               | 17  | 0.5725192  | 1.5435529 | 0.049356222 | 0.15915067 |
| GO_NUCLEAR_PORE_ORGANIZATION                                                                  | 14  | 0.7047688  | 1.5428927 | 0.022357723 | 0.15952346 |
| GO_REGULATION_OF_CELL_CYCLE_G1_S_PHASE_TRANSITION                                             | 142 | 0.4407111  | 1.5422535 | 0.018480493 | 0.15994358 |
| GO_PYRIMIDINE_NUCLEOBASE_METABOLIC_PROCESS                                                    | 19  | 0.5484239  | 1.5415641 | 0.029288704 | 0.1602636  |
| GO_POSITIVE_REGULATION_OF_RELEASE_OF_CYTOCHROME_C_FROM_MITOCHONDRIA                           | 27  | 0.49841425 | 1.5395498 | 0.043568466 | 0.16220939 |
| GO_RESPONSE_TO_IONIZING_RADIATION                                                             | 139 | 0.43480495 | 1.5387628 | 0.035416666 | 0.16276686 |
| GO_CELLULAR_RESPONSE_TO_AMINO_ACID_STARVATION                                                 | 25  | 0.52588487 | 1.5368571 | 0.032719836 | 0.16464622 |
| GO_PROTEIN_POLYUBIQUITINATION                                                                 | 241 | 0.4554047  | 1.5351281 | 0.03        | 0.16622384 |
| GO_INTRINSIC_APOPTOTIC_SIGNALING_PATHWAY_IN_RESPONSE_TO_ENDOPLASMIC_RETICULUM_STRESS          | 31  | 0.49813926 | 1.5348908 | 0.04883227  | 0.16607612 |
| GO_REGULATION_OF_INTRINSIC_APOPTOTIC_SIGNALING_PATHWAY                                        | 139 | 0.39194217 | 1.5341789 | 0.024590164 | 0.16653709 |
| GO_INTRINSIC_APOPTOTIC_SIGNALING_PATHWAY_IN_RESPONSE_TO_DNA_DAMAGE_BY_P53_CLASS_MEDIATOR      | 29  | 0.5153681  | 1.5337777 | 0.0372807   | 0.16661108 |
| GO_REGULATION_OF_CENTRIOLE_REPLICATION                                                        | 13  | 0.6356969  | 1.533775  | 0.04225352  | 0.16623415 |
| GO_MUSCLE_CELL_MIGRATION                                                                      | 18  | 0.5630288  | 1.5336554 | 0.05970149  | 0.16599831 |
| GO_REGULATION_OF_FIBROBLAST_GROWTH_FACTOR_RECEPTOR_SIGNALING_PATHWAY                          | 25  | 0.4835207  | 1.5334377 | 0.059196617 | 0.16585717 |
| GO_POSITIVE_REGULATION_OF_TRANSCRIPTION_FROM_RNA_POLYMERASE_II_PROMOTER_IN_RESPONSE_TO_STRESS | 23  | 0.538537   | 1.5329794 | 0.07592191  | 0.16597195 |
| GO_MITOCHONDRIAL_RESPIRATORY_CHAIN_COMPLEX_I_BIOGENESIS                                       | 51  | 0.5931561  | 1.5315089 | 0.13017751  | 0.1673122  |
| GO_NEGATIVE_REGULATION_OF_DEFENSE_RESPONSE_TO_VIRUS                                           | 18  | 0.5742912  | 1.5313616 | 0.04742268  | 0.1671008  |
| GO_NEGATIVE_REGULATION_OF_RECEPTOR_BINDING                                                    | 12  | 0.5855992  | 1.5302474 | 0.06430155  | 0.16804732 |
| GO_HETEROCHROMATIN_ORGANIZATION                                                               | 11  | 0.59971744 | 1.5295434 | 0.064449064 | 0.16852069 |
| GO_MRNA_3_END_PROCESSING                                                                      | 71  | 0.5349652  | 1.5295151 | 0.04828974  | 0.16815786 |
| GO_MITOTIC_G2_DNA_DAMAGE_CHECKPOINT                                                           | 13  | 0.62313336 | 1.5286505 | 0.05353319  | 0.16874343 |
| GO_NEGATIVE_REGULATION_OF_DNA_REPAIR                                                          | 13  | 0.6194612  | 1.5284623 | 0.039175257 | 0.16858019 |
| GO_REGULATION_OF_CYCLIN_DEPENDENT_PROTEIN_KINASE_ACTIVITY                                     | 93  | 0.4231957  | 1.5284573 | 0.020920502 | 0.16821282 |

|                                                                               |      |            |           |             |            |
|-------------------------------------------------------------------------------|------|------------|-----------|-------------|------------|
| GO_POSITIVE_REGULATION_OF_PROTEOLYSIS                                         | 359  | 0.3930322  | 1.5283394 | 0.02834008  | 0.16795316 |
| GO_ESTABLISHMENT_OF_MITOTIC_SPINDLE_LOCALIZATION                              | 23   | 0.57097465 | 1.5270542 | 0.03805497  | 0.16902728 |
| GO_MULTI_ORGANISM_METABOLIC_PROCESS                                           | 137  | 0.5849009  | 1.5248636 | 0.13333334  | 0.17129175 |
| GO_ENDOPLASMIC_RETICULUM_ORGANIZATION                                         | 38   | 0.5100401  | 1.5235986 | 0.054435484 | 0.17244771 |
| GO_DNA_LIGATION_INVOLVED_IN_DNA_REPAIR                                        | 12   | 0.6199461  | 1.5219305 | 0.04158004  | 0.17403997 |
| GO_MAINTENANCE_OF_LOCATION_IN_CELL                                            | 94   | 0.41798985 | 1.5212244 | 0.038383838 | 0.17455986 |
| GO_OOCYTE_MATURATION                                                          | 18   | 0.5282279  | 1.5204601 | 0.044871796 | 0.17521882 |
| GO_NON_CANONICAL_WNT_SIGNALING_PATHWAY                                        | 136  | 0.4259627  | 1.5199434 | 0.039215688 | 0.17552137 |
| GO_PROTEIN_LOCALIZATION_TO_ENDOPLASMIC_RETICULUM                              | 123  | 0.5859238  | 1.5198927 | 0.1446541   | 0.17516784 |
| GO_NUCLEOSIDE_PHOSPHATE_BIOSYNTHETIC_PROCESS                                  | 176  | 0.3935531  | 1.5194492 | 0.033259425 | 0.17531246 |
| GO_NEGATIVE_REGULATION_OF KERATINOCYTE PROLIFERATION                          | 11   | 0.63567877 | 1.5194094 | 0.06889353  | 0.17498218 |
| GO_NUCLEAR_TRANSCRIBED_MRNA_CATABOLIC_PROCESS_NONSENSE_MEDIATED_DECAY         | 118  | 0.6110302  | 1.5186458 | 0.12394958  | 0.17551385 |
| GO_MITOCHONDRIAL_TRANSMEMBRANE_TRANSPORT                                      | 53   | 0.51150393 | 1.5181314 | 0.09090909  | 0.17582342 |
| GO_REGULATION_OF_NUCLEASE_ACTIVITY                                            | 23   | 0.5285359  | 1.5179935 | 0.055785123 | 0.17559029 |
| GO_NUCLEAR_TRANSCRIBED_MRNA_POLY_A_TAIL_SHORTENING                            | 24   | 0.59765035 | 1.5173901 | 0.042424243 | 0.1759111  |
| GO_RRNA_MODIFICATION                                                          | 26   | 0.5619706  | 1.515691  | 0.085020244 | 0.17768057 |
| GO_REGULATION_OF_CELL_CYCLE_G2_M_PHASE_TRANSITION                             | 58   | 0.47179985 | 1.5156221 | 0.047210302 | 0.1773969  |
| GO_CELL_ADHESION_MEDIATED_BY_INTEGRIN                                         | 12   | 0.6202394  | 1.515035  | 0.08387097  | 0.17766862 |
| GO_CENTROSOME_LOCALIZATION                                                    | 17   | 0.57272005 | 1.5141715 | 0.041753653 | 0.17831294 |
| GO_ESTABLISHMENT_OF_PROTEIN_LOCALIZATION_TO_CHROMOSOME                        | 12   | 0.645052   | 1.5135477 | 0.06483301  | 0.17864473 |
| GO_MACROMOLECULAR_COMPLEX_ASSEMBLY                                            | 1344 | 0.37074906 | 1.5134256 | 0.017167382 | 0.17841312 |
| GO_MATURATION_OF_LSU_RRNA                                                     | 13   | 0.6626204  | 1.513074  | 0.07660455  | 0.17846975 |
| GO_CELLULAR_RESPONSE_TO_INTERFERON_BETA                                       | 15   | 0.56751174 | 1.5128471 | 0.060728744 | 0.17838947 |
| GO_INTRA_S_DNA_DAMAGE_CHECKPOINT                                              | 12   | 0.6365468  | 1.5124797 | 0.0373444   | 0.17844746 |
| GO_NEGATIVE_REGULATION_OF_DNA_BINDING                                         | 46   | 0.43709004 | 1.512281  | 0.031982943 | 0.17833325 |
| GO_MOLTING_CYCLE                                                              | 82   | 0.39085853 | 1.510801  | 0.047727272 | 0.17973287 |
| GO_POSITIVE_REGULATION_OF_DNA_BIOSYNTHETIC_PROCESS                            | 58   | 0.46895972 | 1.5098438 | 0.05102041  | 0.180545   |
| GO_REGULATION_OF_DNA_METABOLIC_PROCESS                                        | 329  | 0.40646434 | 1.5085998 | 0.045738045 | 0.18170743 |
| GO_REGULATION_OF_CELLULAR_SENESCENCE                                          | 26   | 0.5117104  | 1.5085652 | 0.047311828 | 0.18136767 |
| GO_NUCLEIC_ACID_PHOSPHODIESTER_BOND_HYDROLYSIS                                | 237  | 0.4335418  | 1.5078535 | 0.06584362  | 0.18185654 |
| GO_REGULATION_OF_CHROMOSOME_ORGANIZATION                                      | 270  | 0.4302104  | 1.5078403 | 0.054766733 | 0.18148182 |
| GO_IMP_METABOLIC_PROCESS                                                      | 14   | 0.6106762  | 1.5074241 | 0.06584362  | 0.18160848 |
| GO_SEMAPHORIN_PLEXIN_SIGNALING_PATHWAY_INVOLVED_IN_NEURON_PROJECTION_GUIDANCE | 13   | 0.62460417 | 1.5070964 | 0.057494868 | 0.18161672 |
| GO_ERROR_FREE_TRANSLESION_SYNTHESIS                                           | 18   | 0.6109432  | 1.5069528 | 0.05338809  | 0.18140732 |
| GO_GLYCOSYL_COMPOUND_METABOLIC_PROCESS                                        | 355  | 0.37844005 | 1.5063379 | 0.06355932  | 0.18174796 |
| GO_SKIN_DEVELOPMENT                                                           | 209  | 0.37679955 | 1.5057054 | 0.04195804  | 0.18225016 |
| GO_NEGATIVE_REGULATION_OF_TUMOR_NECROSIS_FACTOR_MEDIATED_SIGNALING_PATHWAY    | 14   | 0.5270898  | 1.5054826 | 0.036247335 | 0.18214546 |
| GO_ESTABLISHMENT_OF_PROTEIN_LOCALIZATION_TO_ENDOPLASMIC_RETICULUM             | 104  | 0.62269175 | 1.503305  | 0.15843621  | 0.18454817 |
| GO_NEGATIVE_REGULATION_OF_GENE_EXPRESSION_EPIGENETIC                          | 106  | 0.43300185 | 1.5026797 | 0.060085837 | 0.18491058 |
| GO_POST_TRANSLATIONAL_PROTEIN_MODIFICATION                                    | 34   | 0.45841885 | 1.5026714 | 0.06638116  | 0.1845344  |
| GO_REGULATION_OF_PROTEIN_EXPORT_FROM_NUCLEUS                                  | 33   | 0.48168427 | 1.5022527 | 0.0546875   | 0.18459988 |
| GO_NCRNA_TRANSCRIPTION                                                        | 81   | 0.4867627  | 1.5022146 | 0.05367793  | 0.18425298 |
| GO_POSITIVE_REGULATION_OF_MULTI_ORGANISM_PROCESS                              | 151  | 0.39292046 | 1.5012039 | 0.029045643 | 0.18512414 |
| GO_NEGATIVE_REGULATION_OF_CANONICAL_WNT_SIGNALING_PATHWAY                     | 159  | 0.4011032  | 1.5000222 | 0.050438598 | 0.18608472 |

|                                                                              |     |            |           |             |            |
|------------------------------------------------------------------------------|-----|------------|-----------|-------------|------------|
| GO_REGULATION_OF_DNA_BINDING                                                 | 92  | 0.38619563 | 1.4980425 | 0.017699115 | 0.18819477 |
| GO_CELLULAR_RESPONSE_TO_UV                                                   | 65  | 0.44896537 | 1.4976366 | 0.04106776  | 0.1883516  |
| GO_RIBONUCLEOSIDE_TRIPHOSPHATE_BIOSYNTHETIC_PROCESS                          | 45  | 0.47853106 | 1.4973111 | 0.082474224 | 0.18828984 |
| GO_RNA_SPLICING_VIA_ENDONUCLEOLYTIC_CLEAVAGE_AND_LIGATION                    | 15  | 0.58370966 | 1.4968566 | 0.07883818  | 0.18848501 |
| GO_RRNA_CATABOLIC_PROCESS                                                    | 17  | 0.57743335 | 1.4950815 | 0.08835341  | 0.1902312  |
| GO_ALDITOL_METABOLIC_PROCESS                                                 | 20  | 0.5028575  | 1.4937595 | 0.057268724 | 0.19142371 |
| GO_RIBOSOMAL_LARGE_SUBUNIT_BIOGENESIS                                        | 48  | 0.5669852  | 1.4929674 | 0.15113872  | 0.19198897 |
| GO_ELECTRON_TRANSPORT_CHAIN                                                  | 92  | 0.53031886 | 1.4927338 | 0.14285715  | 0.19193782 |
| GO_CELL_SUBSTRATE_JUNCTION_ASSEMBLY                                          | 40  | 0.4952055  | 1.4926171 | 0.07048458  | 0.1917013  |
| GO_INNATE_IMMUNE_RESPONSE_ACTIVATING_CELL_SURFACE_RECEPTOR_SIGNALING_PATHWAY | 106 | 0.46091464 | 1.4920572 | 0.056565657 | 0.19205773 |
| GO_CELLULAR_SENESCENCE                                                       | 33  | 0.4568801  | 1.491538  | 0.0491453   | 0.1923158  |
| GO_REGULATION_OF_APOPTOTIC_SIGNALING_PATHWAY                                 | 354 | 0.36081424 | 1.4915352 | 0.028688524 | 0.19193213 |
| GO_NUCLEAR_PORE_COMPLEX_ASSEMBLY                                             | 10  | 0.70784354 | 1.4912796 | 0.04918033  | 0.1918406  |
| GO_KERATINIZATION                                                            | 50  | 0.52368057 | 1.4912466 | 0.0995671   | 0.19149546 |
| GO_REGULATION_OF_CHROMATIN_SILENCING                                         | 21  | 0.543905   | 1.4909911 | 0.09465021  | 0.19144797 |
| GO_LUNG_EPITHELIUM_DEVELOPMENT                                               | 34  | 0.4672559  | 1.4901252 | 0.057446808 | 0.1921905  |
| GO_MITOCHONDRIAL_RNA_PROCESSING                                              | 12  | 0.63876474 | 1.489744  | 0.07862903  | 0.19229023 |
| GO_MICROTUBULE_POLYMERIZATION_OR_DEPOLYMERIZATION                            | 40  | 0.4849424  | 1.4892792 | 0.06517312  | 0.19249447 |
| GO_SOMATIC_DIVERSIFICATION_OF_IMMUNOGLOBULINS                                | 26  | 0.54636294 | 1.48913   | 0.08649789  | 0.19230746 |
| GO_NEGATIVE_REGULATION_OF_ENDOPLASMIC_RETICULUM_UNFOLDED_PROTEIN_RESPONSE    | 10  | 0.6652538  | 1.4890409 | 0.05533597  | 0.19206189 |
| GO_PROTEIN_IMPORT                                                            | 153 | 0.41852522 | 1.488504  | 0.024948025 | 0.19233322 |
| GO_FOLIC_ACID_CONTAINING_COMPOUND_METABOLIC_PROCESS                          | 28  | 0.47451204 | 1.488491  | 0.06666667  | 0.19198042 |
| GO_RNA_SPLICING                                                              | 355 | 0.46885148 | 1.4876264 | 0.07692308  | 0.19274046 |
| GO_IRON_ION_IMPORT                                                           | 12  | 0.574514   | 1.4874718 | 0.059957173 | 0.19254595 |
| GO_REGULATION_OF_MEMBRANE_PERMEABILITY                                       | 69  | 0.44457835 | 1.4862523 | 0.06762295  | 0.19366565 |
| GO_REGULATION_OF_PROTEOLYSIS                                                 | 694 | 0.33735624 | 1.4858111 | 0.01746725  | 0.19388075 |
| GO_RNA_LOCALIZATION                                                          | 178 | 0.4730566  | 1.484771  | 0.067073174 | 0.19484966 |
| GO_HOMOLOGOUS_CHROMOSOME_SEGREGATION                                         | 43  | 0.4375008  | 1.4846144 | 0.062052507 | 0.1946737  |
| GO_RRNA_CONTAINING_RIBONUCLEOPROTEIN_COMPLEX_EXPORT_FROM_NUCLEUS             | 11  | 0.6575775  | 1.4842494 | 0.070393376 | 0.19474292 |
| GO_NEGATIVE_REGULATION_OF_WNT_SIGNALING_PATHWAY                              | 192 | 0.38099268 | 1.483885  | 0.051948052 | 0.19482088 |
| GO_RNA_PHOSPHODIESTER_BOND_HYDROLYSIS                                        | 110 | 0.44614342 | 1.4834741 | 0.083333336 | 0.19496189 |
| GO_EARLY_ENDOSOME_TO_GOLGI_TRANSPORT                                         | 11  | 0.62660444 | 1.4829842 | 0.06451613  | 0.1951682  |
| GO_SYNOPSIS                                                                  | 34  | 0.4589449  | 1.4824505 | 0.056650247 | 0.19535756 |
| GO_REGULATION_OF_GENE_EXPRESSION_EPIGENETIC                                  | 217 | 0.40698326 | 1.4811561 | 0.051172707 | 0.19654217 |
| GO_ESTABLISHMENT_OF_SPINDLE_ORIENTATION                                      | 25  | 0.5218277  | 1.4808928 | 0.05327869  | 0.19648266 |
| GO_PROTEIN_TETRAMERIZATION                                                   | 133 | 0.37001997 | 1.4806575 | 0.037647057 | 0.19641604 |
| GO_VENTRICULAR_SYSTEM_DEVELOPMENT                                            | 26  | 0.4945192  | 1.4800029 | 0.06852248  | 0.19683646 |
| GO_TETRAHYDROFOLATE_METABOLIC_PROCESS                                        | 20  | 0.5024933  | 1.4778327 | 0.08351178  | 0.1992829  |
| GO_REGULATION_OF_ORGAN_MORPHOGENESIS                                         | 241 | 0.36304462 | 1.4767836 | 0.044345897 | 0.20021512 |
| GO_INNER_MITOCHONDRIAL_MEMBRANE_ORGANIZATION                                 | 16  | 0.5830128  | 1.4756051 | 0.0951417   | 0.20122449 |
| GO_NEURON_APOPTOTIC_PROCESS                                                  | 34  | 0.4694683  | 1.4748383 | 0.057026476 | 0.20184852 |
| GO_PROTEIN_EXPORT_FROM_NUCLEUS                                               | 29  | 0.5255518  | 1.4739771 | 0.047325104 | 0.20260467 |
| GO_PROTEIN_HETEROOLIGOMERIZATION                                             | 112 | 0.3709261  | 1.4736912 | 0.038636364 | 0.2026625  |
| GO_POSITIVE_REGULATION_OF_TELOMERASE_ACTIVITY                                | 28  | 0.51299244 | 1.4733267 | 0.057142857 | 0.20273837 |

|                                                                                                                     |      |            |           |             |            |
|---------------------------------------------------------------------------------------------------------------------|------|------------|-----------|-------------|------------|
| GO_SINGLE_ORGANISM_MEMBRANE_BUDDING                                                                                 | 71   | 0.46066266 | 1.473266  | 0.08266129  | 0.20244548 |
| GO_NEGATIVE_REGULATION_OF_DNA_TEMPLATED_TRANSCRIPTION_ELONGATION                                                    | 10   | 0.61814266 | 1.4728879 | 0.0782241   | 0.2026123  |
| GO_PLACENTA_DEVELOPMENT                                                                                             | 136  | 0.3719189  | 1.472862  | 0.04077253  | 0.20226535 |
| GO_NUCLEOTIDE_EXCISION_REPAIR_PREINCISION_COMPLEX_STABILIZATION                                                     | 21   | 0.5603863  | 1.4720036 | 0.047034767 | 0.2030191  |
| GO_NUCLEAR_EXPORT                                                                                                   | 143  | 0.4790644  | 1.4716072 | 0.09218437  | 0.20314384 |
| GO_PROTEIN_CATABOLIC_PROCESS                                                                                        | 552  | 0.39969206 | 1.4711798 | 0.059917357 | 0.20330524 |
| GO_REGULATION_OF_IRE1_MEDIATED_UNFOLDED_PROTEIN_RESPONSE                                                            | 13   | 0.6109477  | 1.4710661 | 0.08436214  | 0.20307177 |
| GO_REGULATION_OF_RELEASE_OF_CYTOCHROME_C_FROM_MITOCHONDRIA                                                          | 43   | 0.44566274 | 1.4701965 | 0.07053942  | 0.20392127 |
| GO_RNA_MODIFICATION                                                                                                 | 112  | 0.46641412 | 1.468932  | 0.10887097  | 0.20522493 |
| GO_NEGATIVE_REGULATION_OF_INTRINSIC_APOPTOTIC_SIGNALING_PATHWAY                                                     | 84   | 0.3942602  | 1.4685829 | 0.04375     | 0.20535375 |
| GO_RNA_POLYADENYLATION                                                                                              | 29   | 0.54238045 | 1.4684963 | 0.070393376 | 0.20508876 |
| GO_SNRNA_PROCESSING                                                                                                 | 21   | 0.5797777  | 1.4679121 | 0.09147609  | 0.20549107 |
| GO_CELLULAR_RESPONSE_TO_RADIATION                                                                                   | 134  | 0.4012889  | 1.4676086 | 0.04680851  | 0.20551635 |
| GO_PYRIMIDINE_CONTAINING_COMPOUND_SALVAGE                                                                           | 12   | 0.5575156  | 1.4673659 | 0.06530612  | 0.20540048 |
| GO_REGULATION_OF_PROTEIN_INSERTION_INTO_MITOCHONDRIAL_MEMBRANE_INVOLVED_IN_APOPTOTIC_SIGNALING_PATHWAY              | 29   | 0.50916857 | 1.4651835 | 0.06122449  | 0.2079532  |
| GO_POSITIVE_REGULATION_OF_TRANSCRIPTION_FROM_RNA_POLYMERASE_II_PROMOTER_IN_RESPONSE_TO_ENDOPLASMIC_RETICULUM_STRESS | 12   | 0.5878166  | 1.4651124 | 0.085653104 | 0.20766713 |
| GO_OXIDOREDUCTION_COENZYME_METABOLIC_PROCESS                                                                        | 99   | 0.3975     | 1.4629766 | 0.06889353  | 0.21020266 |
| GO_UTP_METABOLIC_PROCESS                                                                                            | 10   | 0.57772774 | 1.4616547 | 0.06680162  | 0.21148053 |
| GO_TRNA_THREONYLCARBAMOYLADENOSINE_METABOLIC_PROCESS                                                                | 10   | 0.6488712  | 1.4593706 | 0.08179959  | 0.21417874 |
| GO_REGULATION_OF_CYSTEINE_TYPE_ENDOPEPTIDASE_ACTIVITY                                                               | 210  | 0.35909238 | 1.4585828 | 0.032608695 | 0.21483399 |
| GO_PROTEIN_COMPLEX_BIOGENESIS                                                                                       | 1090 | 0.34844548 | 1.4574643 | 0.01978022  | 0.2159715  |
| GO_ER_ASSOCIATED_UBIQUITIN_DEPENDENT_PROTEIN_CATABOLIC_PROCESS                                                      | 60   | 0.45484906 | 1.4571611 | 0.09330629  | 0.215973   |
| GO_INTRINSIC_APOPTOTIC_SIGNALING_PATHWAY                                                                            | 150  | 0.37742627 | 1.4571247 | 0.036511157 | 0.21563792 |
| GO_POSITIVE_REGULATION_OF_APOPTOTIC_SIGNALING_PATHWAY                                                               | 169  | 0.38517627 | 1.4571152 | 0.047717843 | 0.21525581 |
| GO_GLUCOSE_6_PHOSPHATE_METABOLIC_PROCESS                                                                            | 21   | 0.49969208 | 1.456996  | 0.075       | 0.21502712 |
| GO_NEGATIVE_REGULATION_OF_TELOMERE_MAINTENANCE_VIA_TELOMERASE                                                       | 11   | 0.6402931  | 1.4560418 | 0.07258064  | 0.21586408 |
| GO_RETROGRADE_PROTEIN_TRANSPORT_ER_TO_CYTOSOL                                                                       | 15   | 0.5572315  | 1.4559267 | 0.10663984  | 0.21563052 |
| GO_REGULATION_OF_UBIQUITIN_PROTEIN_LIGASE_ACTIVITY                                                                  | 17   | 0.5713142  | 1.4555545 | 0.059670784 | 0.21573532 |
| GO_NUCLEAR_TRANSPORT                                                                                                | 348  | 0.40952337 | 1.4550376 | 0.057142857 | 0.21605115 |
| GO_DNA_DEPENDENT_DNA_REPLICATION_MAINTENANCE_OF_FIDELITY                                                            | 21   | 0.5674606  | 1.4536737 | 0.09504132  | 0.21750094 |
| GO_DNA_DOUBLE_STRAND_BREAK_PROCESSING                                                                               | 20   | 0.5471035  | 1.4527555 | 0.08418891  | 0.21832769 |
| GO_NEGATIVE_REGULATION_OF_CELL_CYCLE_G2_M_PHASE_TRANSITION                                                          | 24   | 0.51811874 | 1.4516387 | 0.08074534  | 0.21944042 |
| GO_REGULATION_OF_CYTOSKELETON_ORGANIZATION                                                                          | 483  | 0.3616694  | 1.4514031 | 0.04192872  | 0.21938741 |
| GO_GUANOSINE_CONTAINING_COMPOUND_METABOLIC_PROCESS                                                                  | 44   | 0.42632088 | 1.4510466 | 0.058467742 | 0.219484   |
| GO_KERATAN_SULFATE_BIOSYNTHETIC_PROCESS                                                                             | 27   | 0.46947467 | 1.4504627 | 0.0824295   | 0.2198553  |
| GO_MULTIVESICULAR_BODY_SORTING_PATHWAY                                                                              | 12   | 0.60667384 | 1.4482514 | 0.08213552  | 0.22245868 |
| GO_TUMOR_NECROSIS_FACTOR_MEDIATED_SIGNALING_PATHWAY                                                                 | 117  | 0.41685018 | 1.4472725 | 0.09148936  | 0.22347729 |
| GO_CELLULAR_METABOLIC_COMPOUND_SALVAGE                                                                              | 37   | 0.45077518 | 1.4471354 | 0.075203255 | 0.22329395 |
| GO_NEGATIVE_REGULATION_OF_PEPTIDYL_TYROSINE_PHOSPHORYLATION                                                         | 38   | 0.43080264 | 1.4470136 | 0.056112226 | 0.22305422 |
| GO_CARBOHYDRATE_CATABOLIC_PROCESS                                                                                   | 109  | 0.37255985 | 1.4464288 | 0.04587156  | 0.22342595 |
| GO_PROTEIN_K63_LINKED_UBIQUITINATION                                                                                | 35   | 0.49382013 | 1.4460695 | 0.09406953  | 0.22357745 |
| GO_PTERIDINE_CONTAINING_COMPOUND_METABOLIC_PROCESS                                                                  | 35   | 0.44051778 | 1.4453897 | 0.087248325 | 0.22409159 |

|                                                                                               |      |            |           |             |            |
|-----------------------------------------------------------------------------------------------|------|------------|-----------|-------------|------------|
| GO_UV_PROTECTION                                                                              | 12   | 0.5691848  | 1.4438189 | 0.06458333  | 0.2257971  |
| GO_NEGATIVE_REGULATION_OF_CELLULAR_COMPONENT_ORGANIZATION                                     | 664  | 0.3575015  | 1.4437197 | 0.042918455 | 0.22553395 |
| GO_NEGATIVE_REGULATION_OF_HEMATOPOIETIC_PROGENITOR_CELL_DIFFERENTIATION                       | 24   | 0.5132615  | 1.4435034 | 0.10643016  | 0.22542474 |
| GO_RNA_SECONDARY_STRUCTURE_UNWINDING                                                          | 40   | 0.50787556 | 1.4423504 | 0.098121084 | 0.22657688 |
| GO_MICROTUBULE_BASED_PROCESS                                                                  | 486  | 0.38647392 | 1.4421577 | 0.067653276 | 0.22640604 |
| GO_POSITIVE_REGULATION_OF_WNT_SIGNALING_PATHWAY                                               | 150  | 0.38947695 | 1.4411331 | 0.07112971  | 0.22717477 |
| GO_GENERATION_OF_PRECURSOR_METABOLITES_AND_ENERGY                                             | 281  | 0.3831179  | 1.4404978 | 0.10537634  | 0.22795004 |
| GO_REGULATION_OF_TRANSCRIPTION_ELONGATION_FROM_RNA_POLYMERASE_II_PROMOTER                     | 21   | 0.5538261  | 1.4403216 | 0.07272727  | 0.2278075  |
| GO_REGULATION_OF_ORGANELLE_ORGANIZATION                                                       | 1131 | 0.36017844 | 1.4402056 | 0.05394191  | 0.22756171 |
| GO_NEURAL_TUBE_FORMATION                                                                      | 94   | 0.41673422 | 1.4397032 | 0.08955224  | 0.22786528 |
| GO_NEGATIVE_REGULATION_OF_PROTEIN_CATABOLIC_PROCESS                                           | 104  | 0.39640492 | 1.4392163 | 0.06854839  | 0.22813666 |
| GO_EMBRYONIC_PLACENTA_DEVELOPMENT                                                             | 83   | 0.39085948 | 1.43858   | 0.05764967  | 0.2286164  |
| GO_VENTRICULAR_CARDIAC_MUSCLE_CELL_DEVELOPMENT                                                | 13   | 0.50955546 | 1.4384964 | 0.07692308  | 0.22835054 |
| GO_PROTEIN_HYDROXYLATION                                                                      | 15   | 0.5507586  | 1.4380302 | 0.10262009  | 0.2285407  |
| GO_RESPONSE_TO_INTERFERON_ALPHA                                                               | 20   | 0.5538519  | 1.4379902 | 0.14107884  | 0.22818534 |
| GO_SNORNA_METABOLIC_PROCESS                                                                   | 11   | 0.62633044 | 1.4378388 | 0.10878661  | 0.2279992  |
| GO_REGULATION_OF_VIRAL_INDUCED_CYTOPLASMIC_PATTERN_RECOGNITION_RECEPTOR_SIGNALING_PATHWAY     | 15   | 0.53910124 | 1.4377257 | 0.09453782  | 0.22775784 |
| GO_PROTEIN_EXIT_FROM_ENDOPLASMIC_RETICULUM                                                    | 19   | 0.54391444 | 1.4375317 | 0.10973085  | 0.22761299 |
| GO_REGULATION_OF_TRANSCRIPTION_FROM_RNA_POLYMERASE_I_PROMOTER                                 | 23   | 0.5013259  | 1.4373362 | 0.085365854 | 0.22751053 |
| GO_RELEASE_OF_CYTOCHROME_C_FROM_MITOCHONDRIA                                                  | 22   | 0.4873981  | 1.437061  | 0.12896407  | 0.22747451 |
| GO_RESPONSE_TO_INCREASED_OXYGEN_LEVELS                                                        | 23   | 0.45457274 | 1.4367915 | 0.0809628   | 0.22747615 |
| GO_POSITIVE_REGULATION_OF_DNA_TEMPLATED_TRANSCRIPTION_ELONGATION                              | 22   | 0.5418124  | 1.4359347 | 0.086       | 0.22826068 |
| GO_REGULATION_OF_CYSTEINE_TYPE_ENDOPEPTIDASE_ACTIVITY_INVOLVED_IN_APOPTOTIC_SIGNALING_PATHWAY | 22   | 0.5082441  | 1.4350964 | 0.11089109  | 0.22899482 |
| GO_PHARYNGEAL_SYSTEM_DEVELOPMENT                                                              | 17   | 0.4973697  | 1.4350053 | 0.09799554  | 0.22875942 |
| GO_SPINDLE_LOCALIZATION                                                                       | 37   | 0.49652103 | 1.4341915 | 0.07484408  | 0.22948314 |
| GO_RESPONSE_TO_TYPE_I_INTERFERON                                                              | 67   | 0.4771617  | 1.4333689 | 0.14111043  | 0.23015103 |
| GO_POSITIVE_REGULATION_OF_EXTRINSIC_APOPTOTIC_SIGNALING_PATHWAY                               | 51   | 0.42312166 | 1.433278  | 0.07933194  | 0.22987813 |
| GO_IN_UTERO_EMBRYONIC_DEVELOPMENT                                                             | 307  | 0.36661145 | 1.4327234 | 0.06485356  | 0.23022531 |
| GO_PYRIMIDINE_NUCLEOSIDE_METABOLIC_PROCESS                                                    | 47   | 0.41960624 | 1.4321733 | 0.05172414  | 0.23053145 |
| GO_RESPONSE_TO_TOPOLOGICALLY_INCORRECT_PROTEIN                                                | 158  | 0.3997333  | 1.4309685 | 0.13502109  | 0.23181802 |
| GO_CARBOHYDRATE_BIOSYNTHETIC_PROCESS                                                          | 120  | 0.3617729  | 1.4309012 | 0.05032823  | 0.23152944 |
| GO_NUCLEOTIDE_SUGAR_METABOLIC_PROCESS                                                         | 33   | 0.4780291  | 1.4298053 | 0.116228074 | 0.23259605 |
| GO_POSITIVE_REGULATION_OF_TRANSCRIPTION_ELONGATION_FROM_RNA_POLYMERASE_II_PROMOTER            | 13   | 0.5997665  | 1.4280106 | 0.08678501  | 0.23462704 |
| R                                                                                             |      |            |           |             |            |
| GO_MITOCHONDRIAL_ELECTRON_TRANSPORT_UBIQUINOL_TO_CYTOCHROME_C                                 | 13   | 0.6326901  | 1.427622  | 0.14693877  | 0.2347817  |
| GO_POSITIVE_REGULATION_OF_LAMELLIPODIUM_ASSEMBLY                                              | 15   | 0.5307552  | 1.4276093 | 0.10548523  | 0.23441756 |
| GO_POSITIVE_REGULATION_OF_PROTEASOMAL_PROTEIN_CATABOLIC_PROCESS                               | 98   | 0.41793364 | 1.4266988 | 0.09475806  | 0.23531146 |
| GO_REGULATION_OF_SYMBIOSIS_ENCOMPASSING_MUTUALISM_THROUGH_PARASITISM                          | 197  | 0.3803984  | 1.4260347 | 0.07942974  | 0.23579445 |
| GO_NEGATIVE_REGULATION_OF_CYSTEINE_TYPE_ENDOPEPTIDASE_ACTIVITY                                | 87   | 0.36800772 | 1.4245623 | 0.05668934  | 0.23739609 |
| GO_CELLULAR_CARBOHYDRATE_METABOLIC_PROCESS                                                    | 136  | 0.36185429 | 1.4245013 | 0.057569295 | 0.23707862 |
| GO_GLYCOPROTEIN_CATABOLIC_PROCESS                                                             | 15   | 0.5134987  | 1.4240898 | 0.09151786  | 0.23729669 |
| GO_VESICLE_MEDIATED_TRANSPORT_BETWEEN_ENDOSOMAL_COMPARTMENTS                                  | 19   | 0.48755735 | 1.4238993 | 0.08074534  | 0.23717298 |



|                                                                         |     |            |           |             |             |
|-------------------------------------------------------------------------|-----|------------|-----------|-------------|-------------|
| GO_POSITIVE_REGULATION_OF_VIRAL_GENOME_REPLICATION                      | 30  | 0.48889267 | 1.4229779 | 0.107942976 | 0.23808959  |
| GO_PYRIMIDINE_DEOXYRIBONUCLEOTIDE_METABOLIC_PROCESS                     | 16  | 0.539462   | 1.4225523 | 0.09484536  | 0.23831993  |
| GO_DE_NOVO_POSTTRANSLATIONAL_PROTEIN_FOLDING                            | 14  | 0.59737015 | 1.422233  | 0.12288135  | 0.23835641  |
| GO_VESICLE_TARGETING                                                    | 76  | 0.44035625 | 1.4214916 | 0.0995935   | 0.23895232  |
| GO_RESPONSE_TO_COPPER_ION                                               | 27  | 0.42024258 | 1.4207448 | 0.06966292  | 0.23958413  |
| GO_ORGAN_REGENERATION                                                   | 82  | 0.3648199  | 1.4196901 | 0.06222224  | 0.24064414  |
| GO_XENOPHAGY                                                            | 102 | 0.36214796 | 1.4183961 | 0.049327355 | 0.24206313  |
| GO_CELL_JUNCTION_ASSEMBLY                                               | 127 | 0.4021139  | 1.4183797 | 0.10089686  | 0.24169518  |
| GO_ESTABLISHMENT_OR_MAINTENANCE_OF_MONOPOLAR_CELL_POLARITY              | 14  | 0.5201075  | 1.4183027 | 0.09110629  | 0.24141425  |
| GO_RIBOSOME_ASSEMBLY                                                    | 51  | 0.5295766  | 1.418097  | 0.17547569  | 0.24131612  |
| GO_CYTOPLASMIC_PATTERN_RECOGNITION_RECEPTOR_SIGNALING_PATHWAY           | 32  | 0.49847338 | 1.4180194 | 0.108606555 | 0.2410393   |
| GO_ANTIGEN_PROCESSING_AND_PRESENTATION                                  | 208 | 0.39964935 | 1.4174423 | 0.12215321  | 0.2414706   |
| GO_NEGATIVE_REGULATION_OF_TRANSFERASE_ACTIVITY                          | 344 | 0.35006714 | 1.4170276 | 0.049484536 | 0.2416179   |
| GO_POSITIVE_REGULATION_OF_CHROMOSOME_ORGANIZATION                       | 146 | 0.41882142 | 1.4169807 | 0.10483871  | 0.24130231  |
| GO_ESTABLISHMENT_OF_PROTEIN_LOCALIZATION_TO_MEMBRANE                    | 262 | 0.4132945  | 1.4163158 | 0.14437367  | 0.24186458  |
| GO_REGULATION_OF_MEIOTIC_CELL_CYCLE                                     | 40  | 0.38980982 | 1.415836  | 0.073913045 | 0.24209775  |
| GO_ENERGY_DERIVATION_BY_OXIDATION_OF_ORGANIC_COMPOUNDS                  | 209 | 0.40071943 | 1.4155234 | 0.1368421   | 0.24216908  |
| GO_REGULATION_OF_LAMELLIPODIUM_ASSEMBLY                                 | 25  | 0.47570863 | 1.4149483 | 0.08955224  | 0.24251461  |
| GO_CELLULAR_CARBOHYDRATE_BIOSYNTHETIC_PROCESS                           | 50  | 0.4084888  | 1.4149425 | 0.06320542  | 0.24214344  |
| GO_NEGATIVE_REGULATION_OF_DNA_REPLICATION                               | 54  | 0.44962394 | 1.4137537 | 0.11632653  | 0.24332906  |
| GO_FC_EPSILON_RECEPTOR_SIGNALING_PATHWAY                                | 124 | 0.43849242 | 1.4136603 | 0.11155379  | 0.24310654  |
| GO_REGULATION_OF_CANONICAL_WNT_SIGNALING_PATHWAY                        | 231 | 0.35564774 | 1.412885  | 0.06113537  | 0.24383551  |
| GO_SOMATIC_RECOMBINATION_OF_IMMUNOGLOBULIN_GENE_SEGMENTS                | 21  | 0.5353969  | 1.4124781 | 0.11578947  | 0.24400632  |
| GO_CELLULAR_PROTEIN_COMPLEX_ASSEMBLY                                    | 322 | 0.36791855 | 1.4111583 | 0.064935066 | 0.24545921  |
| GO_CELLULAR_MODIFIED_AMINO_ACID_BIOSYNTHETIC_PROCESS                    | 51  | 0.3933611  | 1.4106404 | 0.09544469  | 0.24579279  |
| GO_NUCLEOBASE_CONTAINING_COMPOUND_TRANSPORT                             | 192 | 0.42502254 | 1.4099041 | 0.126294    | 0.24653637  |
| GO_REGULATION_OF_MITOCHONDRION_ORGANIZATION                             | 205 | 0.36713192 | 1.4093359 | 0.07515658  | 0.24690057  |
| GO_INTRACELLULAR_PROTEIN_TRANSPORT                                      | 760 | 0.37135062 | 1.4093143 | 0.07157464  | 0.24653347  |
| GO_MAINTENANCE_OF_PROTEIN_LOCALIZATION_IN_ORGANELLE                     | 29  | 0.45176756 | 1.4092094 | 0.093495935 | 0.24628109  |
| GO_REGULATION_OF_OLIGODENDROCYTE_DIFFERENTIATION                        | 28  | 0.42844018 | 1.4091908 | 0.08908686  | 0.24591477  |
| GO_MITOCHONDRIAL_RNA_METABOLIC_PROCESS                                  | 24  | 0.553498   | 1.4091585 | 0.13195877  | 0.24558549  |
| GO_REGULATION_OF_GENE_SILENCING                                         | 51  | 0.43264243 | 1.408258  | 0.10606061  | 0.24644935  |
| GO_NEGATIVE_REGULATION_OF_TELOMERE_MAINTENANCE_VIA_TELOMERE_LENGTHENING | 16  | 0.5693925  | 1.4056624 | 0.115234375 | 0.24963623  |
| <b>Cellular component (203 terms)</b>                                   |     |            |           |             |             |
| GO_SPINDLE_MIDZONE                                                      | 26  | 0.84104335 | 2.3260758 | 0           | 0           |
| GO_CONDENSED_CHROMOSOME                                                 | 184 | 0.625094   | 2.0458548 | 0           | 0.01949567  |
| GO_NUCLEOTIDE_EXCISION_REPAIR_COMPLEX                                   | 14  | 0.7983497  | 2.0102675 | 0           | 0.038233623 |
| GO_CONDENSED_CHROMOSOME_CENTROMERIC_REGION                              | 94  | 0.6848244  | 1.9877609 | 0           | 0.038488626 |
| GO_KINETOCHORE                                                          | 112 | 0.657697   | 1.9568988 | 0           | 0.04419017  |
| GO_CONDENSED_NUCLEAR_CHROMOSOME                                         | 80  | 0.584971   | 1.9561487 | 0           | 0.036825143 |
| GO_MITOTIC_SPINDLE                                                      | 51  | 0.6454512  | 1.9554551 | 0           | 0.03201563  |
| GO_REPLICATION_FORK                                                     | 62  | 0.6866982  | 1.9434314 | 0.001972387 | 0.03494824  |
| GO_CHROMOSOMAL_REGION                                                   | 319 | 0.59015507 | 1.9427758 | 0           | 0.031548277 |
| GO_CONDENSED_NUCLEAR_CHROMOSOME_CENTROMERIC_REGION                      | 16  | 0.8323831  | 1.9366175 | 0           | 0.030137176 |

|                                                                  |     |            |           |             |             |
|------------------------------------------------------------------|-----|------------|-----------|-------------|-------------|
| GO_PROTEASOME_COMPLEX                                            | 76  | 0.66312754 | 1.9265217 | 0.007858546 | 0.030978143 |
| GO_CHROMOCENTER                                                  | 13  | 0.7435613  | 1.9160497 | 0.002123142 | 0.032441642 |
| GO_ORGANELLE_ENVELOPE_LUMEN                                      | 76  | 0.5594049  | 1.9022834 | 0.004040404 | 0.036134213 |
| GO_CHROMOSOME_CENTROMERIC_REGION                                 | 166 | 0.6220622  | 1.9008061 | 0           | 0.034466125 |
| GO_SPINDLE_MICROTUBULE                                           | 57  | 0.6339331  | 1.9004064 | 0           | 0.032366376 |
| GO_REPLISOME                                                     | 29  | 0.69838977 | 1.892537  | 0.001941748 | 0.033068    |
| GO_METHYLOSOME                                                   | 12  | 0.89705026 | 1.8873161 | 0           | 0.033075836 |
| GO_MIDBODY                                                       | 129 | 0.5590375  | 1.8792971 | 0           | 0.03451685  |
| GO_SPINDLE                                                       | 275 | 0.54570806 | 1.8760564 | 0           | 0.03406348  |
| GO_CHROMOSOME                                                    | 849 | 0.51045597 | 1.85601   | 0           | 0.041126177 |
| GO_NUCLEAR_CHROMOSOME                                            | 506 | 0.49960688 | 1.8502165 | 0.00203666  | 0.0412078   |
| GO_CHROMOSOME_TELOMERIC_REGION                                   | 158 | 0.54874    | 1.8380488 | 0.002057613 | 0.046140872 |
| GO_XY_BODY                                                       | 15  | 0.71142715 | 1.8375856 | 0.002004008 | 0.04421172  |
| GO_NUCLEAR_REPLICATION_FORK                                      | 39  | 0.66956687 | 1.8347232 | 0.002016129 | 0.043765962 |
| GO_NUCLEAR_CHROMOSOME_TELOMERIC_REGION                           | 128 | 0.5549181  | 1.8295096 | 0.004115226 | 0.04469737  |
| GO_PROTEIN_DNA_COMPLEX                                           | 171 | 0.5284183  | 1.8286493 | 0.006237006 | 0.043512262 |
| GO_SMN_SM_PROTEIN_COMPLEX                                        | 17  | 0.75621843 | 1.8266293 | 0.004115226 | 0.04252426  |
| GO_PROTEASOME_ACCESSORY_COMPLEX                                  | 24  | 0.7513342  | 1.8184818 | 0.00204499  | 0.045735843 |
| GO_SPINDLE_POLE                                                  | 116 | 0.5731225  | 1.8079107 | 0.002       | 0.051044542 |
| GO_U1_SNRNP                                                      | 17  | 0.7229952  | 1.7972847 | 0.008130081 | 0.055034705 |
| GO_CONDENSED_CHROMOSOME_OUTER_KINETOCHORE                        | 11  | 0.9060836  | 1.7920536 | 0.004016064 | 0.056582082 |
| GO_COPI_COATED_VESICLE_MEMBRANE                                  | 16  | 0.7472838  | 1.783408  | 0.003944773 | 0.059525277 |
| GO_ENDOPLASMIC_RETICULUM_GOLGI_INTERMEDIATE_COMPARTMENT_MEMBRANE | 58  | 0.5610592  | 1.7821074 | 0.010351967 | 0.058385517 |
| GO_DNA_PACKAGING_COMPLEX                                         | 104 | 0.5660737  | 1.7751032 | 0.02244898  | 0.060003523 |
| GO_PRECATALYTIC_SPLICEOSOME                                      | 21  | 0.7182518  | 1.7679787 | 0.009881423 | 0.062912434 |
| GO_ORGANELLAR_RIBOSOME                                           | 69  | 0.6611375  | 1.7659861 | 0.024340771 | 0.062298488 |
| GO_NUCLEAR_PORE                                                  | 74  | 0.59543335 | 1.7587587 | 0.00984252  | 0.06515336  |
| GO_PRONUCLEUS                                                    | 15  | 0.7300796  | 1.7550066 | 0.00203252  | 0.065573655 |
| GO_ORGANELLAR_LARGE_RIBOSOMAL_SUBUNIT                            | 31  | 0.6932568  | 1.7451748 | 0.028       | 0.07033719  |
| GO_ORGANELLAR_SMALL_RIBOSOMAL_SUBUNIT                            | 25  | 0.69598883 | 1.7440757 | 0.03        | 0.06922811  |
| GO_PRERIBOSOME                                                   | 59  | 0.6383732  | 1.7440171 | 0.018518519 | 0.067539625 |
| GO_INTRINSIC_COMPONENT_OF_MITOCHONDRIAL_INNER_MEMBRANE           | 17  | 0.6711382  | 1.7391809 | 0.009784736 | 0.06890651  |
| GO_TELOMERASE_HOLOENZYME_COMPLEX                                 | 19  | 0.6935331  | 1.7383791 | 0.014198783 | 0.06787225  |
| GO_SPLICEOSOMAL_TRI_SNRNP_COMPLEX                                | 26  | 0.6877061  | 1.7232084 | 0.033009708 | 0.076120496 |
| GO_COPI_VESICLE_COAT                                             | 12  | 0.745048   | 1.7228241 | 0.006012024 | 0.07458845  |
| GO_RIBONUCLEOPROTEIN_COMPLEX                                     | 693 | 0.5154228  | 1.7174256 | 0.020120725 | 0.076408155 |
| GO_ENDOPLASMIC_RETICULUM_GOLGI_INTERMEDIATE_COMPARTMENT          | 97  | 0.501618   | 1.7138463 | 0.008048289 | 0.076830775 |
| GO_DNA_REPAIR_COMPLEX                                            | 38  | 0.5748586  | 1.7115395 | 0.008032128 | 0.07716386  |
| GO_FILAMENTOUS_ACTIN                                             | 20  | 0.599922   | 1.6987783 | 0.016771488 | 0.08463159  |
| GO_NUCLEOID                                                      | 40  | 0.59771866 | 1.6982188 | 0.021956088 | 0.08314815  |
| GO_ESCRT_COMPLEX                                                 | 24  | 0.6488868  | 1.6947006 | 0.012170386 | 0.08428198  |
| GO_ESCRT_III_COMPLEX                                             | 11  | 0.74569863 | 1.686286  | 0.010080645 | 0.08892367  |
| GO_KINESIN_COMPLEX                                               | 54  | 0.5088976  | 1.6823125 | 0.014112903 | 0.090632655 |
| GO_SMALL_NUCLEAR_RIBONUCLEOPROTEIN_COMPLEX                       | 59  | 0.578973   | 1.6813229 | 0.027613413 | 0.089919195 |

|                                                       |      |            |           |             |             |
|-------------------------------------------------------|------|------------|-----------|-------------|-------------|
| GO_NUCLEOLAR_PART                                     | 61   | 0.590519   | 1.6805143 | 0.020833334 | 0.08898666  |
| GO_SITE_OF_DOUBLE_STRAND_BREAK                        | 31   | 0.5890624  | 1.6788667 | 0.023483366 | 0.08832552  |
| GO_DESMOSOME                                          | 26   | 0.5904874  | 1.6775085 | 0.01754386  | 0.08793189  |
| GO_CYTOPLASMIC_EXOSOME_RNASE_COMPLEX_                 | 15   | 0.68985546 | 1.6749554 | 0.00811359  | 0.08796088  |
| GO_CUL4_RING_E3_UBIQUITIN_LIGASE_COMPLEX              | 25   | 0.6250275  | 1.674746  | 0.00984252  | 0.08664821  |
| GO_RIBOSOME                                           | 217  | 0.60081834 | 1.6742573 | 0.074152544 | 0.08562632  |
| GO_NUCLEOLUS                                          | 820  | 0.469929   | 1.6734222 | 0.02008032  | 0.08486685  |
| GO_U12_TYPE_SPLICEOSOMAL_COMPLEX                      | 25   | 0.641022   | 1.664671  | 0.027944112 | 0.089238115 |
| GO_METHYLTRANSFERASE_COMPLEX                          | 83   | 0.55210423 | 1.6615765 | 0.010060363 | 0.090183884 |
| GO_DNA_DIRECTED_RNA_POLYMERASE_I_COMPLEX              | 13   | 0.678317   | 1.6611584 | 0.018595042 | 0.08910698  |
| GO_90S_PRERIBOSOME                                    | 23   | 0.65391266 | 1.649779  | 0.018789144 | 0.096765004 |
| GO_HOLO_TFIIF_COMPLEX                                 | 12   | 0.7022134  | 1.6420639 | 0.028225806 | 0.10165976  |
| GO_MITOCHONDRIAL_PROTEIN_COMPLEX                      | 130  | 0.5698359  | 1.6396762 | 0.070393376 | 0.10252093  |
| GO_CATALYTIC_STEP_2_SPLICEOSOME                       | 86   | 0.57532    | 1.6386323 | 0.031189084 | 0.10166273  |
| GO_ORGANELLE_INNER_MEMBRANE                           | 498  | 0.45414358 | 1.635548  | 0.03773585  | 0.102840886 |
| GO_NUCLEAR_NUCLEOSOME                                 | 40   | 0.5954632  | 1.6316879 | 0.048117153 | 0.10475935  |
| GO_DNA_DIRECTED_RNA_POLYMERASE_II_HOLOENZYME          | 95   | 0.5098183  | 1.6307847 | 0.012       | 0.10408149  |
| GO_SEX_CHROMOSOME                                     | 27   | 0.59284085 | 1.6248122 | 0.015936255 | 0.107553735 |
| GO_NUCLEAR_PERIPHERY                                  | 118  | 0.4930427  | 1.61825   | 0.018367346 | 0.11191613  |
| GO_DNA_DIRECTED_RNA_POLYMERASE_III_COMPLEX            | 18   | 0.6140867  | 1.6176693 | 0.023952097 | 0.11102001  |
| GO_RIBOSOMAL_SUBUNIT                                  | 158  | 0.6377086  | 1.6158568 | 0.0968421   | 0.11104481  |
| GO_FANCONI_ANAEMIA_NUCLEAR_COMPLEX                    | 13   | 0.67521495 | 1.6158319 | 0.016359918 | 0.1095837   |
| GO_NUCLEAR_EXOSOME_RNASE_COMPLEX_                     | 15   | 0.6742558  | 1.6134888 | 0.02258727  | 0.11010733  |
| GO_EXOSOME_RNASE_COMPLEX_                             | 21   | 0.6221308  | 1.6128706 | 0.022177419 | 0.10920379  |
| GO_CHROMATIN                                          | 430  | 0.4313483  | 1.6126702 | 0.01048218  | 0.10792079  |
| GO_CARBOXY_TERMINAL_DOMAIN_PROTEIN_KINASE_COMPLEX     | 22   | 0.6263262  | 1.6096051 | 0.014492754 | 0.10906407  |
| GO_NUCLEAR_CHROMATIN                                  | 285  | 0.42781344 | 1.6067563 | 0.008281574 | 0.110226825 |
| GO_RNA_POLYMERASE_COMPLEX                             | 120  | 0.49278396 | 1.6023597 | 0.027722772 | 0.11247446  |
| GO_PERICENTRIC_HETEROCHROMATIN                        | 14   | 0.67543846 | 1.602022  | 0.023904383 | 0.111368574 |
| GO_EUKARYOTIC_TRANSLATION_INITIATION_FACTOR_3_COMPLEX | 16   | 0.6755767  | 1.6000555 | 0.031936128 | 0.11198203  |
| GO_U2_SNRNP                                           | 18   | 0.6504549  | 1.6000228 | 0.040650405 | 0.11066459  |
| GO_ANAPHASE_PROMOTING_COMPLEX                         | 20   | 0.6247281  | 1.5992827 | 0.015936255 | 0.110066384 |
| GO_SMALL_SUBUNIT_PROCESSOME                           | 33   | 0.60705775 | 1.597637  | 0.04192872  | 0.11036505  |
| GO_NUCLEAR_UBIQUITIN_LIGASE_COMPLEX                   | 40   | 0.52782065 | 1.5963944 | 0.02918288  | 0.11022969  |
| GO_MITOCHONDRIAL_MATRIX                               | 397  | 0.44345337 | 1.5951979 | 0.045360826 | 0.11008649  |
| GO_NUCLEAR_HETEROCHROMATIN                            | 32   | 0.5408817  | 1.5940279 | 0.024390243 | 0.109908015 |
| GO_MITOCHONDRIAL_PART                                 | 900  | 0.41722912 | 1.5907418 | 0.052738335 | 0.11160001  |
| GO_EXTRINSIC_COMPONENT_OF_ORGANELLE_MEMBRANE          | 25   | 0.5463017  | 1.590667  | 0.017274473 | 0.11041337  |
| GO_ARP2_3_PROTEIN_COMPLEX                             | 11   | 0.6767838  | 1.5901756 | 0.037401576 | 0.109803736 |
| GO_DNA_DIRECTED_RNA_POLYMERASE_II_CORE_COMPLEX        | 16   | 0.5928018  | 1.5896355 | 0.025742574 | 0.108954884 |
| GO_SMALL_RIBOSOMAL_SUBUNIT                            | 67   | 0.63669467 | 1.588632  | 0.10782241  | 0.10863769  |
| GO_ENVELOPE                                           | 1034 | 0.39451194 | 1.5882437 | 0.01778656  | 0.10787465  |
| GO_U4_U6_X_U5_TRI_SNRNP_COMPLEX                       | 21   | 0.6486582  | 1.5877584 | 0.061023623 | 0.10709463  |
| GO_MITOCHONDRIAL_ENVELOPE                             | 651  | 0.4246095  | 1.5872039 | 0.049586777 | 0.10661438  |

|                                                       |      |            |           |             |             |
|-------------------------------------------------------|------|------------|-----------|-------------|-------------|
| GO_TRANSCRIPTION_FACTOR_TFTC_COMPLEX                  | 14   | 0.6385319  | 1.5843153 | 0.020449897 | 0.10783634  |
| GO_INTRINSIC_COMPONENT_OF_MITOCHONDRIAL_MEMBRANE      | 44   | 0.5077217  | 1.5821255 | 0.059760958 | 0.108412735 |
| GO_COHESIN_COMPLEX                                    | 11   | 0.6819116  | 1.5775199 | 0.04112554  | 0.11088169  |
| GO_DNA_POLYMERASE_COMPLEX                             | 13   | 0.6344448  | 1.5756717 | 0.03846154  | 0.111123737 |
| GO_MLL1_2_COMPLEX                                     | 26   | 0.5921828  | 1.5754778 | 0.018255578 | 0.11033714  |
| GO_CELL_SUBSTRATE_JUNCTION                            | 393  | 0.43214065 | 1.574573  | 0.04592902  | 0.110123545 |
| GO_LATERAL_ELEMENT                                    | 10   | 0.64834774 | 1.572871  | 0.05605381  | 0.11041852  |
| GO_PROTEASOME_REGULATORY_PARTICLE_BASE_SUBCOMPLEX     | 12   | 0.7154797  | 1.5725623 | 0.026156941 | 0.10965078  |
| GO_COPI_COATED_VESICLE                                | 22   | 0.5840315  | 1.5723255 | 0.046692606 | 0.10884525  |
| GO_CYTOSOLIC_PROTEASOME_COMPLEX                       | 11   | 0.7212852  | 1.5721248 | 0.026209677 | 0.10805043  |
| GO_SPLICEOSOMAL_COMPLEX                               | 165  | 0.51497704 | 1.5676765 | 0.05882353  | 0.11020962  |
| GO_HETEROCHROMATIN                                    | 66   | 0.48235494 | 1.5633675 | 0.018556701 | 0.11293165  |
| GO_PRERIBOSOME_LARGE_SUBUNIT_PRECURSOR                | 20   | 0.67208725 | 1.5618517 | 0.04621849  | 0.11303397  |
| GO_CELL_DIVISION_SITE                                 | 52   | 0.478522   | 1.5618477 | 0.026584867 | 0.112032674 |
| GO_LARGE_RIBOSOMAL_SUBUNIT                            | 91   | 0.6388327  | 1.5562295 | 0.10683761  | 0.11507954  |
| GO_EUCHROMATIN                                        | 30   | 0.5025108  | 1.5548385 | 0.030864198 | 0.11530045  |
| GO_PIGMENT_GRANULE                                    | 101  | 0.45336327 | 1.5444121 | 0.055785123 | 0.12283112  |
| GO_SMN_COMPLEX                                        | 12   | 0.6385872  | 1.541536  | 0.053497944 | 0.124197826 |
| GO_INNER_MITOCHONDRIAL_MEMBRANE_PROTEIN_COMPLEX       | 101  | 0.5738572  | 1.5405756 | 0.10973085  | 0.123900265 |
| GO_NUCLEAR_MATRIX                                     | 95   | 0.47337177 | 1.5404632 | 0.024793388 | 0.12290171  |
| GO_ANCHORING_JUNCTION                                 | 483  | 0.39881375 | 1.535496  | 0.04761905  | 0.12622277  |
| GO_MITOCHONDRIAL_MEMBRANE_PART                        | 161  | 0.49835575 | 1.5349631 | 0.10580913  | 0.12542067  |
| GO_DNA_HELICASE_COMPLEX                               | 14   | 0.64322674 | 1.5339364 | 0.036217302 | 0.12520336  |
| GO_CYTOCHROME_COMPLEX                                 | 20   | 0.5842063  | 1.5322926 | 0.088607594 | 0.12542772  |
| GO_MICROTUBULE_END                                    | 21   | 0.5945179  | 1.5303905 | 0.0513347   | 0.12607974  |
| GO_ORGANELLE_MEMBRANE_CONTACT_SITE                    | 11   | 0.6966256  | 1.5293269 | 0.027079303 | 0.1259721   |
| GO_INVADOPODIUM                                       | 12   | 0.59802914 | 1.5277249 | 0.060344826 | 0.12614769  |
| GO_CAJAL_BODY                                         | 49   | 0.51509035 | 1.5222515 | 0.062626265 | 0.1298703   |
| GO_RESPIRATORY_CHAIN                                  | 78   | 0.5824595  | 1.5213636 | 0.11958763  | 0.12955233  |
| GO_TRANSLATION_PREINITIATION_COMPLEX                  | 16   | 0.64571077 | 1.5183176 | 0.0734127   | 0.13123667  |
| GO_NUCLEAR_EUCHROMATIN                                | 23   | 0.5188934  | 1.5174655 | 0.033195022 | 0.13102703  |
| GO_BETA_CATENIN_DESTRUCTION_COMPLEX                   | 14   | 0.5651986  | 1.5098767 | 0.033126295 | 0.13640216  |
| GO_MITOCHONDRION                                      | 1546 | 0.37719896 | 1.5048269 | 0.059063137 | 0.14022863  |
| GO_INTERCELLULAR_BRIDGE                               | 40   | 0.48296908 | 1.503907  | 0.043824703 | 0.14003058  |
| GO_GERM_CELL_NUCLEUS                                  | 18   | 0.50249916 | 1.5007719 | 0.055201698 | 0.1417771   |
| GO_PROTEIN_PHOSPHATASE_TYPE_2A_COMPLEX                | 20   | 0.55312675 | 1.5004094 | 0.044806518 | 0.14105962  |
| GO_VESICLE_COAT                                       | 44   | 0.49916184 | 1.5000247 | 0.06420233  | 0.14043976  |
| GO_CYCLIN_DEPENDENT_PROTEIN_KINASE_HOLOENZYME_COMPLEX | 30   | 0.52727294 | 1.4953043 | 0.050314464 | 0.14352527  |
| GO_INO80_TYPE_COMPLEX                                 | 21   | 0.5713214  | 1.4863981 | 0.058704454 | 0.15045401  |
| GO_PRP19_COMPLEX                                      | 13   | 0.6547913  | 1.4801719 | 0.06990291  | 0.15514763  |
| GO_PRESPLICEOSOME                                     | 21   | 0.54631174 | 1.4782227 | 0.08863199  | 0.15592083  |
| GO_CLATHRIN_COAT_OF_ENDOCYTTIC_VESICLE                | 12   | 0.58347094 | 1.4724025 | 0.06097561  | 0.16057241  |
| GO_OXIDOREDUCTASE_COMPLEX                             | 92   | 0.46642926 | 1.4689081 | 0.126294    | 0.16312899  |
| GO_SMALL_NUCLEOLAR_RIBONUCLEOPROTEIN_COMPLEX          | 19   | 0.5963133  | 1.4648672 | 0.09876543  | 0.16626109  |

|                                                                 |      |            |           |             |            |
|-----------------------------------------------------------------|------|------------|-----------|-------------|------------|
| GO_DNA_REPLICATION_FACTOR_A_COMPLEX                             | 15   | 0.5857178  | 1.4594969 | 0.06187625  | 0.17042628 |
| GO_CORNIFIED_ENVELOPE                                           | 45   | 0.5670365  | 1.4584446 | 0.09567198  | 0.17036583 |
| GO_GOLGI_ASSOCIATED_VESICLE_MEMBRANE                            | 48   | 0.43847212 | 1.455886  | 0.057312254 | 0.17188369 |
| GO_COMPACT_MYELIN                                               | 14   | 0.5562161  | 1.4535052 | 0.07505071  | 0.17300765 |
| GO_MICROTUBULE_ORGANIZING_CENTER_PART                           | 138  | 0.41464427 | 1.4502409 | 0.068136275 | 0.17500137 |
| GO_CENTROSOME                                                   | 467  | 0.39898914 | 1.4440563 | 0.074       | 0.17991252 |
| GO_SYNAPTONEMAL_COMPLEX                                         | 33   | 0.44054693 | 1.4431202 | 0.058139537 | 0.17960514 |
| GO_MICROTUBULE_ORGANIZING_CENTER                                | 589  | 0.3896266  | 1.4401463 | 0.06288032  | 0.1814978  |
| GO_TOR_COMPLEX                                                  | 13   | 0.5768153  | 1.4379207 | 0.072265625 | 0.18276168 |
| GO_MICROTUBULE_CYTOSKELETON                                     | 1012 | 0.37152585 | 1.4359473 | 0.05858586  | 0.1836914  |
| GO_ENDOPLASMIC_RETICULUM_QUALITY_CONTROL_COMPARTMENT            | 13   | 0.603353   | 1.4357442 | 0.10958904  | 0.18267743 |
| GO_ENDOPLASMIC_RETICULUM_CHAPERONE_COMPLEX                      | 11   | 0.6550231  | 1.4351535 | 0.09856263  | 0.18209048 |
| GO_MRNA_CLEAVAGE_AND_POLYADENYLATION_SPECIFICITY_FACTOR_COMPLEX | 12   | 0.60519123 | 1.4257753 | 0.108606555 | 0.19079481 |
| GO_MICROTUBULE_PLUS_END                                         | 16   | 0.5741014  | 1.424729  | 0.09343936  | 0.190661   |
| GO_MYELIN_SHEATH                                                | 165  | 0.39438027 | 1.4230833 | 0.1         | 0.19094916 |
| GO_NUCLEAR_CYCLIN_DEPENDENT_PROTEIN_KINASE_HOLOENZYME_COMPLEX   | 15   | 0.5912651  | 1.4204445 | 0.10204082  | 0.19279106 |
| GO_PHOSPHATASE_COMPLEX                                          | 44   | 0.48636755 | 1.4184752 | 0.134       | 0.19343357 |
| GO_CYTOSOLIC_PART                                               | 213  | 0.44941416 | 1.4160222 | 0.1695279   | 0.19505422 |
| GO_CLATHRIN_COAT_OF_COATED_PIT                                  | 16   | 0.5293268  | 1.4157741 | 0.112       | 0.19418441 |
| GO_CYTOPLASMIC_STRESS_GRANULE                                   | 31   | 0.50593203 | 1.4157735 | 0.12273642  | 0.19298574 |
| GO_SCHMIDT_LANTERMAN_INCISURE                                   | 10   | 0.5664076  | 1.4141964 | 0.08782435  | 0.19345312 |
| GO_NADH_DEHYDROGENASE_COMPLEX                                   | 42   | 0.587203   | 1.4137212 | 0.18609408  | 0.19280127 |
| GO_INTRINSIC_COMPONENT_OF_ENDOPLASMIC_RETICULUM_MEMBRANE        | 120  | 0.39054215 | 1.4105048 | 0.08382066  | 0.19528994 |
| GO_MCM_COMPLEX                                                  | 11   | 0.6448941  | 1.4092671 | 0.1252485   | 0.19549616 |
| GO_N_TERMINAL_PROTEIN_ACETYLTANSFERASE_COMPLEX                  | 9    | 0.60607094 | 1.4059713 | 0.077731095 | 0.19751412 |
| GO_LATERAL_PLASMA_MEMBRANE                                      | 49   | 0.4071368  | 1.4014344 | 0.11214953  | 0.20105983 |
| GO_CYTOPLASMIC_UBIQUITIN_LIGASE_COMPLEX                         | 13   | 0.5510336  | 1.390843  | 0.08565737  | 0.21121041 |
| GO_CYTOSOLIC_RIBOSOME                                           | 109  | 0.58284867 | 1.387264  | 0.24472573  | 0.21404941 |
| GO_CYTOSOLIC_SMALL_RIBOSOMAL_SUBUNIT                            | 43   | 0.62217426 | 1.3870012 | 0.20940171  | 0.21305254 |
| GO_MRNA_CLEAVAGE_FACTOR_COMPLEX                                 | 17   | 0.560563   | 1.3845685 | 0.118609406 | 0.21439931 |
| GO_CYTOSOLIC_LARGE_RIBOSOMAL_SUBUNIT                            | 58   | 0.61769307 | 1.3824157 | 0.23868313  | 0.21563461 |
| GO_SIN3_TYPE_COMPLEX                                            | 16   | 0.54448086 | 1.3814529 | 0.115234375 | 0.21535446 |
| GO_RIBONUCLEOPROTEIN_GRANULE                                    | 142  | 0.39726046 | 1.3798908 | 0.12298387  | 0.2159885  |
| GO_CYTOSKELETAL_PART                                            | 1375 | 0.32888514 | 1.3790755 | 0.04831933  | 0.21564575 |
| GO_SEMAPHORIN_RECEPTOR_COMPLEX                                  | 11   | 0.5403336  | 1.376138  | 0.13821138  | 0.217876   |
| GO_U5_SNRNP                                                     | 16   | 0.5630189  | 1.3748124 | 0.15445544  | 0.21816726 |
| GO_IKAPPAB_KINASE_COMPLEX                                       | 11   | 0.5401259  | 1.3737681 | 0.12394958  | 0.2180395  |
| GO_RNA_POLYMERASE_II_TRANSCRIPTION_FACTOR_COMPLEX               | 101  | 0.38475907 | 1.3713241 | 0.116564415 | 0.21951196 |
| GO_TRANSFERASE_COMPLEX                                          | 671  | 0.38780746 | 1.3692687 | 0.14457831  | 0.22069615 |
| GO_STAGA_COMPLEX                                                | 14   | 0.54380524 | 1.3684026 | 0.107421875 | 0.22051162 |
| GO_HISTONE_METHYLTRANSFERASE_COMPLEX                            | 64   | 0.4613078  | 1.366467  | 0.16071428  | 0.2213981  |
| GO_CATALYTIC_COMPLEX                                            | 995  | 0.36449766 | 1.3624283 | 0.13572854  | 0.22445054 |
| GO_CENTRIOLE                                                    | 96   | 0.40761477 | 1.3590596 | 0.13114753  | 0.22682957 |
| GO_GAMMA_TUBULIN_COMPLEX                                        | 19   | 0.48909497 | 1.3567177 | 0.13095239  | 0.2280362  |

|                                                                                    |      |            |           |             |            |
|------------------------------------------------------------------------------------|------|------------|-----------|-------------|------------|
| GO_MALE_GERM_CELL_NUCLEUS                                                          | 14   | 0.47775525 | 1.3541172 | 0.12298387  | 0.23000774 |
| GO_MICROTUBULE_ASSOCIATED_COMPLEX                                                  | 143  | 0.37958485 | 1.3536754 | 0.11554622  | 0.22930379 |
| GO_PROTON_TRANSPORTING_TWO_SECTOR_ATPASE_COMPLEX_CATALYTIC_DOMAIN                  | 17   | 0.49567354 | 1.3482997 | 0.16227181  | 0.23439552 |
| GO_CYTOPLASMIC_MICROTUBULE                                                         | 52   | 0.402194   | 1.3462011 | 0.15913978  | 0.23570903 |
| GO_PROTEIN_PHOSPHATASE_TYPE_1_COMPLEX                                              | 10   | 0.60121113 | 1.34456   | 0.15662651  | 0.2362129  |
| GO_TRANSFERASE_COMPLEX_TRANSFERRING_PHOSPHORUS_CONTAINING_GROUPS                   | 233  | 0.38622758 | 1.3428963 | 0.15587045  | 0.23687142 |
| GO_ENDOPLASMIC_RETICULUM_SUBCOMPARTMENT                                            | 16   | 0.5017041  | 1.3425262 | 0.13778706  | 0.23611408 |
| GO_ENDORIBONUCLEASE_COMPLEX                                                        | 17   | 0.51173073 | 1.3410311 | 0.15800416  | 0.23668586 |
| GO_PROTEIN_KINASE_COMPLEX                                                          | 89   | 0.3974052  | 1.3408469 | 0.13292433  | 0.23562504 |
| GO_GEMINI_OF_COILED_BODIES                                                         | 10   | 0.5861722  | 1.3382926 | 0.1680498   | 0.23715729 |
| GO_EXON_EXON_JUNCTION_COMPLEX                                                      | 21   | 0.52045196 | 1.3318206 | 0.14910537  | 0.24316098 |
| GO_NUCLEAR_ENVELOPE                                                                | 400  | 0.34301764 | 1.3304824 | 0.14663951  | 0.24342686 |
| GO_CLATHRIN_VESICLE_COAT                                                           | 23   | 0.45778513 | 1.3296793 | 0.138833    | 0.24322869 |
| GO_OUTER_MITOCHONDRIAL_MEMBRANE_PROTEIN_COMPLEX                                    | 12   | 0.5612569  | 1.3252932 | 0.16221766  | 0.24678905 |
| GO_SUPRAMOLECULAR_FIBER                                                            | 646  | 0.3024545  | 1.3243201 | 0.081196584 | 0.24669227 |
| GO_CENTRIOLAR_SATELLITE                                                            | 24   | 0.45929345 | 1.3214265 | 0.12830958  | 0.24896678 |
| GO_TRANSCRIPTIONALLY_ACTIVE_CHROMATIN                                              | 19   | 0.4687087  | 1.3193872 | 0.15062761  | 0.24999443 |
| <b>Molecular function (57 terms)</b>                                               |      |            |           |             |            |
| GO_CYCLIN_DEPENDENT_PROTEIN_KINASE_ACTIVITY                                        | 34   | 0.59596914 | 1.772709  | 0.002004008 | 0.2264464  |
| GO_DISULFIDE_OXIDOREDUCTASE_ACTIVITY                                               | 31   | 0.5639808  | 1.7726935 | 0.004       | 0.20380178 |
| GO_UNFOLDED_PROTEIN_BINDING                                                        | 93   | 0.5652977  | 1.7709087 | 0.013861386 | 0.1883973  |
| GO_DNA_SECONDARY_STRUCTURE_BINDING                                                 | 24   | 0.6747988  | 1.7625717 | 0.005964215 | 0.18935034 |
| GO_DEOXYRIBONUCLEASE_ACTIVITY                                                      | 65   | 0.54601496 | 1.7546927 | 0.003838772 | 0.19224492 |
| GO_FOUR_WAY_JUNCTION_DNA_BINDING                                                   | 15   | 0.73733616 | 1.7443064 | 0.003992016 | 0.19441648 |
| GO_TELOMERASE_RNA_BINDING                                                          | 13   | 0.73477966 | 1.7424701 | 0.005780347 | 0.18500839 |
| GO_DNA_APURINIC_OR_APYRIMIDINIC_SITE_LYASE_ACTIVITY                                | 14   | 0.67090636 | 1.7395418 | 0.005736138 | 0.1779046  |
| GO_TRANSLATION_FACTOR_ACTIVITY_RNA_BINDING                                         | 85   | 0.5673898  | 1.7317507 | 0.01417004  | 0.18196087 |
| GO_SNORNA_BINDING                                                                  | 26   | 0.66639566 | 1.7308675 | 0.0227704   | 0.17317854 |
| GO_ENDODEOXYRIBONUCLEASE_ACTIVITY                                                  | 49   | 0.5563542  | 1.730388  | 0.003875969 | 0.16459635 |
| GO_RNA_POLYMERASE_ACTIVITY                                                         | 43   | 0.5890996  | 1.7267307 | 0.009633912 | 0.16133244 |
| GO_EXODEOXYRIBONUCLEASE_ACTIVITY                                                   | 15   | 0.6851024  | 1.724979  | 0.007633588 | 0.15597253 |
| GO_DNA_POLYMERASE_BINDING                                                          | 12   | 0.7362106  | 1.7079195 | 0.011952192 | 0.17373806 |
| GO_RNA_DNA_HYBRID_RIBONUCLEASE_ACTIVITY                                            | 7    | 0.85012937 | 1.702509  | 0.007797271 | 0.1755684  |
| GO_POLY_A_RNA_BINDING                                                              | 1136 | 0.5163767  | 1.7017269 | 0.006085193 | 0.16976267 |
| GO_EXONUCLEASE_ACTIVITY_ACTIVE_WITH_EITHER_RIBO_OR_DEOXYRIBONUCLEIC_ACIDS_AND_PROD | 42   | 0.6049815  | 1.7005074 | 0.003921569 | 0.16501117 |
| UCING_5_PHOSPHOMONOESTERS                                                          |      |            |           |             |            |
| GO_OXIDOREDUCTASE_ACTIVITY_OXIDIZING_METAL_IONS                                    | 18   | 0.59686893 | 1.6979871 | 0.015968064 | 0.16195983 |
| GO_RIBONUCLEOPROTEIN_COMPLEX_BINDING                                               | 94   | 0.5515675  | 1.6961001 | 0.01004016  | 0.15839937 |
| GO_DNA_HELICASE_ACTIVITY                                                           | 52   | 0.6337112  | 1.6949878 | 0.011904762 | 0.15478322 |
| GO_ATP_DEPENDENT_MICROTUBULE_MOTOR_ACTIVITY                                        | 18   | 0.620893   | 1.6936761 | 0.002079002 | 0.15116644 |
| GO_LIGASE_ACTIVITY_FORMING_CARBON_OXYGEN_BONDS                                     | 44   | 0.61798465 | 1.6883807 | 0.020283977 | 0.15364894 |
| GO_NUCLEOTIDYLTRANSFERASE_ACTIVITY                                                 | 123  | 0.5028087  | 1.67752   | 0.0078125   | 0.16441652 |
| GO_HISTONE_KINASE_ACTIVITY                                                         | 19   | 0.645991   | 1.6714854 | 0.02631579  | 0.16863915 |
| GO_RNA_BINDING                                                                     | 1538 | 0.4852454  | 1.6673499 | 0.014112903 | 0.17003563 |

|                                                                                                              |     |            |           |             |             |
|--------------------------------------------------------------------------------------------------------------|-----|------------|-----------|-------------|-------------|
| GO_AMINOACYL_TRNA_EDITING_ACTIVITY                                                                           | 9   | 0.7373682  | 1.6592922 | 0.01417004  | 0.17785034  |
| GO_PHOSPHATASE_ACTIVATOR_ACTIVITY                                                                            | 11  | 0.6918341  | 1.6559213 | 0.013182675 | 0.17761366  |
| GO_L_ASCORBIC_ACID_BINDING                                                                                   | 17  | 0.6026333  | 1.6534616 | 0.014403292 | 0.17594169  |
| GO_MACROLIDE_BINDING                                                                                         | 18  | 0.568697   | 1.6533175 | 0.033663366 | 0.17139137  |
| GO_INTRAMOLECULAR_TRANSFERASE_ACTIVITY                                                                       | 27  | 0.57158434 | 1.6518219 | 0.012219959 | 0.16927741  |
| GO_RNA_POLYMERASE_II_CARBOXY_TERMINAL_DOMAIN_KINASE_ACTIVITY                                                 | 16  | 0.6771608  | 1.6509368 | 0.005964215 | 0.16651683  |
| GO_STRUCTURE_SPECIFIC_DNA_BINDING                                                                            | 118 | 0.4839008  | 1.6368496 | 0.010245902 | 0.18350117  |
| GO_OXIDOREDUCTASE_ACTIVITY_ACTING_ON_A_SULFUR_GROUP_OF_DONORS                                                | 48  | 0.48290274 | 1.6363481 | 0.018255578 | 0.1798862   |
| GO_ATP_DEPENDENT_DNA_HELICASE_ACTIVITY                                                                       | 33  | 0.62332255 | 1.6339344 | 0.01192843  | 0.17932701  |
| GO_UBIQUITIN_LIKE_PROTEIN_CONJUGATING_ENZYME_ACTIVITY                                                        | 29  | 0.59377337 | 1.6145074 | 0.025145067 | 0.20471442  |
| GO_ENDODEOXYRIBONUCLEASE_ACTIVITY_PRODUCING_5_PHOSPHOMONOESTERS                                              | 11  | 0.63884395 | 1.6143475 | 0.021653544 | 0.20025939  |
| GO_METAL_CLUSTER_BINDING                                                                                     | 61  | 0.48897392 | 1.6123128 | 0.01968504  | 0.19880192  |
| GO_CIS_TRANS_ISOMERASE_ACTIVITY                                                                              | 45  | 0.49063978 | 1.6090858 | 0.024096385 | 0.20019035  |
| GO_ISOMERASE_ACTIVITY                                                                                        | 156 | 0.40923655 | 1.6086198 | 0.012345679 | 0.19650543  |
| GO_STRUCTURAL_CONSTITUENT_OF_NUCLEAR_PORE                                                                    | 13  | 0.7319034  | 1.5983399 | 0.010183299 | 0.20838094  |
| GO_NUCLEOSIDE_KINASE_ACTIVITY                                                                                | 13  | 0.62519777 | 1.5966307 | 0.019157087 | 0.20682418  |
| GO_NF_KAPPAB_BINDING                                                                                         | 30  | 0.5529674  | 1.5868734 | 0.031936128 | 0.21856599  |
| GO_RIBOSOMAL_SMALL_SUBUNIT_BINDING                                                                           | 12  | 0.6759848  | 1.5858672 | 0.024742268 | 0.2159485   |
| GO_EXONUCLEASE_ACTIVITY                                                                                      | 73  | 0.51389986 | 1.5818905 | 0.028846154 | 0.21884224  |
| GO_ENDONUCLEASE_ACTIVITY_ACTIVE_WITH_EITHER_RIBO_OR_DEOXYRIBONUCLEIC_ACIDS_AND_PRODUCING_5_PHOSPHOMONOESTERS | 34  | 0.5370378  | 1.5810101 | 0.035019454 | 0.2161074   |
| GO_3_5_EXONUCLEASE_ACTIVITY                                                                                  | 47  | 0.5491874  | 1.570972  | 0.031558186 | 0.23034796  |
| GO_STRUCTURAL_CONSTITUENT_OF_RIBOSOME                                                                        | 202 | 0.5533821  | 1.5599234 | 0.10515873  | 0.24592353  |
| GO_METHYL_CPG_BINDING                                                                                        | 20  | 0.573909   | 1.5590467 | 0.03041825  | 0.24335279  |
| GO_INTRAMOLECULAR_OXIDOREDUCTASE_ACTIVITY_INTERCONVERTING_ALDOSES_AND_KETOSES                                | 11  | 0.6543069  | 1.5538702 | 0.021912351 | 0.24854536  |
| <b>C6 Oncological signature (28 terms)</b>                                                                   |     |            |           |             |             |
| BIOCARTA_PTC1_PATHWAY                                                                                        | 11  | 0.8459149  | 1.945383  | 0.002118644 | 0.06398674  |
| BIOCARTA_P27_PATHWAY                                                                                         | 13  | 0.7969798  | 1.9289968 | 0           | 0.038441528 |
| BIOCARTA_G2_PATHWAY                                                                                          | 24  | 0.6917375  | 1.9036189 | 0.006160164 | 0.03788111  |
| BIOCARTA_CELLCYCLE_PATHWAY                                                                                   | 23  | 0.65959394 | 1.8606957 | 0.00408998  | 0.045502532 |
| BIOCARTA_PROTEASOME_PATHWAY                                                                                  | 28  | 0.77732474 | 1.8319854 | 0.007936508 | 0.04707304  |
| BIOCARTA_GLYCOLYSIS_PATHWAY                                                                                  | 10  | 0.79025996 | 1.7912003 | 0.010351967 | 0.06358903  |
| BIOCARTA_MCM_PATHWAY                                                                                         | 18  | 0.71597147 | 1.7694954 | 0.018556701 | 0.06876878  |
| BIOCARTA_HIF_PATHWAY                                                                                         | 15  | 0.6840519  | 1.7625527 | 0.004366812 | 0.065344326 |
| BIOCARTA_SRCRPT_PATHWAY                                                                                      | 11  | 0.71615475 | 1.7487165 | 0.010615711 | 0.06870219  |
| BIOCARTA_RB_PATHWAY                                                                                          | 13  | 0.6846301  | 1.7439233 | 0           | 0.06439214  |
| BIOCARTA_RANMS_PATHWAY                                                                                       | 10  | 0.82737935 | 1.7220055 | 0.016       | 0.073742755 |
| BIOCARTA_SKP2E2F_PATHWAY                                                                                     | 10  | 0.702789   | 1.7103677 | 0.005928854 | 0.075584196 |
| BIOCARTA_SALMONELLA_PATHWAY                                                                                  | 13  | 0.7176766  | 1.7035477 | 0.007968128 | 0.07478445  |
| BIOCARTA_EIF2_PATHWAY                                                                                        | 11  | 0.76882476 | 1.7004058 | 0.002024292 | 0.07195907  |
| BIOCARTA_RAB_PATHWAY                                                                                         | 12  | 0.70288587 | 1.6705955 | 0.021868788 | 0.08710322  |
| BIOCARTA_EIF_PATHWAY                                                                                         | 16  | 0.6816011  | 1.6425833 | 0.021868788 | 0.10431794  |
| BIOCARTA_ATRBRCA_PATHWAY                                                                                     | 21  | 0.63465095 | 1.6402888 | 0.017716536 | 0.10076495  |
| BIOCARTA_RACCYCD_PATHWAY                                                                                     | 26  | 0.5962543  | 1.6380337 | 0.02008032  | 0.096681274 |

|                                |    |            |           |             |            |
|--------------------------------|----|------------|-----------|-------------|------------|
| BIOCARTA_FREE_PATHWAY          | 9  | 0.6763291  | 1.5989605 | 0.023861172 | 0.12729096 |
| BIOCARTA_UCALPAIN_PATHWAY      | 18 | 0.60840744 | 1.580332  | 0.031578947 | 0.14142391 |
| BIOCARTA_CDC42RAC_PATHWAY      | 16 | 0.65308535 | 1.5594262 | 0.033864543 | 0.15784384 |
| BIOCARTA_G1_PATHWAY            | 28 | 0.5214182  | 1.5509028 | 0.046938777 | 0.1612215  |
| BIOCARTA_MTA3_PATHWAY          | 18 | 0.538474   | 1.5497025 | 0.039130434 | 0.15579833 |
| BIOCARTA_P35ALZHEIMERS_PATHWAY | 11 | 0.60613376 | 1.4991324 | 0.03976143  | 0.21654968 |
| BIOCARTA_DNAFRAGMENT_PATHWAY   | 10 | 0.628387   | 1.4850376 | 0.072434604 | 0.22850932 |
| BIOCARTA_ATM_PATHWAY           | 20 | 0.5571135  | 1.4751178 | 0.064449064 | 0.23431115 |
| BIOCARTA_ACTINY_PATHWAY        | 20 | 0.54589474 | 1.4745562 | 0.07185629  | 0.22656365 |
| BIOCARTA_PTDINS_PATHWAY        | 23 | 0.5363502  | 1.45985   | 0.071428575 | 0.23828006 |

**Terms enriched in low risk group**

**C2 KEGG (1 terms)**

|                                              |     |            |            |   |            |
|----------------------------------------------|-----|------------|------------|---|------------|
| KEGG_NEUROACTIVE_LIGAND_RECEPTOR_INTERACTION | 270 | -0.5301249 | -1.9103235 | 0 | 0.09315833 |
|----------------------------------------------|-----|------------|------------|---|------------|

**C5**

**Biological process (0 terms)**

**Cellular component (3 terms)**

|                               |    |             |            |             |            |
|-------------------------------|----|-------------|------------|-------------|------------|
| GO_MAIN_AXON                  | 57 | -0.6137751  | -1.9344873 | 0           | 0.13338119 |
| GO_APICAL_DENDRITE            | 13 | -0.68443125 | -1.8339114 | 0.001848429 | 0.20765187 |
| GO_NEURON_PROJECTION_MEMBRANE | 34 | -0.5705935  | -1.6494124 | 0.012433393 | 0.24696921 |

**Molecular function (30 terms)**

|                                                        |      |             |            |             |            |
|--------------------------------------------------------|------|-------------|------------|-------------|------------|
| GO_POTASSIUM_CHANNEL_ACTIVITY                          | 119  | -0.5401616  | -1.881483  | 0           | 0.18842526 |
| GO_SIGNALING_RECEPTOR_ACTIVITY                         | 1321 | -0.40520954 | -1.8378897 | 0           | 0.22552337 |
| GO_G_PROTEIN_COUPLED_RECEPTOR_ACTIVITY                 | 817  | -0.38562855 | -1.8358582 | 0           | 0.17340446 |
| GO_PEPTIDE_RECEPTOR_ACTIVITY                           | 127  | -0.54304916 | -1.8121959 | 0.003584229 | 0.18765643 |
| GO_DELAYED_RECTIFIER_POTASSIUM_CHANNEL_ACTIVITY        | 36   | -0.6197212  | -1.8067665 | 0.003478261 | 0.16693386 |
| GO_PHOSPHORIC_DIESTER_HYDROLASE_ACTIVITY               | 90   | -0.4992297  | -1.7794026 | 0           | 0.19396083 |
| GO_RECEPTOR_ACTIVITY                                   | 1563 | -0.39239866 | -1.777063  | 0.001838235 | 0.17344797 |
| GO_ADRENERGIC_RECEPTOR_BINDING                         | 19   | -0.6341564  | -1.7739949 | 0.006036217 | 0.15868044 |
| GO_CARBOXYPEPTIDASE_ACTIVITY                           | 38   | -0.53562874 | -1.7690663 | 0.001703578 | 0.15114729 |
| GO_VOLTAGE_GATED_CATION_CHANNEL_ACTIVITY               | 133  | -0.49740162 | -1.7464465 | 0.004926108 | 0.17381446 |
| GO_SERINE_TYPE_EXOPEPTIDASE_ACTIVITY                   | 18   | -0.6049076  | -1.7460067 | 0.003745318 | 0.16047662 |
| GO_GATED_CHANNEL_ACTIVITY                              | 319  | -0.454151   | -1.7320489 | 0.001652893 | 0.1702009  |
| GO_CATION_CHANNEL_ACTIVITY                             | 290  | -0.4486865  | -1.7271901 | 0.00331675  | 0.16735497 |
| GO_LIGAND_GATED_CHANNEL_ACTIVITY                       | 138  | -0.46703282 | -1.7210503 | 0.001636661 | 0.16623475 |
| GO_G_PROTEIN_COUPLED_CHEMOATTRACTANT_RECEPTOR_ACTIVITY | 22   | -0.7278793  | -1.7166375 | 0.020183487 | 0.16316581 |
| GO_CYCLIC_NUCLEOTIDE_PHOSPHODIESTERASE_ACTIVITY        | 25   | -0.6101103  | -1.7129616 | 0.005736138 | 0.15961972 |
| GO_PHOSPHOLIPASE_C_ACTIVITY                            | 31   | -0.5476513  | -1.7128425 | 0.007518797 | 0.15093626 |
| GO_EXTRACELLULAR_LIGAND_GATED_ION_CHANNEL_ACTIVITY     | 75   | -0.51395744 | -1.7126123 | 0.006568145 | 0.14321831 |
| GO_3_5_CYCLIC_GMP_PHOSPHODIESTERASE_ACTIVITY           | 14   | -0.67524856 | -1.7057961 | 0.015296367 | 0.145294   |
| GO_VOLTAGE_GATED_SODIUM_CHANNEL_ACTIVITY               | 20   | -0.65179735 | -1.6942664 | 0.014159292 | 0.15501155 |
| GO_VOLTAGE_GATED_ION_CHANNEL_ACTIVITY                  | 188  | -0.4572963  | -1.677874  | 0.006644518 | 0.17324595 |
| GO_CYTOKINE_RECEPTOR_ACTIVITY                          | 85   | -0.5309697  | -1.6516032 | 0.030797102 | 0.21209529 |
| GO_PEPTIDE_HORMONE_BINDING                             | 36   | -0.5490085  | -1.645897  | 0.009345794 | 0.2134605  |
| GO_CYCLASE_ACTIVITY                                    | 21   | -0.57964176 | -1.644735  | 0.018656716 | 0.20693746 |



|                                                |      |             |            |             |            |
|------------------------------------------------|------|-------------|------------|-------------|------------|
| GO_3_5_CYCLIC_AMP_PHOSPHODIESTERASE_ACTIVITY   | 15   | -0.6743193  | -1.6427832 | 0.0227704   | 0.20302416 |
| GO_INWARD_RECTIFIER_POTASSIUM_CHANNEL_ACTIVITY | 22   | -0.5571651  | -1.6124709 | 0.021558871 | 0.24808282 |
| GO_SIGNAL_TRANSDUCER_ACTIVITY                  | 1652 | -0.34759322 | -1.5912715 | 0.007590133 | 0.24472035 |
| GO_SERINE_TYPE_CARBOXYPEPTIDASE_ACTIVITY       | 14   | -0.5939026  | -1.5881804 | 0.03564728  | 0.24348828 |
| GO_IMMUNOGLOBULIN_RECEPTOR_BINDING             | 7    | -0.8023157  | -1.5816555 | 0.020522388 | 0.24862528 |
| GO_CAMP_BINDING                                | 22   | -0.553671   | -1.5807339 | 0.021778584 | 0.24358347 |
| <b>C6 Oncological signature ( terms)</b>       |      |             |            |             |            |
| BIOCARTA_GRANULOCYTES_PATHWAY                  | 13   | -0.8286528  | -1.8326796 | 0.001858736 | 0.14008604 |
| BIOCARTA_THELPER_PATHWAY                       | 12   | -0.8545251  | -1.545204  | 0.029126214 | 0.23535249 |
| BIOCARTA_TCYTOTOXIC_PATHWAY                    | 12   | -0.8540751  | -1.5399984 | 0.034951456 | 0.23010892 |

---

## Supplementary figure legends

**Figure S1** LASSO analysis of the 36 prognostic DE-MTGs in PDAC. (A) LASSO coefficient profiles of the 36 prognostic DE-MTGs in PDAC. (B) Lasso deviance profiles of the 36 prognostic DE-MTGs in PDAC.

**Figure S2** (A–C) ROC curves for 1-, 2-, and 3-year overall survival predictions for the MTG-based gene signature compared with those of the AJCC staging system and three previously defined gene signatures in the TCGA-PAAD datasets. (D–F) ROC curves for 1-, 2-, and 3-year overall survival predictions for the MTG-based gene signature compared with those of the AJCC staging system and three previously defined gene signatures in the external validation dataset GSE62452. (G–I) ROC curves for 1-, 2-, and 3-year overall survival predictions for the MTG-based gene signature compared with those of the three previously defined gene signatures in the external validation dataset ICGC.

**Figure S3** (A–C) ROC curves for 1-, 2-, and 3-year overall survival predictions of the nomogram compared with those of the AJCC staging system in TCGA-PAAD dataset. (D–F) ROC curves for 1-, 2-, and 3-year overall survival predictions of the nomogram compared with those of the gene signature proposed by Zhou C et al. in TCGA-PAAD dataset. (G–I) ROC curves for 1-, 2-, and 3-year overall survival predictions of the nomogram compared with those of the gene signature proposed by Chen H et al. in TCGA-PAAD dataset. (J–L) ROC curves for 1-, 2-, and 3-year overall survival predictions of the nomogram compared with those of the gene signature proposed by Liao X et al. in TCGA-PAAD dataset.

**Figure S1**

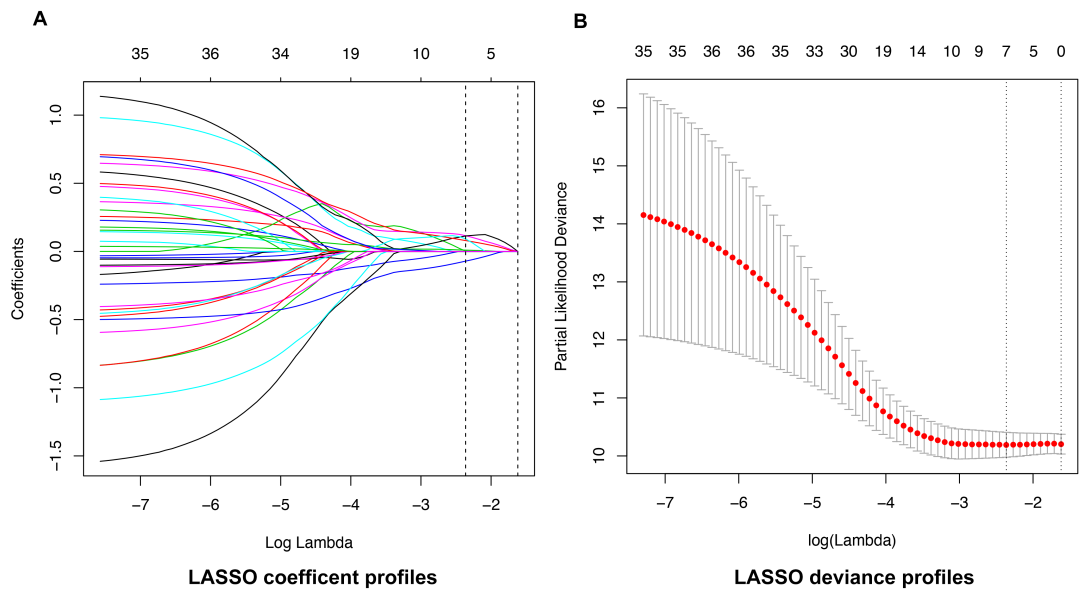

Figure S2

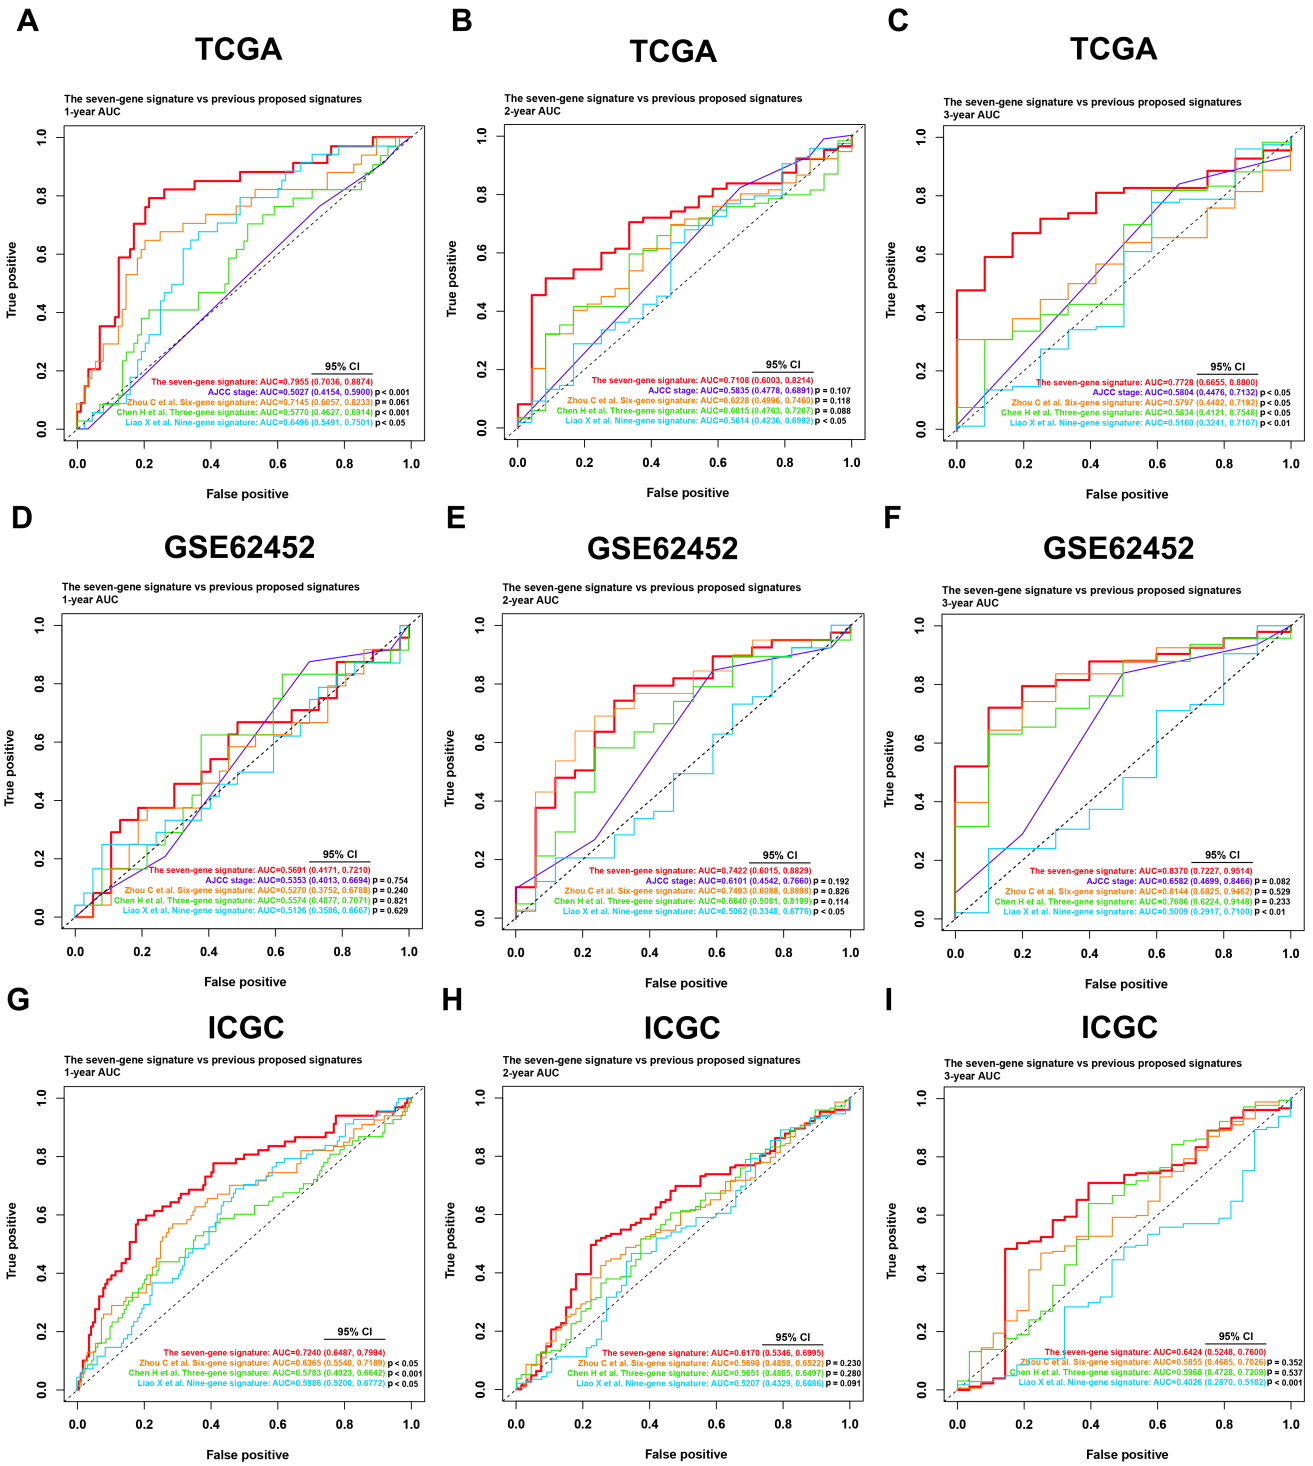

**Figure S3**

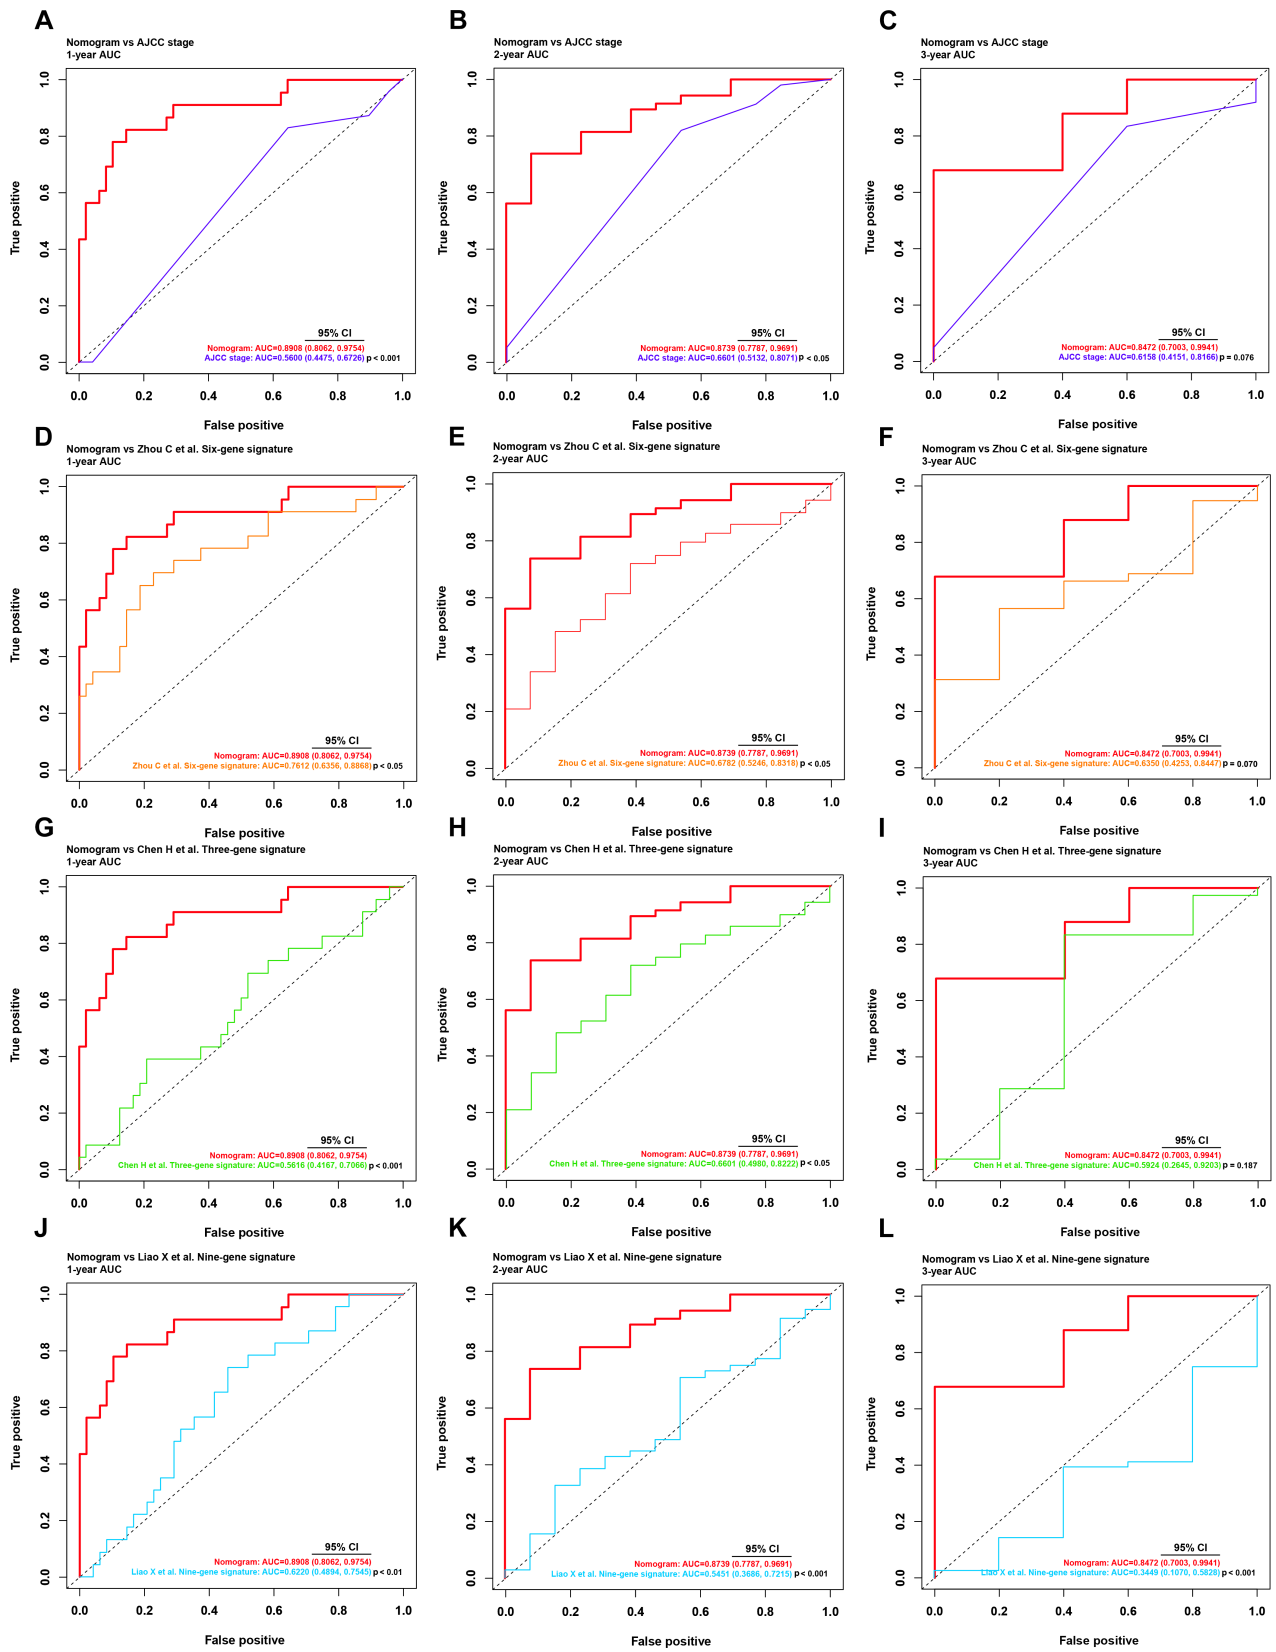

Supplement: jcav11p6299s1.pdf [file jcav11p6299s1.pdf]
